# Supplementary material for: The association of maternal age with infant mortality, child anthropometric failure, diarrhoea and anaemia for first births: evidence from 55 low- and middle-income countries
Source: PubMed Central journal article supplement — BMJ Open. 2011 Sep 30;1(2):e000226. doi: 10.1136/bmjopen-2011-000226 (PMC3191600; doi:10.1136/bmjopen-2011-000226), 2011-09-30
Supplement: bmjopen-2011-000226.draft_revisions.pdf [file bmjopen-2011-000226.draft_revisions.pdf]

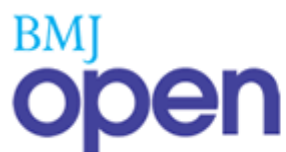

**Association of Maternal Age with Infant Mortality, Child Anthropometric Failure, Diarrhoea, and Anaemia for First Births in Low- and Middle-Income Countries**

|                                 |                                                                                                                                                                                                                                                 |
|---------------------------------|-------------------------------------------------------------------------------------------------------------------------------------------------------------------------------------------------------------------------------------------------|
| Journal:                        | <i>BMJ Open</i>                                                                                                                                                                                                                                 |
| Manuscript ID:                  | bmjopen-2011-000226                                                                                                                                                                                                                             |
| Article Type:                   | Research                                                                                                                                                                                                                                        |
| Date Submitted by the Author:   | 17-Jun-2011                                                                                                                                                                                                                                     |
| Complete List of Authors:       | Finlay, Jocelyn; Harvard School of Public Health, Global Health and Population<br>Ozaltin, Emre; Harvard School of Public Health, Global Health and Population<br>Canning, David; Harvard School of Public Health, Global Health and Population |
| <b>Primary Subject Heading</b>: | Public health                                                                                                                                                                                                                                   |
| Keywords:                       | PUBLIC HEALTH, PREVENTIVE MEDICINE, Community child health < PAEDIATRICS                                                                                                                                                                        |
|                                 |                                                                                                                                                                                                                                                 |

SCHOLARONE™  
Manuscripts

1  
2  
3 **Title**  
4  
5 Association of Maternal Age with Infant Mortality, Child Anthropometric Failure, Diarrhoea, and Anaemia for First Births  
6  
7 in Low- and Middle-Income Countries  
8

9  
10 **Author, Degrees and Affiliation**

11 Jocelyn E. Finlay, PhD, Department of Global Health and Population, Harvard School of Public Health, USA

12  
13 Emre Özaltın, MSc, Department of Global Health and Population, Harvard School of Public Health, USA

14  
15 David Canning, PhD, Department of Global Health and Population, Harvard School of Public Health, USA  
16  
17

18  
19 **Corresponding Author**

20  
21 Jocelyn E. Finlay, Research Associate, Harvard Centre for Population and Development Studies, 9 Bow St, Cambridge, MA

22  
23 02138, USA. Tel: 617-372-735; Email: [jfinlay@hsph.harvard.edu](mailto:jfinlay@hsph.harvard.edu)  
24

25  
26 **Running head:** Maternal Age and Child Health  
27  
28  
29  
30  
31  
32  
33  
34  
35  
36  
37  
38  
39  
40  
41  
42  
43  
44  
45  
46  
47  
48  
49  
50  
51  
52  
53  
54  
55  
56  
57  
58  
59  
60

1 **Objective:** To examine the association between maternal age at first birth and infant mortality, stunting, underweight,  
2 wasting, diarrhoea and anaemia of children in low- middle-income countries.  
3

4 **Design:** Cross-sectional analysis of nationally representative household samples. A modified Poisson regression model is  
5 used to estimate relative risk ratios. Unadjusted relative risk ratios by country and pooled across countries are presented  
6 as are ratios after adjusting for maternal, paternal, household and social covariates for the pooled sample.  
7  
8

9 **Setting:** Low- and middle-income countries  
10

11 **Population:** First births to women aged 12-35 and where this birth occurred 12-60 months prior to the interview.  
12

13 Information on infant mortality in the last five years and current child health was obtained from a personal interview  
14 and anthropometric measurement. The sample for analyzing infant mortality is comprised of 176,583 children in 55 low-  
15 and middle-income countries across 118 Demographic and Health Surveys conducted between 1990 and 2008.  
16  
17  
18  
19  
20  
21

22 **Main Outcome Measures:** In under 12 months: infant mortality. In under 5s: stunting, underweight, wasting, diarrhoea  
23 and anaemia.  
24  
25  
26

27 **Results:** The majority of women have their first birth before the age of 24 ( 83.1%; 146,578/176,583). In adjusted  
28 models, the relative risk of infant mortality is minimized if the first birth is between the ages of 18-32, and is higher  
29 when the first birth is between the ages of 12-17, and 33-35 (RRR 1.307, 95% CI 1.160 to 1.474 for 15-17 year old  
30 mothers compared to the reference group of women aged 27-29). Women who have their first birth aged 12-26 face a  
31 higher risk of having a child who is stunted than women who have their first birth age 27-35. For underweight, the risk is  
32 lowest for women aged 21-35 (RRR 1.218, 95% CI 1.131 to 1.313 for risk of underweight for 15-17 year old mothers). For  
33 child health outcomes of diarrhoea and anaemia the risk is lowest for women aged 27-35 at first birth. Adjusted RRR is  
34 1.357, 95% CI 1.222 to 1.507 for risk of a first born child with moderate or strong anaemia for 15-17 year old mothers  
35 compared to the reference group. For wasting, the risk is equal across the age of mother at first birth. Young maternal  
36 age worsens child health outcomes. The effects are largest for very young mothers, but child health outcomes continue  
37 to improve if first birth is delayed until age 27 (for example, RRR 1.239, 95% CI 1.114 to 1.378 for risk of a first born child  
38 with moderate or strong anaemia for mothers age 24-26).  
39  
40  
41  
42  
43  
44  
45  
46  
47  
48  
49  
50  
51  
52  
53  
54

55 **Conclusions:** Adolescent mothers are the most vulnerable to infant mortality and poor child health outcomes.  
56

57 Additionally, first time mothers up to the age of 27 have higher risk of having a child who suffers from stunting,  
58  
59  
60

1 diarrhoea and moderate or strong anaemia. Maternal and child health programs should take account of this increased  
2 risk even for mothers in their twenties. Increasing age as first birth in developing countries may have large benefits in  
3 terms of child health.  
4  
5  
6  
7  
8

## 9 **Article summary**

### 10 Article focus

11  
12 In this article we used data from 118 Demographic and Health Surveys covering 55 low- to middle- income countries to  
13 investigate the effect of age of mother at first birth on infant mortality and child health outcomes.  
14  
15  
16

17 Using this data, we explore the relative risk of infant mortality and child health by age of mother at birth; the role of  
18 biological and socio-economic factors that are captured in the effect of age of mother on child health; and whether high  
19 socio-economic status compensates for poor health outcomes of children to young mothers.  
20  
21  
22  
23  
24  
25

### 26 Key messages

27  
28 - In a global sample of women who had their first birth between the ages of 12 and 35, we found the risk of poor child  
29 health outcome is lowest for women who have their first birth between the ages of 27-29.  
30  
31  
32

33 - We attempt to separate out the biological and social mechanisms associated with young age at first birth. The  
34 biological mechanism is grounded in the fact that younger women are biologically immature. The social mechanism  
35 draws on the hypothesis that younger mothers are more likely to be socio-economically disadvantaged. We find that  
36 both biological and social mechanisms play an equal role in explaining why children of young mothers have poorer  
37 outcomes in terms of infant mortality, underweight, wasting and anaemia. For the other two outcomes we explore in  
38 the paper, stunting and diarrhoea, we find that the biological mechanism is stronger than the social mechanism.  
39  
40  
41  
42  
43  
44  
45  
46  
47

48 - We find that while the absolute risk of poor child health outcomes is lower for children of high SES mothers than that  
49 of children to low SES mothers, the relative risk of a poor child health outcomes to young mothers is higher for high SES  
50 mothers.  
51  
52  
53  
54  
55

### 56 Strengths and limitations of this study

57  
58  
59  
60

1 Strengths

- 2 - A large sample representing 176,583 first births across 55 low- to middle- income countries is used.
- 3
- 4 - A large number of covariates that enable the separation of biological and socio-economic influences on child health are
- 5 applied.
- 6
- 7
- 8
- 9 - A range of child health outcomes rather than just one indicator are explored.
- 10

11 Weaknesses

- 12
- 13
- 14 - Age reporting of mother and child can be inaccurate, especially in low- to middle-income countries.
- 15
- 16 - Measures for income included in the Demographic and Health Surveys may not represent full income of the household.
- 17
- 18
- 19
- 20
- 21
- 22
- 23
- 24
- 25
- 26
- 27
- 28
- 29
- 30
- 31
- 32
- 33
- 34
- 35
- 36
- 37
- 38
- 39
- 40
- 41
- 42
- 43
- 44
- 45
- 46
- 47
- 48
- 49
- 50
- 51
- 52
- 53
- 54
- 55
- 56
- 57
- 58
- 59
- 60

## Introduction

Progress towards reaching Millennium Development Goal 4 (child health) focuses on the measurable reduction in under-5 mortality. In low- to middle-income countries, this also means "revitalizing efforts against...diarrhoea, while bolstering nutrition...".<sup>1</sup> The risk of under-5 mortality, and the prevalence of diarrheal disease and nutritional deficiencies that manifest themselves in outcomes such as stunting, wasting, underweight and anaemia in young children, underscore the need to understand the basic determinants of these poor child health outcomes. In India alone, 6.0% (95% CI 5.7-6.3) children die before their fifth birthday. In the same population, for children under-5, 42.2% are underweight, 47.8% are stunted, 19.7% are wasted, and 69.1% are anaemic.<sup>2</sup> Cross-country studies highlight that these prevalence percentages are the norm throughout low- to middle-income countries.<sup>3</sup> A report on adolescent girls in low- to middle-income countries by the Centre for Global Development<sup>4</sup> highlighted the risk to child health associated with young motherhood. When considering child health, the report draws on the intergenerational influence on child health outcomes, rather than a cross sectional observation of children alone. The effect of the age of mother at birth on child health outcomes has been explored in a few country studies in low- to middle-income context.<sup>5-14</sup> In the case of India, Raj *et al*<sup>13</sup> show that children to mothers who were married as minors were at a higher risk of stunting and underweight compared to children of women who had married at majority age. In another study, using the World Fertility Survey Trussell and Hammerslough<sup>14</sup> also found that mothers' age at first birth was a significant risk factors of infant mortality in Sri Lanka. In low- to middle-income countries, 26.5% of women have their first birth before the age of 18, and 83.1% have it before age 24. Much debate, particularly with US population samples, concerns the social versus physiological influence of young motherhood on child health outcomes.<sup>15-21</sup> Young age can proxy for "short stature, low body weight in relation to height, and greater likelihood of inadequate weight gain during pregnancy along with difficulty of delivery"<sup>22</sup> These physiological factors point to vulnerability for poor child health outcomes. Women in low- to middle-income countries who have children at a young age are also more likely to be, and remain, poor and uneducated.<sup>4</sup> These social factors also disadvantage young mothers in terms of their child's health outcome. Analysis that generalizes across and within countries, rather than focusing on a sample from a single country, provides standardized analyses and results to assess age as a proxy for physiological immaturity and social disadvantage and the effect on child health outcomes.

1 Early work by Hobcraft<sup>12</sup> in 1992 examines the effect of age at first birth on child survival in a number of countries using  
2 Demographic and Health Surveys available at that time. Given the prevalence of poor child health outcomes in low- to  
3 middle-income countries, and not just high infant mortality, studies that extend the monitoring of child health beyond  
4 infant mortality provide valuable information regarding health disparities and progress in achieving MDG4, and its sub-  
5 goals relating to child health.  
6  
7  
8  
9  
10

11 The purpose of the current study to assess the association between maternal age at first birth and child health  
12 outcomes: infant mortality, stunting, underweight, wasting, diarrhoea, and moderate or strong anaemia. Taking account  
13 of confounding socio-economic factors, the physiological effect of young motherhood on child health can be parsed out  
14 from the social disadvantage that young mothers are also likely to face. The findings could critically inform family  
15 planning policies and programs aimed at delaying first birth beyond the teenage years.  
16  
17  
18  
19  
20  
21  
22

## 23 **Methods**

### 24 ***Data Source***

25 Information from 118 Demographic and Health Surveys (DHS) conducted in 55 countries between 1990 and 2008  
26 provided the data for the analysis in this study.<sup>23</sup> The DHS are nationally representative household sample surveys that  
27 measure population, health, socio-economic, and anthropometric indicators, emphasizing maternal and child health.<sup>24</sup>  
28 The DHS are important data source for studying population health across developing countries due to extensive  
29 coverage, comparability, and data quality.<sup>25-27</sup> To ensure standardization and comparability across diverse sites and  
30 time, DHS research employs intense interviewer training, standardized measurement tools and techniques, an identical  
31 core questionnaire, and instrument pretesting.<sup>28</sup> Country reports detail pretesting and quality assurance measures by  
32 survey (see [www.measuredhs.com/pubs/search/search\\_results.cfm?Type=5&srchTp=type&newSrch=1](http://www.measuredhs.com/pubs/search/search_results.cfm?Type=5&srchTp=type&newSrch=1)). The DHS is  
33 modular in structure, and in addition to the core questionnaire, a set of country-relevant sections, and country-specific  
34 variables. The DHS provides data with standardized variables across surveys (see  
35 [www.measuredhs.com/pubs/pdf/DHSG4/Recode4DHS.pdf](http://www.measuredhs.com/pubs/pdf/DHSG4/Recode4DHS.pdf)).  
36  
37  
38  
39  
40  
41  
42  
43  
44  
45  
46  
47  
48  
49  
50  
51  
52  
53  
54

### 55 ***Sampling Plan***

56  
57  
58  
59  
60

1 The DHS involves stratified cluster randomized samples of households.<sup>29</sup> Every survey population is stratified by  
2 urban and rural status and additionally by country-specific geographic or administrative regions. Within each stratified  
3 area random clusters of households are drawn from a list of all enumeration areas taken from a population census. In  
4 the second stage of sampling, all private households within the cluster were listed (institutions excluded) and an average  
5 of 25 houses within a cluster are selected by equal probability systematic sampling to be surveyed. Detailed sampling  
6 plans are available from survey final reports at

7 [www.measuredhs.com/pubs/search/search\\_results.cfm?Type=5&srchTp=type&newSrch=1](http://www.measuredhs.com/pubs/search/search_results.cfm?Type=5&srchTp=type&newSrch=1).

8 Within each sampled household a household questionnaire is administered and women eligible for a more detailed  
9 women's survey are identified. In most surveys all women between the ages of 15-49 are interviewed. In a limited  
10 number of surveys the target group it is women aged 10-49, or 15-45, or ever-married women. The child anthropometry  
11 module was conducted in a selection of the Standard Demographic and Health Surveys  
12 <http://www.measuredhs.com/aboutsurveys/biomarkers/surveys.cfm>. The DHS provides weights that can be used to  
13 make the sample nationally representative.

### 14 ***Study Population and Sample Size***

15 Our sample consists of children born to women who have had their first birth in the period 12-60 months before  
16 the survey. The lower bound of 12 months is applied so that each child has equal exposure to one year of life and we  
17 can accurately calculate the infant mortality (children who die within the first year of life). Detailed child health  
18 measures are only taken for children up to 60 months which establishes our upper bound. Note the upper bound is to 60  
19 months rather than 59 to conform to the World Health Organization norm. Only the first birth is in the sample for each  
20 woman, for multiply births we only use data from the first recorded birth, though we control for this being a part of a  
21 multiple birth. The initial sample is 288,752 children across 72 countries from 181 surveys. Infant mortality status is not  
22 available for 5,313 of these children reducing the sample to 283,439. Not all mothers' age at the first birth is recorded  
23 (1,564 missing) reducing the sample to 280,146 children. The age of mother is restricted to 12-35 as only 13 of the  
24 mothers had their children at age less than 12 and 1716 had their first birth at 36 or older. This leaves the sample at  
25 280,146. We lose a significant number of observations due to missing covariates since not all surveys collect data on all



1 our covariate (103,563 observations lost ), yielding the final sample of 176,583 children across 55 countries and 118  
2 surveys for our mortality study. Details of the samples for the child health outcomes are given in the appendix Table A1,  
3 these samples are smaller due to child anthropometric module not conducted in a number of surveys. The stunting data  
4 set is based on 119,018 children, the wasting data set is based on 120,246 children, the underweight data set is based on  
5 122,680 children, the diarrhoea data set is based on 135,121 children, and the anaemia data set is based on 31,520  
6 children.  
7  
8  
9  
10  
11  
12

### 13 **Outcome Measures**

14  
15  
16 In this study, we focus on six outcomes: infant mortality, child stunting, underweight, wasting, diarrhoea, and  
17 moderate anaemia. All measures are for children born 12-60 months prior to the interview. Infant mortality is a measure  
18 of whether or not the child survived to age 1 year. We also measure anthropometric failure. First, we calculate a z-score  
19 given by the child's height minus the median height for that child's age and sex in a reference population divided by the  
20 standard deviation of this group in the reference population. We use the World Health Organization reference  
21 population of health children in developing countries.<sup>30</sup> Stunting is defined as a height z-score of less than minus two.  
22 Similarly, underweight is defined as a z-score less than minus two for weight relative to children of the same sex and age  
23 in the reference population. Wasting is defined as a z-score less than minus two for weight-to-height relative to children  
24 of the same sex and age in the reference population. Biologically impossible values are defined by the WHO for height  
25 (stunting) as z-scores  $<-6$  or  $>6$ ; for weight (underweight) as  $<-6$  or  $>5$ ; and for weight for height (wasting) as  $<-5$  or  $>5$ .  
26 These observations with biologically impossible values are dropped from our samples.  
27  
28  
29  
30  
31  
32  
33  
34  
35  
36  
37  
38  
39  
40  
41  
42  
43

44 The outcome of child diarrhoea is based on the mother's recall of whether their child has had diarrhoea within  
45 the two weeks prior to interview. Anaemia is measured by a fingerstick blood test from the child at the time of  
46 interview. The first two drops of blood were discarded and the third drop was taken as a sample. The blood drop was  
47 analyzed using the HemoCue system. Adjustments for altitude are taken into account, and children with a haemoglobin  
48 concentration less than 11 grams per decilitre are considered as having moderate anaemia.  
49  
50  
51  
52  
53  
54  
55  
56  
57

### 58 **Exposure and Covariates**

1 In this study we classify the covariates into four different categories: child characteristics, maternal  
2 characteristics, paternal characteristics and finally household and social factors. The child characteristics are child sex,  
3 singleton or multiple births, and the age of child in months. The covariate for the age of child is not included in the infant  
4 mortality model (which depends only on survival to age one year) but is included in all other models. Children's age in  
5 months is categorized into four groups: 12-23, 24-35, 36-47, and 48-60.  
6  
7  
8  
9  
10

11 The maternal factors that we include in this study are mother's age, her height, and her educational attainment.  
12 Our exposure of interest in mother's age at the first birth. Age is categorized into three-year intervals: ages 12-14, 15-17,  
13 18-20, 21-23, 24-26, 27-29, 30-32 and 33-35. Not all surveys measure women's height. In our main results, we do not  
14 control for height but, since maternal height has been shown to be a predictor of child health,<sup>31</sup> we do perform a  
15 sensitivity analysis where we see the effect of adding maternal height as a covariate and restrict the sample to  
16 observations where mother's height is available. The height of the mother is in five categories: 100-144cm, 145-149cm,  
17 150-154cm, 155-159cm and 160-200cm. Maternal education is classified into three categories: no education or less  
18 than completed primary, completed primary, and completed secondary or higher. Paternal covariates are whether the  
19 women has a partner and if so the partner's age and education level. Partners are typically older than the women are  
20 and partner's age is split into six categories: 12-17, 18-23, 24-29, 30-35, 36-41, 42-59. Partner's education follows the  
21 same groupings as coded for mother's education: no education or less than completed primary, completed primary, and  
22 completed secondary or higher.  
23  
24  
25  
26  
27  
28  
29  
30  
31  
32  
33  
34  
35  
36  
37  
38

39 Household and social factors include the wealth quintile of the household and whether the household is in a  
40 rural or an urban location. The wealth quintile is a within-country measure of the wealth of the household relative to  
41 other households in that survey based on its ownership of household assets. We also include indicators for piped water  
42 to the house, and a flush toilet in household. In addition to these household measures, we include a cluster level  
43 measure: the percentage of living children aged 12-60 months who have received measles vaccination in the cluster.  
44 We do not have vaccination data for children who have died and the cluster level measles vaccination percentage allows  
45 us to control for neighbourhood health system inputs.  
46  
47  
48  
49  
50  
51  
52  
53  
54  
55  
56  
57

### 58 **Statistical Analysis**

59  
60

1 To measure the relative risk of a given outcome we applied a modified Poisson regression following Zou's<sup>9</sup>  
2 methodology. We estimate the unadjusted model only controlling for country fixed effects and survey-year dummies to  
3 account for the uneven repeated cross section. We then estimate the adjusted model and include the covariates. While  
4 summary statistics are weighted to take into account the multistage sampling design, the regressions are not  
5 weighted.<sup>32</sup>  
6  
7  
8  
9  
10

## 11 Results

### 12 Results: Summary Statistics

13  
14 In the infant mortality model (n=176,583 children) 23.9% of the women are between the ages of 15 and 17 at  
15 first birth and 35.2% are between the ages of 18 and 20 (Table 1). The reference group in the regression analysis is  
16 children whose mothers were aged 27-29 year old at first birth. This group represents 4.3% of the population with 7,648  
17 children. Children of multiple births are rare (0.8%), most women (92.9%) have partners, 60% of the children were born  
18 in rural areas, 43.6% have piped water to the house the remainder has to leave the house to collect water, and 30.9% of  
19 the children have a flush toilet at the house. Distributions of covariates are similar across the different outcome models  
20 (Table 1).  
21  
22  
23  
24  
25  
26  
27  
28  
29  
30  
31  
32  
33

34 In **Figure 1** we plot the prevalence of the child health outcome against the age of the mother at first birth. The  
35 weighted fraction of child health outcomes by age is an extension of the statistics reported in **Table 1** of child health  
36 outcomes by age band. We see that, in general, the prevalence of poor child health outcomes declines with mother's  
37 age to about age 27. The decline in poor child health outcomes with maternal age is particularly obvious for stunting,  
38 anaemia, and underweight, but is also evident for diarrhoea, infant mortality and wasting.  
39  
40  
41  
42  
43  
44  
45  
46  
47  
48  
49  
50  
51  
52  
53  
54  
55  
56  
57  
58  
59  
60

Table 1: Weighted Frequency and Distribution of First Born Children within Five Years of the Survey Aged 12-60 months Across Age of Mother at Birth and Other Covariates

|                                                                         | Infant Mortality |                   | Stunting   |                   | Underweight |                   | Wasting    |                   | Diarrhoea  |                   | Moderate Anaemia |                   |
|-------------------------------------------------------------------------|------------------|-------------------|------------|-------------------|-------------|-------------------|------------|-------------------|------------|-------------------|------------------|-------------------|
|                                                                         | Population       | Weighted Fraction | Population | Weighted Fraction | Population  | Weighted Fraction | Population | Weighted Fraction | Population | Weighted Fraction | Population       | Weighted Fraction |
|                                                                         | n=176,583        |                   | n=119,018  |                   | n=122,680   |                   | n=120,246  |                   | n=135,121  |                   | n=31,520         |                   |
| <b>Age Band of the Mother at First Birth</b>                            |                  |                   |            |                   |             |                   |            |                   |            |                   |                  |                   |
| 12-14                                                                   | 4,497            | 0.026             | 2,301      | 0.020             | 2443        | 0.020             | 2,379      | 0.020             | 2,851      | 0.021             | 514              | 0.016             |
| 15-17                                                                   | 42,233           | 0.239             | 25,882     | 0.219             | 26839       | 0.220             | 26,335     | 0.220             | 30,011     | 0.222             | 6,531            | 0.203             |
| 18-20                                                                   | 62,091           | 0.352             | 41,492     | 0.351             | 42868       | 0.352             | 42,054     | 0.352             | 47,425     | 0.351             | 11,753           | 0.366             |
| 21-23                                                                   | 37,757           | 0.214             | 26,427     | 0.224             | 27127       | 0.223             | 26,594     | 0.223             | 29,927     | 0.222             | 7,563            | 0.236             |
| 24-26                                                                   | 17,383           | 0.099             | 12,669     | 0.107             | 12936       | 0.106             | 12,690     | 0.106             | 14,258     | 0.106             | 3,355            | 0.105             |
| 27-29                                                                   | 7,648            | 0.043             | 5,722      | 0.048             | 5883        | 0.048             | 5,771      | 0.048             | 6,480      | 0.048             | 1,481            | 0.046             |
| 30-32                                                                   | 3,377            | 0.019             | 2,566      | 0.022             | 2616        | 0.022             | 2,547      | 0.021             | 2,884      | 0.021             | 650              | 0.020             |
| 33-35                                                                   | 1,399            | 0.008             | 1,075      | 0.009             | 1085        | 0.009             | 1,075      | 0.009             | 1,203      | 0.009             | 249              | 0.008             |
| <b>Sex of Child</b>                                                     |                  |                   |            |                   |             |                   |            |                   |            |                   |                  |                   |
| Male                                                                    | 90,302           | 0.512             | 59,709     | 0.505             | 61867       | 0.508             | 60,577     | 0.507             | 68,501     | 0.507             | 16,438           | 0.512             |
| Female                                                                  | 86,083           | 0.488             | 58,424     | 0.495             | 59929       | 0.492             | 58,867     | 0.493             | 66,539     | 0.493             | 15,658           | 0.488             |
| <b>Type of Birth</b>                                                    |                  |                   |            |                   |             |                   |            |                   |            |                   |                  |                   |
| Singleton                                                               | 174,947          | 0.992             | 117,235    | 0.992             | 120853      | 0.992             | 118,515    | 0.992             | 134,004    | 0.992             | 31,850           | 0.992             |
| Twin                                                                    | 1,438            | 0.008             | 898        | 0.008             | 944         | 0.008             | 930        | 0.008             | 1,036      | 0.008             | 247              | 0.008             |
| <b>Age of Child in Months</b>                                           |                  |                   |            |                   |             |                   |            |                   |            |                   |                  |                   |
| 48-60 months                                                            | 44,542           | 0.253             | 24,472     | 0.207             | 24780       | 0.203             | 24,353     | 0.204             | 27,013     | 0.200             | 7,552            | 0.235             |
| 36-47 months                                                            | 42,793           | 0.243             | 26,908     | 0.228             | 27694       | 0.227             | 27,210     | 0.228             | 31,330     | 0.232             | 7,867            | 0.245             |
| 24-35 months                                                            | 43,082           | 0.244             | 31,485     | 0.267             | 32603       | 0.268             | 31,950     | 0.267             | 36,595     | 0.271             | 7,961            | 0.248             |
| 12-23 months                                                            | 45,968           | 0.261             | 35,268     | 0.299             | 36718       | 0.301             | 35,932     | 0.301             | 40,101     | 0.297             | 8,717            | 0.272             |
| <b>Education Level of the Mother at Time of Interview</b>               |                  |                   |            |                   |             |                   |            |                   |            |                   |                  |                   |
| Secondary or higher                                                     | 36,152           | 0.205             | 27,729     | 0.235             | 28308       | 0.232             | 27,757     | 0.232             | 31,177     | 0.231             | 6,562            | 0.204             |
| Completed primary                                                       | 57,645           | 0.327             | 40,543     | 0.343             | 41341       | 0.339             | 40,673     | 0.341             | 45,720     | 0.339             | 12,739           | 0.397             |
| No education or incomplete primary                                      | 82,589           | 0.468             | 49,862     | 0.422             | 52147       | 0.428             | 51,015     | 0.427             | 58,142     | 0.431             | 12,796           | 0.399             |
| <b>Mother has a Partner</b>                                             |                  |                   |            |                   |             |                   |            |                   |            |                   |                  |                   |
| Yes                                                                     | 163,858          | 0.929             | 109,350    | 0.926             | 112890      | 0.927             | 110,666    | 0.927             | 125,468    | 0.929             | 30,192           | 0.941             |
| No                                                                      | 12,527           | 0.071             | 8,784      | 0.074             | 8906        | 0.073             | 8,779      | 0.074             | 9,572      | 0.071             | 1,904            | 0.059             |
| <b>Education Level of the Mother's Partner at the Time of Interview</b> |                  |                   |            |                   |             |                   |            |                   |            |                   |                  |                   |
| Completed Secondary or Higher                                           | 54,943           | 0.311             | 39,434     | 0.334             | 40422       | 0.332             | 39,640     | 0.332             | 44,409     | 0.329             | 8,891            | 0.277             |
| Completed primary                                                       | 56,655           | 0.321             | 38,884     | 0.329             | 39920       | 0.328             | 39,216     | 0.328             | 44,217     | 0.327             | 12,180           | 0.379             |
| No education or incomplete primary                                      | 64,787           | 0.367             | 39,815     | 0.337             | 41455       | 0.340             | 40,589     | 0.340             | 46,414     | 0.344             | 11,025           | 0.344             |

**Age Band of the Mother's Partner at the Birth of the Mother's First Birth**

|   |              |         |       |        |       |       |       |        |       |        |       |        |       |
|---|--------------|---------|-------|--------|-------|-------|-------|--------|-------|--------|-------|--------|-------|
| 1 | 12-17        | 2,104   | 0.012 | 1,224  | 0.010 | 1236  | 0.010 | 1,211  | 0.010 | 1,409  | 0.010 | 373    | 0.012 |
| 2 | 18-23        | 40,271  | 0.228 | 27,180 | 0.230 | 28018 | 0.230 | 27,483 | 0.230 | 30,594 | 0.227 | 9,132  | 0.285 |
| 3 | <b>24-29</b> | 101,722 | 0.577 | 66,806 | 0.566 | 68828 | 0.565 | 67,569 | 0.566 | 77,555 | 0.574 | 15,792 | 0.492 |
| 4 | 30-35        | 22,072  | 0.125 | 15,954 | 0.135 | 16483 | 0.135 | 16,125 | 0.135 | 17,661 | 0.131 | 4,797  | 0.149 |
| 5 | 36-41        | 6,768   | 0.038 | 4,685  | 0.040 | 4846  | 0.040 | 4,724  | 0.040 | 5,266  | 0.039 | 1,342  | 0.042 |
| 6 | 42-59        | 3,448   | 0.020 | 2,284  | 0.019 | 2385  | 0.020 | 2,332  | 0.020 | 2,555  | 0.019 | 660    | 0.021 |

**Wealth Quintile of the Child's Household**

|    |                |        |       |        |       |       |       |        |       |        |       |       |       |
|----|----------------|--------|-------|--------|-------|-------|-------|--------|-------|--------|-------|-------|-------|
| 9  | <b>Richest</b> | 36,825 | 0.209 | 24,886 | 0.211 | 25377 | 0.208 | 24,876 | 0.208 | 28,741 | 0.213 | 6,550 | 0.204 |
| 10 | Rich           | 37,749 | 0.214 | 25,955 | 0.220 | 26597 | 0.218 | 26,150 | 0.219 | 29,413 | 0.218 | 6,961 | 0.217 |
| 11 | Middle         | 36,203 | 0.205 | 24,554 | 0.208 | 25319 | 0.208 | 24,853 | 0.208 | 27,932 | 0.207 | 6,795 | 0.212 |
| 12 | Poorer         | 34,324 | 0.195 | 22,705 | 0.192 | 23517 | 0.193 | 23,053 | 0.193 | 25,834 | 0.191 | 6,138 | 0.191 |
| 13 | Poorest        | 31,285 | 0.177 | 20,035 | 0.170 | 20986 | 0.172 | 20,512 | 0.172 | 23,120 | 0.171 | 5,653 | 0.176 |

**Residence of the Child's Household at the Time of Interview**

|    |              |         |       |        |       |       |       |        |       |        |       |        |       |
|----|--------------|---------|-------|--------|-------|-------|-------|--------|-------|--------|-------|--------|-------|
| 16 | <b>Urban</b> | 70,395  | 0.399 | 50,428 | 0.427 | 51491 | 0.423 | 50,597 | 0.424 | 57,358 | 0.425 | 12,301 | 0.383 |
| 17 | Rural        | 105,990 | 0.601 | 67,706 | 0.573 | 70305 | 0.577 | 68,848 | 0.576 | 77,682 | 0.575 | 19,796 | 0.617 |

**Water Piped to Child's House**

|    |                          |        |       |        |       |       |       |        |       |        |       |        |       |
|----|--------------------------|--------|-------|--------|-------|-------|-------|--------|-------|--------|-------|--------|-------|
| 20 | <b>Piped to House</b>    | 76,844 | 0.436 | 55,481 | 0.470 | 56699 | 0.466 | 55,714 | 0.466 | 62,499 | 0.463 | 14,306 | 0.446 |
| 21 | Water not piped to house | 99,542 | 0.564 | 62,653 | 0.530 | 65097 | 0.534 | 63,731 | 0.534 | 72,542 | 0.537 | 17,790 | 0.554 |

**Flush Toilet at Child's House**

|    |                              |         |       |        |       |       |       |        |       |        |       |        |       |
|----|------------------------------|---------|-------|--------|-------|-------|-------|--------|-------|--------|-------|--------|-------|
| 24 | <b>Flush Toilet at House</b> | 54,418  | 0.309 | 41,542 | 0.352 | 42402 | 0.348 | 41,686 | 0.349 | 46,955 | 0.348 | 10,511 | 0.327 |
| 25 | No Flush Toilet at House     | 121,968 | 0.691 | 76,592 | 0.648 | 79394 | 0.652 | 77,759 | 0.651 | 88,085 | 0.652 | 21,586 | 0.673 |

**Child Measles Vaccination**

|    |                              |  |       |  |       |  |       |  |       |  |       |  |       |
|----|------------------------------|--|-------|--|-------|--|-------|--|-------|--|-------|--|-------|
| 27 | <b>Cluster Weighted Mean</b> |  | 0.234 |  | 0.204 |  | 0.208 |  | 0.208 |  | 0.214 |  | 0.211 |
|----|------------------------------|--|-------|--|-------|--|-------|--|-------|--|-------|--|-------|

1  
2  
3 Older women are more likely to have multiple births, although the event is rare across all age groups. Young  
4  
5 mothers are less likely to have a partner: 8.6% of 15-17 year olds mothers do not have a partner compared to 5.8% of  
6  
7 women in the 27-29 year old category (Table 2). Young mothers have lower education than older mothers do: 64.6% of  
8  
9 mothers aged 15-17 had incomplete primary or no schooling, whereas 23.1% of women who had their first birth  
10  
11 between the ages of 27-29 had only incomplete primary or no schooling (Table 2). Older mothers tend to be in a higher  
12  
13 wealth quintile: 42.9% of women who had their first birth between the ages of 27-29 are in the richest quintile while  
14  
15 11.7% of mothers age 15-17 are in the richest quintile (Table 2). 71.2% of mothers who had their first birth between the  
16  
17 ages of 15 and 17 live in rural areas, while 35% of women who have their first birth between the ages of 27-29 live in  
18  
19 rural areas (Table 2). Delaying first birth is more likely in urban areas. Women who have their first birth later are also  
20  
21 more likely to live in conditions that are more sanitary: 57.3% of women who have their first birth between the ages of  
22  
23 27 and 29 have a flush toilet at the house compared to 16.4% of 15-17 year old first time mothers (Table 2).  
24  
25  
26

27  
28 Women who delay their first birth are more educated, more likely to have a partner, are richer, more likely to  
29  
30 live in an urban area, and more likely to live in better sanitary conditions. Young mothers tend to have lower educational  
31  
32 socio-economic characteristics. In the following analysis, we present both unadjusted results and results that control for  
33  
34 these covariates (Table 2).  
35  
36  
37  
38  
39  
40  
41  
42  
43  
44  
45  
46  
47  
48  
49  
50  
51  
52  
53  
54  
55  
56  
57  
58  
59  
60

Table 2: Weighted Frequency and Distribution Covariates Across Age of Mother at Birth

| Age Band                                                                         | 12-14<br>Pop. W'ted Frac.<br>n=4,322 | 15-17<br>Pop. W'ted Frac.<br>n=41,384 | 18-20<br>Pop. W'ted Frac.<br>n=61,491 | 21-23<br>Pop. W'ted Frac.<br>n=38,300 | 24-26<br>Pop. W'ted Frac.<br>n=18,211 | 27-29<br>Pop. W'ted Frac.<br>n=7,939 | 30-32<br>Pop. W'ted Frac.<br>n=3,493 | 33-35<br>Pop. W'ted Frac.<br>n=1,443 |
|----------------------------------------------------------------------------------|--------------------------------------|---------------------------------------|---------------------------------------|---------------------------------------|---------------------------------------|--------------------------------------|--------------------------------------|--------------------------------------|
| <b>Sex of Child</b>                                                              |                                      |                                       |                                       |                                       |                                       |                                      |                                      |                                      |
| Male                                                                             | 2,323 0.517                          | 21,627 0.512                          | 31,995 0.515                          | 19,017 0.504                          | 8,941 0.514                           | 3,964 0.518                          | 1,731 0.513                          | 705 0.504                            |
| Female                                                                           | 2,173 0.483                          | 20,607 0.488                          | 30,096 0.485                          | 18,741 0.496                          | 8,443 0.486                           | 3,685 0.482                          | 1,646 0.487                          | 694 0.496                            |
| <b>Type of Birth</b>                                                             |                                      |                                       |                                       |                                       |                                       |                                      |                                      |                                      |
| Singleton                                                                        | 4,477 0.996                          | 42,003 0.995                          | 61,701 0.994                          | 37,376 0.990                          | 17,173 0.988                          | 7,532 0.985                          | 3,317 0.982                          | 1,369 0.979                          |
| Twin                                                                             | 19 0.004                             | 230 0.005                             | 390 0.006                             | 382 0.010                             | 211 0.012                             | 116 0.015                            | 60 0.018                             | 30 0.021                             |
| <b>Age of Child in Months</b>                                                    |                                      |                                       |                                       |                                       |                                       |                                      |                                      |                                      |
| 48-60 months                                                                     | 1,380 0.307                          | 11,154 0.264                          | 15,402 0.248                          | 9,272 0.246                           | 4,269 0.246                           | 1,841 0.241                          | 890 0.263                            | 335 0.240                            |
| 36-47 months                                                                     | 1,260 0.280                          | 10,537 0.249                          | 14,491 0.233                          | 9,378 0.248                           | 4,176 0.240                           | 1,822 0.238                          | 822 0.243                            | 307 0.219                            |
| 24-35 months                                                                     | 995 0.221                            | 10,125 0.240                          | 15,252 0.246                          | 9,419 0.249                           | 4,191 0.241                           | 1,885 0.246                          | 839 0.248                            | 376 0.269                            |
| 12-23 months                                                                     | 862 0.192                            | 10,418 0.247                          | 16,946 0.273                          | 9,687 0.257                           | 4,748 0.273                           | 2,100 0.275                          | 827 0.245                            | 381 0.272                            |
| <b>Education Level of the Mother at Time of Interview</b>                        |                                      |                                       |                                       |                                       |                                       |                                      |                                      |                                      |
| Secondary or higher                                                              | 30 0.007                             | 1,518 0.036                           | 9,263 0.149                           | 11,213 0.297                          | 7,607 0.438                           | 3,979 0.520                          | 1,836 0.544                          | 705 0.504                            |
| Completed primary                                                                | 957 0.213                            | 13,415 0.318                          | 22,837 0.368                          | 12,459 0.330                          | 4,961 0.285                           | 1,899 0.248                          | 781 0.231                            | 336 0.241                            |
| No education or incomplete primary                                               | 3,509 0.780                          | 27,300 0.646                          | 29,991 0.483                          | 14,085 0.373                          | 4,816 0.277                           | 1,770 0.231                          | 760 0.225                            | 357 0.256                            |
| <b>Mother has a Partner</b>                                                      |                                      |                                       |                                       |                                       |                                       |                                      |                                      |                                      |
| Yes                                                                              | 4,101 0.912                          | 38,606 0.914                          | 57,623 0.928                          | 35,469 0.939                          | 16,378 0.942                          | 7,208 0.942                          | 3,181 0.942                          | 1,291 0.923                          |
| No                                                                               | 395 0.088                            | 3,627 0.086                           | 4,468 0.072                           | 2,288 0.061                           | 1,006 0.058                           | 440 0.058                            | 196 0.058                            | 108 0.077                            |
| <b>Education Level of the Mother's Partner at the Time of Interview</b>          |                                      |                                       |                                       |                                       |                                       |                                      |                                      |                                      |
| Completed Secondary or Higher                                                    | 669 0.149                            | 8,265 0.196                           | 17,087 0.275                          | 14,040 0.372                          | 8,148 0.469                           | 4,113 0.538                          | 1,876 0.556                          | 746 0.533                            |
| Completed primary                                                                | 1,107 0.246                          | 12,977 0.307                          | 21,683 0.349                          | 12,533 0.332                          | 5,193 0.299                           | 2,031 0.266                          | 802 0.238                            | 328 0.235                            |
| No education or incomplete primary                                               | 2,721 0.605                          | 20,992 0.497                          | 23,321 0.376                          | 11,184 0.296                          | 4,042 0.233                           | 1,504 0.197                          | 699 0.207                            | 325 0.232                            |
| <b>Age Band of the Mother's Partner at the Birth of the Mother's First Birth</b> |                                      |                                       |                                       |                                       |                                       |                                      |                                      |                                      |
| 12-17                                                                            | 313 0.070                            | 1,250 0.030                           | 407 0.007                             | 109 0.003                             | 20 0.001                              | 4 0.001                              | 1 0.000                              | 1 0.000                              |
| 18-23                                                                            | 1,587 0.353                          | 14,655 0.347                          | 17,407 0.280                          | 5,426 0.144                           | 898 0.052                             | 227 0.030                            | 55 0.016                             | 17 0.012                             |
| 24-29                                                                            | 2,256 0.502                          | 22,157 0.525                          | 36,519 0.588                          | 24,543 0.650                          | 10,869 0.625                          | 3,671 0.480                          | 1,220 0.361                          | 487 0.348                            |
| 30-35                                                                            | 214 0.048                            | 2,756 0.065                           | 5,480 0.088                           | 5,634 0.149                           | 3,981 0.229                           | 2,491 0.326                          | 1,203 0.356                          | 313 0.223                            |
| 36-41                                                                            | 83 0.019                             | 896 0.021                             | 1,467 0.024                           | 1,319 0.035                           | 1,155 0.066                           | 848 0.111                            | 631 0.187                            | 371 0.265                            |
| 42-59                                                                            | 44 0.010                             | 520 0.012                             | 812 0.013                             | 727 0.019                             | 461 0.027                             | 407 0.053                            | 267 0.079                            | 211 0.151                            |
| <b>Wealth Quintile of the Child's Household</b>                                  |                                      |                                       |                                       |                                       |                                       |                                      |                                      |                                      |
| Richest                                                                          | 366 0.081                            | 4,937 0.117                           | 10,572 0.170                          | 9,490 0.251                           | 6,196 0.356                           | 3,283 0.429                          | 1,423 0.421                          | 557 0.398                            |
| Rich                                                                             | 710 0.158                            | 7,659 0.181                           | 13,466 0.217                          | 9,088 0.241                           | 3,972 0.228                           | 1,700 0.222                          | 815 0.241                            | 340 0.243                            |
| Middle                                                                           | 950 0.211                            | 9,159 0.217                           | 13,772 0.222                          | 7,453 0.197                           | 2,950 0.170                           | 1,185 0.155                          | 517 0.153                            | 216 0.154                            |
| Poorer                                                                           | 1,194 0.265                          | 10,329 0.245                          | 12,770 0.206                          | 6,330 0.168                           | 2,354 0.135                           | 838 0.110                            | 350 0.103                            | 160 0.114                            |
| Poorest                                                                          | 1,277 0.284                          | 10,148 0.240                          | 11,511 0.185                          | 5,397 0.143                           | 1,911 0.110                           | 642 0.084                            | 273 0.081                            | 126 0.090                            |

|    |                                                                    |             |              |              |              |             |             |             |           |
|----|--------------------------------------------------------------------|-------------|--------------|--------------|--------------|-------------|-------------|-------------|-----------|
| 1  | <b>Residence of the Child's Household at the Time of Interview</b> |             |              |              |              |             |             |             |           |
| 2  | <b>Urban</b>                                                       | 1,033 0.230 | 12,159 0.288 | 22,251 0.358 | 16,999 0.450 | 9,721 0.559 | 4,969 0.650 | 2,315 0.686 | 949 0.678 |
| 3  | Rural                                                              | 3,463 0.770 | 30,074 0.712 | 39,840 0.642 | 20,759 0.550 | 7,663 0.441 | 2,679 0.350 | 1,062 0.314 | 450 0.322 |
| 4  |                                                                    |             |              |              |              |             |             |             |           |
| 5  | <b>Water Piped to Child's House</b>                                |             |              |              |              |             |             |             |           |
| 6  | <b>Piped to House</b>                                              | 1,082 0.241 | 13,530 0.320 | 25,731 0.414 | 18,816 0.498 | 9,906 0.570 | 4,736 0.619 | 2,149 0.636 | 896 0.640 |
| 7  | Water not piped to house                                           | 3,415 0.759 | 28,704 0.680 | 36,360 0.586 | 18,942 0.502 | 7,478 0.430 | 2,912 0.381 | 1,228 0.364 | 503 0.360 |
| 8  |                                                                    |             |              |              |              |             |             |             |           |
| 9  | <b>Flush Toilet at Child's House</b>                               |             |              |              |              |             |             |             |           |
| 10 | <b>Flush Toilet at House</b>                                       | 434 0.097   | 6,908 0.164  | 16,700 0.269 | 14,506 0.384 | 8,551 0.492 | 4,380 0.573 | 2,080 0.616 | 859 0.614 |
| 11 | No Flush Toilet at House                                           | 4,062 0.903 | 35,325 0.836 | 45,390 0.731 | 23,251 0.616 | 8,832 0.508 | 3,269 0.427 | 1,297 0.384 | 540 0.386 |
| 12 |                                                                    |             |              |              |              |             |             |             |           |
| 13 | <b>Child Measles Vaccination</b>                                   |             |              |              |              |             |             |             |           |
| 14 | <b>Cluster Weighted Mean</b>                                       | 0.359       | 0.298        | 0.238        | 0.202        | 0.166       | 0.145       | 0.125       | 0.139     |

For peer review only

15  
16  
17  
18  
19  
20  
21  
22  
23  
24  
25  
26  
27  
28  
29  
30  
31  
32  
33  
34  
35  
36  
37  
38  
39  
40  
41  
42  
43  
44  
45  
46  
47  
48  
49



### Results: Unadjusted and Adjusted Models

The unadjusted pooled results indicate that the risk of infant mortality is lowest for women who have their first birth between the ages of 27-29 (Table A2). The relative risk ratio declines as age increases between the ages of 12 and 26, and comes to a minimum for 27-29 year olds (Table A2). The relative risk ratio then increases for women who have their first birth at 33-35 (Table A2). This same U-shape is exhibited in many of the country specific unadjusted regressions. Benin, Bolivia, India, Senegal and Tanzania are examples where the child survival is maximized if the first birth is delayed to the ages of 27-29, and most countries follow this pattern (Table A2).

Age of the mother at first birth is a risk factor for infant mortality and adverse child health outcomes even when we control for maternal, paternal, and household and social characteristics (Table 3). The relative risk ratios of each age group (relative to 27-29 year olds who are the reference group) and 95% confidence intervals are plotted in **Figure 2**. Child health outcomes improve in age of the mother at first birth through to age 27-29 and in some cases 30-32 (except for wasting) even after controlling for maternal, paternal, household and social factor covariates (Table 3, Figure 2).

Maternal and paternal age have different effects on child health outcomes (Table 3). If being a young mother is associated with low socioeconomic status in ways we have not controlled for, maternal age at first birth may simply be a proxy for socioeconomic status. However if this were true, we would expect the effect of young fathers to be similar to that of mothers (Subramanian *et al.*<sup>33</sup> put forward this idea of looking at the differential effects of maternal and paternal indicators on child health as a method of distinguishing between biological and social mechanisms). In the cases of infant mortality, underweight, wasting, and anaemia, maternal and paternal age have approximately equal relative risk indicating the role of social mechanisms (Table 3). In the case of stunting and diarrhoea, while having a very young father increases the relative risk of poor child health outcomes, the effect is significantly smaller than that of the mother's age strengthening the case that the effect has a biological component for these two child health outcomes (Table 3).

Table 3: Adjusted Relative Risk of Infant Mortality and Child Health Outcome by Age of Mother at First Birth

|                                                                                  | Infant Mortality         | Stunting                 | Underweight              | Wasting                  | Diarrhoea                | Moderate Anaemia         |
|----------------------------------------------------------------------------------|--------------------------|--------------------------|--------------------------|--------------------------|--------------------------|--------------------------|
| <b>Age Band of the Mother at First Birth</b>                                     |                          |                          |                          |                          |                          |                          |
| <b>27-29 (Reference)</b>                                                         | 1.00                     | 1.00                     | 1.00                     | 1.00                     | 1.00                     | 1.00                     |
| 12-14                                                                            | 1.703<br>(1.478 - 1.962) | 1.507<br>(1.416 - 1.603) | 1.351<br>(1.236 - 1.477) | 1.027<br>(0.870 - 1.211) | 1.365<br>(1.216 - 1.533) | 1.315<br>(1.131 - 1.528) |
| 15-17                                                                            | 1.307<br>(1.160 - 1.474) | 1.341<br>(1.274 - 1.412) | 1.218<br>(1.131 - 1.313) | 1.040<br>(0.923 - 1.170) | 1.326<br>(1.224 - 1.436) | 1.357<br>(1.222 - 1.507) |
| 18-20                                                                            | 1.083<br>(0.963 - 1.219) | 1.272<br>(1.210 - 1.338) | 1.122<br>(1.043 - 1.207) | 1.007<br>(0.899 - 1.129) | 1.244<br>(1.151 - 1.343) | 1.327<br>(1.200 - 1.468) |
| 21-23                                                                            | 1.018<br>(0.903 - 1.148) | 1.191<br>(1.132 - 1.254) | 1.052<br>(0.976 - 1.132) | 1.018<br>(0.908 - 1.141) | 1.227<br>(1.135 - 1.326) | 1.349<br>(1.219 - 1.493) |
| 24-26                                                                            | 1.079<br>(0.948 - 1.228) | 1.087<br>(1.028 - 1.148) | 0.989<br>(0.912 - 1.071) | 1.004<br>(0.889 - 1.135) | 1.108<br>(1.019 - 1.203) | 1.239<br>(1.114 - 1.378) |
| 30-32                                                                            | 1.191<br>(0.981 - 1.445) | 0.925<br>(0.845 - 1.013) | 0.824<br>(0.717 - 0.947) | 0.915<br>(0.749 - 1.119) | 0.979<br>(0.860 - 1.115) | 1.117<br>(0.947 - 1.317) |
| 33-35                                                                            | 1.340<br>(1.041 - 1.725) | 1.025<br>(0.908 - 1.156) | 0.872<br>(0.715 - 1.062) | 0.976<br>(0.733 - 1.299) | 0.831<br>(0.687 - 1.006) | 1.079<br>(0.854 - 1.362) |
| <b>Sex of Child</b>                                                              |                          |                          |                          |                          |                          |                          |
| <b>Male (Reference)</b>                                                          | 1.00                     | 1.00                     | 1.00                     | 1.00                     | 1.00                     | 1.00                     |
| Female                                                                           | 0.787<br>(0.759 - 0.815) | 0.900<br>(0.888 - 0.913) | 0.915<br>(0.895 - 0.935) | 0.854<br>(0.821 - 0.889) | 0.927<br>(0.903 - 0.951) | 0.956<br>(0.927 - 0.985) |
| <b>Type of Birth</b>                                                             |                          |                          |                          |                          |                          |                          |
| <b>Singleton (Reference)</b>                                                     | 1.00                     | 1.00                     | 1.00                     | 1.00                     | 1.00                     | 1.00                     |
| Twin                                                                             | 4.998<br>(4.609 - 5.421) | 1.302<br>(1.207 - 1.404) | 1.627<br>(1.459 - 1.814) | 1.264<br>(1.018 - 1.570) | 0.918<br>(0.782 - 1.077) | 1.135<br>(0.963 - 1.337) |
| <b>Age of Child in Months</b>                                                    |                          |                          |                          |                          |                          |                          |
| <b>48-59 months (Reference)</b>                                                  |                          | 1.00                     | 1.00                     | 1.00                     | 1.00                     | 1.00                     |
| 36-47 months                                                                     |                          | 1.146<br>(1.119 - 1.174) | 1.023<br>(0.986 - 1.062) | 0.986<br>(0.916 - 1.060) | 1.392<br>(1.311 - 1.477) | 1.219<br>(1.147 - 1.296) |
| 24-35 months                                                                     |                          | 1.246<br>(1.217 - 1.275) | 1.123<br>(1.083 - 1.164) | 1.145<br>(1.066 - 1.229) | 2.446<br>(2.316 - 2.582) | 1.609<br>(1.513 - 1.711) |
| 12-23 months                                                                     |                          | 1.169<br>(1.141 - 1.198) | 1.114<br>(1.073 - 1.156) | 1.572<br>(1.466 - 1.686) | 3.818<br>(3.625 - 4.021) | 2.240<br>(2.102 - 2.386) |
| <b>Education Level of the Mother at Time of Interview</b>                        |                          |                          |                          |                          |                          |                          |
| <b>Secondary or Higher (Reference)</b>                                           | 1.00                     | 1.00                     | 1.00                     | 1.00                     | 1.00                     | 1.00                     |
| Completed Primary                                                                | 1.266<br>(1.160 - 1.382) | 1.286<br>(1.243 - 1.329) | 1.282<br>(1.214 - 1.354) | 1.022<br>(0.945 - 1.105) | 1.143<br>(1.092 - 1.196) | 1.079<br>(1.009 - 1.154) |
| No education or incomplete primary                                               | 1.626<br>(1.480 - 1.786) | 1.482<br>(1.429 - 1.536) | 1.586<br>(1.495 - 1.681) | 1.243<br>(1.141 - 1.355) | 1.192<br>(1.131 - 1.256) | 1.159<br>(1.075 - 1.248) |
| <b>Mother has a Partner</b>                                                      |                          |                          |                          |                          |                          |                          |
| <b>Yes (Reference)</b>                                                           | 1.00                     | 1.00                     | 1.00                     | 1.00                     | 1.00                     | 1.00                     |
| No                                                                               | 0.977<br>(0.881 - 1.084) | 1.148<br>(1.106 - 1.193) | 1.237<br>(1.158 - 1.322) | 1.232<br>(1.101 - 1.379) | 1.105<br>(1.043 - 1.170) | 1.110<br>(1.022 - 1.206) |
| <b>Education Level of the Mother's Partner at the Time of Interview</b>          |                          |                          |                          |                          |                          |                          |
| <b>Higher (Reference)</b>                                                        | 1.00                     | 1.00                     | 1.00                     | 1.00                     | 1.00                     | 1.00                     |
| Completed primary                                                                | 1.099<br>(1.027 - 1.176) | 1.068<br>(1.040 - 1.097) | 1.097<br>(1.052 - 1.144) | 1.037<br>(0.969 - 1.109) | 1.059<br>(1.015 - 1.104) | 1.053<br>(0.993 - 1.117) |
| No education or incomplete primary                                               | 1.232<br>(1.147 - 1.324) | 1.131<br>(1.099 - 1.163) | 1.233<br>(1.180 - 1.288) | 1.151<br>(1.070 - 1.238) | 1.068<br>(1.019 - 1.120) | 1.098<br>(1.029 - 1.172) |
| <b>Age Band of the Mother's Partner at the Birth of the Mother's First Birth</b> |                          |                          |                          |                          |                          |                          |
| <b>24-29 (Reference)</b>                                                         | 1.00                     | 1.00                     | 1.00                     | 1.00                     | 1.00                     | 1.00                     |
| 12-17                                                                            | 1.410<br>(1.237 - 1.606) | 1.148<br>(1.081 - 1.219) | 1.125<br>(1.017 - 1.245) | 1.008<br>(0.801 - 1.269) | 1.049<br>(0.932 - 1.181) | 1.090<br>(0.937 - 1.269) |
| 18-23                                                                            | 1.077<br>(1.026 - 1.130) | 1.054<br>(1.035 - 1.073) | 1.026<br>(0.997 - 1.056) | 0.979<br>(0.927 - 1.034) | 1.032<br>(0.997 - 1.068) | 1.050<br>(1.010 - 1.092) |
| 30-35                                                                            | 0.942<br>(0.884 - 1.005) | 0.964<br>(0.939 - 0.990) | 0.953<br>(0.918 - 0.990) | 0.941<br>(0.882 - 1.004) | 0.958<br>(0.915 - 1.002) | 0.997<br>(0.949 - 1.046) |
| 36-41                                                                            | 0.996                    | 0.986                    | 0.932                    | 0.929                    | 1.032                    | 1.069                    |

|    |                                                                    |                 |                 |                 |                 |                 |                 |
|----|--------------------------------------------------------------------|-----------------|-----------------|-----------------|-----------------|-----------------|-----------------|
| 1  | 42-59                                                              | (0.904 - 1.097) | (0.945 - 1.028) | (0.875 - 0.992) | (0.835 - 1.034) | (0.960 - 1.108) | (0.994 - 1.149) |
| 2  |                                                                    | 1.046           | 1.036           | 1.030           | 0.977           | 1.101           | 0.962           |
| 3  |                                                                    | (0.932 - 1.173) | (0.983 - 1.093) | (0.954 - 1.111) | (0.855 - 1.118) | (1.004 - 1.207) | (0.874 - 1.060) |
| 4  | <b>Wealth Quintile of the Child's Household</b>                    |                 |                 |                 |                 |                 |                 |
| 5  | <b>Richest (Reference)</b>                                         | 1.00            | 1.00            | 1.00            | 1.00            | 1.00            | 1.00            |
| 6  | Rich                                                               | 1.138           | 1.182           | 1.272           | 1.110           | 1.171           | 1.157           |
| 7  |                                                                    | (1.063 - 1.219) | (1.148 - 1.216) | (1.216 - 1.331) | (1.032 - 1.194) | (1.117 - 1.227) | (1.093 - 1.224) |
| 8  | Middle                                                             | 1.223           | 1.257           | 1.416           | 1.276           | 1.209           | 1.246           |
| 9  |                                                                    | (1.136 - 1.316) | (1.218 - 1.297) | (1.348 - 1.486) | (1.176 - 1.384) | (1.149 - 1.272) | (1.170 - 1.326) |
| 10 | Poorer                                                             | 1.268           | 1.332           | 1.524           | 1.344           | 1.244           | 1.287           |
| 11 |                                                                    | (1.173 - 1.371) | (1.289 - 1.376) | (1.448 - 1.604) | (1.233 - 1.466) | (1.177 - 1.314) | (1.203 - 1.378) |
| 12 | Poorest                                                            | 1.289           | 1.445           | 1.671           | 1.458           | 1.289           | 1.338           |
| 13 |                                                                    | (1.187 - 1.399) | (1.397 - 1.496) | (1.585 - 1.762) | (1.331 - 1.598) | (1.213 - 1.369) | (1.245 - 1.438) |
| 14 | <b>Residence of the Child's Household at the Time of Interview</b> |                 |                 |                 |                 |                 |                 |
| 15 | <b>Urban (Reference)</b>                                           | 1.00            | 1.00            | 1.00            | 1.00            | 1.00            | 1.00            |
| 16 | Rural                                                              | 1.043           | 1.082           | 1.029           | 0.943           | 0.939           | 0.981           |
| 17 |                                                                    | (0.991 - 1.099) | (1.059 - 1.106) | (0.996 - 1.064) | (0.891 - 0.998) | (0.905 - 0.974) | (0.937 - 1.026) |
| 18 | <b>Water Piped to the Child's House</b>                            |                 |                 |                 |                 |                 |                 |
| 19 | <b>Piped to house (Reference)</b>                                  | 1.00            | 1.00            | 1.00            | 1.00            | 1.00            | 1.00            |
| 20 | Water not piped to house                                           | 1.100           | 0.956           | 1.031           | 1.034           | 1.002           | 0.988           |
| 21 |                                                                    | (1.047 - 1.156) | (0.938 - 0.975) | (1.000 - 1.063) | (0.980 - 1.092) | (0.969 - 1.037) | (0.950 - 1.029) |
| 22 | <b>Flush Toilet at Child's House</b>                               |                 |                 |                 |                 |                 |                 |
| 23 | <b>Flush toilet at house (Reference)</b>                           | 1.00            | 1.00            | 1.00            | 1.00            | 1.00            | 1.00            |
| 24 | No flush toilet at house                                           | 1.137           | 1.224           | 1.137           | 1.045           | 1.041           | 1.035           |
| 25 |                                                                    | (1.062 - 1.217) | (1.191 - 1.259) | (1.091 - 1.184) | (0.978 - 1.116) | (0.997 - 1.087) | (0.982 - 1.090) |
| 26 | <b>Child Measles Vaccination</b>                                   |                 |                 |                 |                 |                 |                 |
| 27 | <b>Vaccinated (Reference)</b>                                      | 1.00            | 1.00            | 1.00            | 1.00            | 1.00            | 1.00            |
| 28 | Not vaccinated                                                     | 1.108           | 1.070           | 1.164           | 1.195           | 1.072           | 1.109           |
| 29 |                                                                    | (1.038 - 1.183) | (1.042 - 1.100) | (1.120 - 1.209) | (1.113 - 1.284) | (1.020 - 1.127) | (1.051 - 1.170) |
| 30 | <b>Observations</b>                                                | 176,583         | 119,018         | 122,680         | 120,246         | 135,121         | 31,520          |

Viewed another way, the social and biological mechanisms can be disentangled by stratifying regressions by socio-economic status. For the high SES group we select children who have mothers who have at least completed primary school, in households that are in one of the top two wealth quintiles and who live in an urban area (Table 4). We contrast this group of children with mothers who have not completed primary school, are in households that are in the bottom two wealth quintiles and live in a rural area. At the top of **Table 4** we report the absolute prevalence of the child health outcome by this stratification. In the high SES group 2.99% of the infants die, while in the low SES households 10.4% of the infants die (Table 4). Stunting, underweight, wasting diarrhoea and anaemia are all much more prevalent in low SES households than in the high SES households (Table 4). However, when considering the relative risk ratios across the age groups for outcomes of stunting, underweight and diarrhoea, the relative risk of a poor health outcome for young mothers is higher in the high SES households than in the low SES households (Table 4). The difference in the relative risk of age on these child health outcomes across the two groups indicates that early childbearing is not just a problem in lower socioeconomic groups.

Table 4: Adjusted Relative Risk Ratios in High SES and Low SES Households

|                                              | Infant Mortality |                 | Stunting        |                 | Underweight     |                 | Wasting         |                 | Diarrhoea       |                 | Moderate Anaemia |                 |
|----------------------------------------------|------------------|-----------------|-----------------|-----------------|-----------------|-----------------|-----------------|-----------------|-----------------|-----------------|------------------|-----------------|
|                                              | High SES         | Low SES         | High SES        | Low SES         | High SES        | Low SES         | High SES        | Low SES         | High SES        | Low SES         | High SES         | Low SES         |
| <b>Prevalence (Weighted %)</b>               | <b>2.99</b>      | <b>10.4</b>     | <b>18.6</b>     | <b>54.2</b>     | <b>7.92</b>     | <b>33.6</b>     | <b>4.46</b>     | <b>11.7</b>     | <b>11</b>       | <b>15.4</b>     | <b>21.4</b>      | <b>42.2</b>     |
| <b>Age Band of the Mother at First Birth</b> |                  |                 |                 |                 |                 |                 |                 |                 |                 |                 |                  |                 |
| <b>27-29 (Reference)</b>                     | 1.00             | 1.00            | 1.00            | 1.00            | 1.00            | 1.00            | 1.00            | 1.00            | 1.00            | 1.00            | 1.00             | 1.00            |
| 12-14                                        | 1.757            | 1.747           | 1.899           | 1.244           | 1.750           | 1.167           | 0.875           | 1.062           | 1.792           | 1.342           | 0.388            | 1.438           |
|                                              | (1.015 - 3.040)  | (1.338 - 2.283) | (1.473 - 2.449) | (1.118 - 1.385) | (1.169 - 2.619) | (1.004 - 1.355) | (0.358 - 2.140) | (0.776 - 1.452) | (1.229 - 2.612) | (1.057 - 1.702) | (0.108 - 1.400)  | (1.047 - 1.974) |
| 15-17                                        | 1.297            | 1.315           | 1.474           | 1.143           | 1.377           | 1.066           | 1.234           | 0.968           | 1.377           | 1.181           | 1.234            | 1.504           |
|                                              | (0.984 - 1.710)  | (1.029 - 1.681) | (1.313 - 1.655) | (1.040 - 1.257) | (1.147 - 1.654) | (0.935 - 1.215) | (0.950 - 1.602) | (0.744 - 1.258) | (1.172 - 1.618) | (0.964 - 1.446) | (1.001 - 1.521)  | (1.144 - 1.978) |
| 18-20                                        | 1.087            | 1.104           | 1.308           | 1.085           | 1.260           | 0.984           | 1.181           | 0.964           | 1.395           | 1.107           | 1.154            | 1.433           |
|                                              | (0.846 - 1.398)  | (0.865 - 1.409) | (1.179 - 1.452) | (0.987 - 1.192) | (1.071 - 1.482) | (0.863 - 1.121) | (0.951 - 1.467) | (0.743 - 1.250) | (1.214 - 1.603) | (0.905 - 1.354) | (0.964 - 1.381)  | (1.092 - 1.880) |
| 21-23                                        | 1.020            | 1.016           | 1.221           | 1.065           | 1.156           | 0.948           | 1.198           | 0.990           | 1.318           | 1.126           | 1.203            | 1.500           |
|                                              | (0.800 - 1.300)  | (0.790 - 1.307) | (1.102 - 1.352) | (0.968 - 1.171) | (0.985 - 1.357) | (0.830 - 1.084) | (0.976 - 1.472) | (0.759 - 1.292) | (1.152 - 1.508) | (0.917 - 1.382) | (1.008 - 1.437)  | (1.141 - 1.972) |
| 24-26                                        | 1.015            | 1.116           | 1.083           | 0.989           | 1.028           | 0.941           | 1.207           | 1.076           | 1.206           | 1.139           | 1.105            | 1.424           |
|                                              | (0.783 - 1.315)  | (0.848 - 1.470) | (0.972 - 1.208) | (0.890 - 1.100) | (0.871 - 1.215) | (0.811 - 1.091) | (0.979 - 1.489) | (0.811 - 1.428) | (1.048 - 1.388) | (0.911 - 1.425) | (0.925 - 1.320)  | (1.066 - 1.901) |
| 30-32                                        | 1.647            | 0.710           | 0.918           | 0.911           | 0.875           | 0.827           | 0.971           | 0.832           | 0.940           | 1.111           | 1.151            | 1.270           |
|                                              | (1.183 - 2.291)  | (0.414 - 1.216) | (0.771 - 1.093) | (0.760 - 1.093) | (0.666 - 1.150) | (0.624 - 1.097) | (0.697 - 1.351) | (0.488 - 1.418) | (0.757 - 1.167) | (0.777 - 1.590) | (0.886 - 1.496)  | (0.820 - 1.966) |
| 33-35                                        | 1.407            | 0.956           | 1.049           | 1.222           | 0.743           | 0.860           | 1.128           | 0.650           | 0.769           | 0.821           | 1.036            | 1.438           |
|                                              | (0.846 - 2.341)  | (0.525 - 1.740) | (0.822 - 1.338) | (1.013 - 1.473) | (0.471 - 1.170) | (0.594 - 1.245) | (0.713 - 1.785) | (0.287 - 1.473) | (0.555 - 1.065) | (0.488 - 1.379) | (0.686 - 1.565)  | (0.826 - 2.502) |
| <b>Sex of Child</b>                          |                  |                 |                 |                 |                 |                 |                 |                 |                 |                 |                  |                 |
| <b>Male (Reference)</b>                      | 1.00             | 1.00            | 1.00            | 1.00            | 1.00            | 1.00            | 1.00            | 1.00            | 1.00            | 1.00            | 1.00             | 1.00            |
| Female                                       | 0.700            | 0.829           | 0.850           | 0.929           | 0.911           | 0.921           | 0.886           | 0.843           | 0.913           | 0.959           | 0.942            | 0.963           |
|                                              | (0.627 - 0.782)  | (0.781 - 0.881) | (0.814 - 0.888) | (0.908 - 0.951) | (0.850 - 0.977) | (0.890 - 0.954) | (0.802 - 0.979) | (0.786 - 0.905) | (0.859 - 0.969) | (0.910 - 1.011) | (0.868 - 1.021)  | (0.910 - 1.019) |
| <b>Type of Birth</b>                         |                  |                 |                 |                 |                 |                 |                 |                 |                 |                 |                  |                 |
| <b>Singleton (Reference)</b>                 | 1.00             | 1.00            | 1.00            | 1.00            | 1.00            | 1.00            | 1.00            | 1.00            | 1.00            | 1.00            | 1.00             | 1.00            |
| Twin                                         | 5.439            | 4.557           | 1.212           | 1.271           | 1.704           | 1.448           | 1.365           | 1.392           | 0.768           | 1.015           | 1.061            | 1.183           |
|                                              | (4.278 - 6.916)  | (3.932 - 5.281) | (0.991 - 1.482) | (1.111 - 1.454) | (1.290 - 2.251) | (1.179 - 1.778) | (0.898 - 2.074) | (0.917 - 2.112) | (0.533 - 1.106) | (0.716 - 1.437) | (0.733 - 1.534)  | (0.860 - 1.627) |
| <b>Age of Child in Months</b>                |                  |                 |                 |                 |                 |                 |                 |                 |                 |                 |                  |                 |
| <b>48-59 months (Reference)</b>              |                  |                 | 1.00            | 1.00            | 1.00            | 1.00            | 1.00            | 1.00            | 1.00            | 1.00            | 1.00             | 1.00            |
| 36-47 months                                 |                  |                 | 1.239           | 1.118           | 1.037           | 1.037           | 0.877           | 0.994           | 1.410           | 1.453           | 1.258            | 1.219           |
|                                              |                  |                 | (1.145 - 1.341) | (1.076 - 1.162) | (0.919 - 1.170) | (0.976 - 1.102) | (0.741 - 1.039) | (0.868 - 1.138) | (1.229 - 1.617) | (1.289 - 1.638) | (1.064 - 1.487)  | (1.095 - 1.357) |
| 24-35 months                                 |                  |                 | 1.415           | 1.172           | 1.182           | 1.142           | 0.956           | 1.236           | 2.466           | 2.507           | 1.763            | 1.469           |
|                                              |                  |                 | (1.310 - 1.528) | (1.129 - 1.216) | (1.049 - 1.331) | (1.077 - 1.211) | (0.806 - 1.133) | (1.086 - 1.408) | (2.174 - 2.796) | (2.246 - 2.799) | (1.493 - 2.081)  | (1.319 - 1.637) |

|    |                                                                                  |          |          |          |          |          |          |          |          |          |          |          |          |
|----|----------------------------------------------------------------------------------|----------|----------|----------|----------|----------|----------|----------|----------|----------|----------|----------|----------|
| 1  | 12-23 months                                                                     |          |          | 1.392    | 1.081    | 1.107    | 1.151    | 1.156    | 1.853    | 3.891    | 3.720    | 2.585    | 1.927    |
| 2  |                                                                                  |          |          | (1.287 - | (1.040 - | (0.977 - | (1.084 - | (0.974 - | (1.632 - | (3.449 - | (3.347 - | (2.163 - | (1.727 - |
| 3  |                                                                                  |          |          | 1.506)   | 1.124)   | 1.254)   | 1.222)   | 1.371)   | 2.104)   | 4.389)   | 4.135)   | 3.090)   | 2.149)   |
| 4  | <b>Education Level of the Mother at Time of Interview</b>                        |          |          |          |          |          |          |          |          |          |          |          |          |
| 5  | Secondary or Higher (Reference)                                                  | 1.00     |          | 1.00     |          | 1.00     |          |          |          | 1.00     |          | 1.00     |          |
| 6  | Completed Primary                                                                | 1.220    |          | 1.266    |          | 1.208    |          | 1.103    |          | 1.177    |          | 1.099    |          |
| 7  |                                                                                  | (1.049 - |          | (1.191 - |          | (1.101 - |          | (0.969 - |          | (1.085 - |          | (0.987 - |          |
| 8  |                                                                                  | 1.420)   |          | 1.346)   |          | 1.325)   |          | 1.255)   |          | 1.277)   |          | 1.223)   |          |
| 9  | <b>Mother has a Partner</b>                                                      |          |          |          |          |          |          |          |          |          |          |          |          |
| 10 | Yes (Reference)                                                                  | 1.00     | 1.00     | 1.00     | 1.00     | 1.00     | 1.00     | 1.00     | 1.00     | 1.00     | 1.00     | 1.00     | 1.00     |
| 11 | No                                                                               | 1.012    | 0.960    | 1.215    | 1.038    | 1.333    | 1.180    | 1.249    | 1.608    | 1.038    | 1.223    | 1.100    | 1.063    |
| 12 |                                                                                  | (0.811 - | (0.739 - | (1.108 - | (0.949 - | (1.127 - | (1.012 - | (0.985 - | (1.179 - | (0.926 - | (1.030 - | (0.930 - | (0.814 - |
| 13 |                                                                                  | 1.263)   | 1.246)   | 1.332)   | 1.135)   | 1.577)   | 1.377)   | 1.583)   | 2.193)   | 1.163)   | 1.451)   | 1.301)   | 1.388)   |
| 14 | <b>Education Level of the Mother's Partner at the Time of Interview</b>          |          |          |          |          |          |          |          |          |          |          |          |          |
| 15 | Higher (Reference)                                                               | 1.00     | 1.00     | 1.00     | 1.00     | 1.00     | 1.00     | 1.00     | 1.00     | 1.00     | 1.00     | 1.00     | 1.00     |
| 16 | Completed primary                                                                | 1.046    | 1.100    | 1.115    | 0.997    | 1.137    | 1.056    | 0.910    | 1.266    | 1.071    | 0.989    | 1.087    | 0.987    |
| 17 |                                                                                  | (0.911 - | (0.902 - | (1.052 - | (0.926 - | (1.041 - | (0.940 - | (0.807 - | (0.994 - | (0.989 - | (0.852 - | (0.979 - | (0.782 - |
| 18 |                                                                                  | 1.201)   | 1.341)   | 1.182)   | 1.074)   | 1.242)   | 1.187)   | 1.027)   | 1.613)   | 1.159)   | 1.148)   | 1.208)   | 1.246)   |
| 19 | No education or incomplete primary                                               | 1.303    | 1.277    | 1.206    | 1.039    | 1.381    | 1.224    | 1.180    | 1.452    | 1.209    | 1.002    | 1.221    | 0.974    |
| 20 |                                                                                  | (1.059 - | (1.059 - | (1.109 - | (0.968 - | (1.218 - | (1.094 - | (0.981 - | (1.149 - | (1.069 - | (0.869 - | (1.043 - | (0.777 - |
| 21 |                                                                                  | 1.602)   | 1.540)   | 1.312)   | 1.116)   | 1.566)   | 1.370)   | 1.420)   | 1.834)   | 1.368)   | 1.156)   | 1.428)   | 1.222)   |
| 22 | <b>Age Band of the Mother's Partner at the Birth of the Mother's First Birth</b> |          |          |          |          |          |          |          |          |          |          |          |          |
| 23 | 24-29 (Reference)                                                                | 1.00     | 1.00     | 1.00     | 1.00     | 1.00     | 1.00     | 1.00     | 1.00     | 1.00     | 1.00     | 1.00     | 1.00     |
| 24 | 12-17                                                                            | 1.284    | 1.528    | 1.010    | 1.087    | 1.106    | 1.085    | 0.551    | 0.959    | 1.206    | 1.091    | 1.124    | 1.005    |
| 25 |                                                                                  | (0.668 - | (1.261 - | (0.697 - | (0.996 - | (0.627 - | (0.937 - | (0.141 - | (0.672 - | (0.847 - | (0.883 - | (0.664 - | (0.785 - |
| 26 |                                                                                  | 2.470)   | 1.851)   | 1.466)   | 1.186)   | 1.952)   | 1.256)   | 2.147)   | 1.368)   | 1.715)   | 1.349)   | 1.901)   | 1.285)   |
| 27 | 18-23                                                                            | 1.122    | 1.090    | 1.141    | 1.036    | 1.072    | 1.015    | 1.028    | 0.977    | 0.967    | 1.076    | 1.069    | 1.061    |
| 28 |                                                                                  | (0.948 - | (1.008 - | (1.070 - | (1.006 - | (0.970 - | (0.970 - | (0.872 - | (0.889 - | (0.881 - | (1.006 - | (0.954 - | (0.989 - |
| 29 |                                                                                  | 1.327)   | 1.178)   | 1.217)   | 1.068)   | 1.186)   | 1.063)   | 1.211)   | 1.073)   | 1.061)   | 1.149)   | 1.198)   | 1.138)   |
| 30 | 30-35                                                                            | 0.907    | 0.970    | 0.937    | 0.964    | 0.917    | 0.960    | 1.012    | 0.878    | 0.911    | 0.990    | 0.892    | 1.122    |
| 31 |                                                                                  | (0.770 - | (0.863 - | (0.875 - | (0.919 - | (0.825 - | (0.898 - | (0.880 - | (0.767 - | (0.831 - | (0.895 - | (0.795 - | (1.027 - |
| 32 |                                                                                  | 1.069)   | 1.090)   | 1.004)   | 1.012)   | 1.019)   | 1.026)   | 1.163)   | 1.004)   | 1.000)   | 1.094)   | 1.000)   | 1.226)   |
| 33 | 36-41                                                                            | 0.784    | 0.950    | 0.962    | 1.030    | 0.760    | 0.970    | 1.070    | 0.851    | 0.994    | 0.993    | 0.876    | 1.180    |
| 34 |                                                                                  | (0.587 - | (0.797 - | (0.852 - | (0.963 - | (0.614 - | (0.880 - | (0.842 - | (0.701 - | (0.851 - | (0.855 - | (0.715 - | (1.044 - |
| 35 |                                                                                  | 1.048)   | 1.132)   | 1.086)   | 1.101)   | 0.940)   | 1.069)   | 1.360)   | 1.034)   | 1.160)   | 1.152)   | 1.074)   | 1.334)   |
| 36 | 42-59                                                                            | 0.698    | 1.100    | 1.106    | 1.054    | 1.119    | 0.960    | 1.388    | 0.885    | 0.949    | 1.078    | 0.910    | 1.012    |
| 37 |                                                                                  | (0.413 - | (0.912 - | (0.907 - | (0.973 - | (0.807 - | (0.854 - | (0.940 - | (0.711 - | (0.731 - | (0.909 - | (0.656 - | (0.869 - |
| 38 |                                                                                  | 1.178)   | 1.327)   | 1.349)   | 1.141)   | 1.550)   | 1.079)   | 2.052)   | 1.103)   | 1.233)   | 1.280)   | 1.263)   | 1.178)   |
| 39 | <b>Wealth Quintile of the Child's Household</b>                                  |          |          |          |          |          |          |          |          |          |          |          |          |
| 40 | Richest (Reference)                                                              | 1.00     |          | 1.00     |          | 1.00     |          | 1.00     |          | 1.00     |          | 1.00     |          |
| 41 | Rich                                                                             | 1.267    |          | 1.223    |          | 1.288    |          | 1.045    |          | 1.143    |          | 1.121    |          |
| 42 |                                                                                  | (1.111 - |          | (1.161 - |          | (1.187 - |          | (0.926 - |          | (1.065 - |          | (1.023 - |          |
| 43 |                                                                                  | 1.445)   |          | 1.290)   |          | 1.398)   |          | 1.180)   |          | 1.226)   |          | 1.228)   |          |
| 44 | Poorer                                                                           |          | 0.996    |          | 0.936    |          | 0.923    |          | 0.937    |          | 0.957    |          | 0.977    |
| 45 |                                                                                  |          | (0.938 - |          | (0.913 - |          | (0.891 - |          | (0.870 - |          | (0.905 - |          | (0.922 - |
| 46 |                                                                                  |          | 1.057)   |          | 0.959)   |          | 0.956)   |          | 1.008)   |          | 1.012)   |          | 1.037)   |

|    |                                          |          |          |          |          |          |          |          |          |          |          |          |
|----|------------------------------------------|----------|----------|----------|----------|----------|----------|----------|----------|----------|----------|----------|
| 1  | <b>Water Piped to the Child's House</b>  |          |          |          |          |          |          |          |          |          |          |          |
| 2  | <b>Piped to house (Reference)</b>        | 1.00     | 1.00     | 1.00     | 1.00     | 1.00     | 1.00     | 1.00     | 1.00     | 1.00     | 1.00     | 1.00     |
| 3  | Water not piped to house                 | 1.066    | 1.138    | 0.936    | 0.964    | 1.001    | 1.066    | 0.991    | 1.163    | 0.966    | 1.065    | 0.976    |
| 4  |                                          | (0.924 - | (1.017 - | (0.883 - | (0.925 - | (0.919 - | (0.995 - | (0.874 - | (1.015 - | (0.884 - | (0.979 - | (0.886 - |
| 5  |                                          | 1.229)   | 1.273)   | 0.993)   | 1.004)   | 1.089)   | 1.142)   | 1.123)   | 1.333)   | 1.055)   | 1.159)   | 1.076)   |
| 6  | <b>Flush Toilet at Child's House</b>     |          |          |          |          |          |          |          |          |          |          |          |
| 7  | <b>Flush toilet at house (Reference)</b> | 1.00     | 1.00     | 1.00     | 1.00     | 1.00     | 1.00     | 1.00     | 1.00     | 1.00     | 1.00     | 1.00     |
| 8  | No flush toilet at house                 | 0.948    | 1.369    | 1.158    | 1.173    | 1.082    | 1.239    | 1.011    | 0.996    | 1.088    | 1.057    | 0.984    |
| 9  |                                          | (0.818 - | (1.075 - | (1.089 - | (1.064 - | (0.988 - | (1.037 - | (0.879 - | (0.753 - | (0.994 - | (0.889 - | (0.872 - |
| 10 |                                          | 1.098)   | 1.745)   | 1.232)   | 1.294)   | 1.185)   | 1.481)   | 1.164)   | 1.318)   | 1.191)   | 1.257)   | 1.110)   |
| 11 | <b>Child Measles Vaccination</b>         |          |          |          |          |          |          |          |          |          |          |          |
| 12 | <b>Vaccinated (Reference)</b>            | 1.00     | 1.00     | 1.00     | 1.00     | 1.00     | 1.00     | 1.00     | 1.00     | 1.00     | 1.00     | 1.00     |
| 13 | Not vaccinated                           | 1.653    | 1.000    | 1.190    | 1.066    | 1.211    | 1.200    | 1.229    | 1.185    | 1.045    | 1.030    | 1.299    |
| 14 |                                          | (1.309 - | (0.905 - | (1.072 - | (1.022 - | (1.037 - | (1.130 - | (0.969 - | (1.050 - | (0.907 - | (0.940 - | (1.101 - |
| 15 |                                          | 2.088)   | 1.106)   | 1.320)   | 1.111)   | 1.414)   | 1.275)   | 1.559)   | 1.337)   | 1.204)   | 1.129)   | 1.531)   |
| 16 | <b>Observations</b>                      | 40,299   | 38,612   | 28,797   | 23,657   | 29,345   | 24,846   | 28,783   | 24,251   | 32,809   | 27,435   | 8,027    |
| 17 |                                          |          |          |          |          |          |          |          |          |          |          |          |

18 Note: High SES includes children who are in households that are in the rich or richest wealth quintiles, have mothers with completed primary school or higher,  
 19 and live in an urban area. Low SES includes children who are in households that are in the poor and poorest wealth quintiles, have mothers with incomplete  
 20 primary or no education, and live in a rural area.  
 21  
 22  
 23  
 24  
 25  
 26  
 27  
 28  
 29  
 30  
 31  
 32  
 33  
 34  
 35  
 36  
 37  
 38  
 39  
 40  
 41  
 42  
 43  
 44  
 45

**Results: Sensitivity Analysis**

1  
2  
3 Recent work by Subramanian et al<sup>2</sup> and Ozaltin et al<sup>31</sup> indicates that maternal height is a significant predictor of  
4 infant mortality, anthropometric failure and anaemia. At the cost of a smaller sample (n=101,054) height is included as a  
5 control variable in the regression to examine whether in the sub-set of countries for which the Demographic and Health  
6 Surveys have data on women's height, the age effect that we observe confounded by maternal height. Household  
7 religion is also included as a control variable. Even after controlling for height and religion, the age of the mother is a  
8 significant risk factor for infant mortality, anthropometric failure and child health outcomes (Table 5). Controlling for  
9 height, which is an additional biological indicator, and religion, which is an additional social indicator, the general  
10 relationship between the age of mother at first birth and child health outcomes does not change (Table 5).  
11  
12  
13  
14  
15  
16  
17  
18  
19  
20  
21  
22  
23  
24  
25  
26  
27  
28  
29  
30  
31  
32  
33  
34  
35  
36  
37  
38  
39  
40  
41  
42  
43  
44  
45  
46  
47  
48  
49  
50  
51  
52  
53  
54  
55  
56  
57  
58  
59  
60

Table 5: Sensitivity Analysis: Adjusted Relative Risk Ratios including Height and Religion as Covariates

|                                                                                  | Infant Mortality         | Stunting                 | Underweight              | Wasting                  | Diarrhoea                | Moderate Anaemia         |
|----------------------------------------------------------------------------------|--------------------------|--------------------------|--------------------------|--------------------------|--------------------------|--------------------------|
| <b>Age Band of the Mother at First Birth</b>                                     |                          |                          |                          |                          |                          |                          |
| <b>27-29 (Reference)</b>                                                         | 1.00                     | 1.00                     | 1.00                     | 1.00                     | 1.00                     | 1.00                     |
| 12-14                                                                            | 1.654<br>(1.379 - 1.983) | 1.356<br>(1.259 - 1.460) | 1.293<br>(1.167 - 1.434) | 1.005<br>(0.832 - 1.212) | 1.270<br>(1.091 - 1.480) | 1.217<br>(1.031 - 1.436) |
| 15-17                                                                            | 1.283<br>(1.096 - 1.502) | 1.276<br>(1.198 - 1.358) | 1.187<br>(1.087 - 1.296) | 1.014<br>(0.881 - 1.166) | 1.227<br>(1.102 - 1.367) | 1.316<br>(1.169 - 1.482) |
| 18-20                                                                            | 1.064<br>(0.911 - 1.243) | 1.216<br>(1.144 - 1.293) | 1.110<br>(1.018 - 1.210) | 0.995<br>(0.869 - 1.139) | 1.202<br>(1.083 - 1.335) | 1.306<br>(1.165 - 1.463) |
| 21-23                                                                            | 1.015<br>(0.867 - 1.187) | 1.154<br>(1.085 - 1.228) | 1.058<br>(0.970 - 1.154) | 1.018<br>(0.890 - 1.165) | 1.189<br>(1.070 - 1.321) | 1.343<br>(1.198 - 1.505) |
| 24-26                                                                            | 1.101<br>(0.930 - 1.303) | 1.044<br>(0.976 - 1.117) | 1.016<br>(0.925 - 1.116) | 1.042<br>(0.903 - 1.203) | 1.058<br>(0.945 - 1.185) | 1.226<br>(1.087 - 1.383) |
| 30-32                                                                            | 1.252<br>(0.973 - 1.611) | 0.925<br>(0.829 - 1.033) | 0.810<br>(0.688 - 0.952) | 0.918<br>(0.723 - 1.166) | 0.878<br>(0.726 - 1.062) | 1.118<br>(0.927 - 1.349) |
| 33-35                                                                            | 1.482<br>(1.070 - 2.052) | 1.006<br>(0.861 - 1.175) | 0.875<br>(0.689 - 1.110) | 1.064<br>(0.757 - 1.497) | 0.804<br>(0.607 - 1.064) | 1.095<br>(0.838 - 1.430) |
| <b>Sex of Child</b>                                                              |                          |                          |                          |                          |                          |                          |
| <b>Male (Reference)</b>                                                          | 1.00                     | 1.00                     | 1.00                     | 1.00                     | 1.00                     | 1.00                     |
| Female                                                                           | 0.803<br>(0.768 - 0.839) | 0.907<br>(0.893 - 0.922) | 0.919<br>(0.897 - 0.942) | 0.865<br>(0.828 - 0.905) | 0.926<br>(0.896 - 0.957) | 0.965<br>(0.933 - 0.997) |
| <b>Type of Birth</b>                                                             |                          |                          |                          |                          |                          |                          |
| <b>Singleton (Reference)</b>                                                     | 1.00                     | 1.00                     | 1.00                     | 1.00                     | 1.00                     | 1.00                     |
| Twin                                                                             | 4.794<br>(4.325 - 5.315) | 1.311<br>(1.201 - 1.430) | 1.561<br>(1.378 - 1.768) | 1.205<br>(0.934 - 1.554) | 0.943<br>(0.771 - 1.153) | 1.023<br>(0.841 - 1.244) |
| <b>Age of Child in Months</b>                                                    |                          |                          |                          |                          |                          |                          |
| <b>48-59 months (Reference)</b>                                                  |                          | 1.00                     | 1.00                     | 1.00                     | 1.00                     | 1.00                     |
| 36-47 months                                                                     |                          | 1.154<br>(1.122 - 1.187) | 1.021<br>(0.981 - 1.064) | 0.972<br>(0.896 - 1.055) | 1.466<br>(1.351 - 1.590) | 1.240<br>(1.160 - 1.326) |
| 24-35 months                                                                     |                          | 1.253<br>(1.219 - 1.288) | 1.135<br>(1.090 - 1.181) | 1.167<br>(1.078 - 1.263) | 2.651<br>(2.460 - 2.857) | 1.603<br>(1.496 - 1.718) |
| 12-23 months                                                                     |                          | 1.168<br>(1.134 - 1.202) | 1.133<br>(1.087 - 1.182) | 1.633<br>(1.508 - 1.768) | 4.261<br>(3.962 - 4.581) | 2.109<br>(1.963 - 2.265) |
| <b>Education Level of the Mother at Time of Interview</b>                        |                          |                          |                          |                          |                          |                          |
| <b>Secondary or Higher (Reference)</b>                                           | 1.00                     | 1.00                     | 1.00                     | 1.00                     | 1.00                     | 1.00                     |
| Completed Primary                                                                | 1.268<br>(1.132 - 1.420) | 1.173<br>(1.126 - 1.221) | 1.186<br>(1.115 - 1.261) | 0.990<br>(0.905 - 1.083) | 1.143<br>(1.068 - 1.224) | 1.106<br>(1.022 - 1.197) |
| No education or incomplete primary                                               | 1.605<br>(1.423 - 1.810) | 1.287<br>(1.232 - 1.344) | 1.389<br>(1.301 - 1.484) | 1.155<br>(1.047 - 1.273) | 1.201<br>(1.115 - 1.295) | 1.180<br>(1.082 - 1.287) |
| <b>Mother has a Partner</b>                                                      |                          |                          |                          |                          |                          |                          |
| <b>Yes (Reference)</b>                                                           | 1.00                     | 1.00                     | 1.00                     | 1.00                     | 1.00                     | 1.00                     |
| No                                                                               | 0.952<br>(0.835 - 1.084) | 1.115<br>(1.065 - 1.168) | 1.214<br>(1.125 - 1.310) | 1.277<br>(1.123 - 1.451) | 1.127<br>(1.040 - 1.222) | 1.122<br>(1.017 - 1.239) |
| <b>Education Level of the Mother's Partner at the Time of Interview</b>          |                          |                          |                          |                          |                          |                          |
| <b>Higher (Reference)</b>                                                        | 1.00                     | 1.00                     | 1.00                     | 1.00                     | 1.00                     | 1.00                     |
| Completed primary                                                                | 1.109<br>(1.019 - 1.208) | 1.069<br>(1.035 - 1.105) | 1.122<br>(1.069 - 1.178) | 1.069<br>(0.989 - 1.157) | 1.022<br>(0.964 - 1.083) | 1.091<br>(1.020 - 1.166) |
| No education or incomplete primary                                               | 1.229<br>(1.122 - 1.345) | 1.136<br>(1.098 - 1.175) | 1.238<br>(1.176 - 1.304) | 1.169<br>(1.073 - 1.273) | 1.051<br>(0.986 - 1.119) | 1.121<br>(1.041 - 1.207) |
| <b>Age Band of the Mother's Partner at the Birth of the Mother's First Birth</b> |                          |                          |                          |                          |                          |                          |
| <b>24-29 (Reference)</b>                                                         | 1.00                     | 1.00                     | 1.00                     | 1.00                     | 1.00                     | 1.00                     |
| 12-17                                                                            | 1.388<br>(1.182 - 1.631) | 1.071<br>(1.000 - 1.148) | 1.138<br>(1.024 - 1.266) | 0.987<br>(0.764 - 1.274) | 1.161<br>(0.986 - 1.366) | 1.104<br>(0.932 - 1.307) |



|    |                                                                    |                          |                          |                          |                          |                          |                          |
|----|--------------------------------------------------------------------|--------------------------|--------------------------|--------------------------|--------------------------|--------------------------|--------------------------|
| 1  | 18-23                                                              | 1.067<br>(1.007 - 1.129) | 1.043<br>(1.023 - 1.065) | 1.036<br>(1.006 - 1.067) | 1.016<br>(0.959 - 1.076) | 1.060<br>(1.014 - 1.107) | 1.061<br>(1.017 - 1.108) |
| 2  | 30-35                                                              | 0.923<br>(0.857 - 0.994) | 0.952<br>(0.925 - 0.979) | 0.943<br>(0.907 - 0.980) | 0.929<br>(0.868 - 0.995) | 0.965<br>(0.913 - 1.020) | 0.984<br>(0.934 - 1.037) |
| 3  | 36-41                                                              | 1.007<br>(0.903 - 1.122) | 0.973<br>(0.930 - 1.018) | 0.925<br>(0.867 - 0.988) | 0.912<br>(0.814 - 1.021) | 1.045<br>(0.958 - 1.140) | 1.091<br>(1.010 - 1.179) |
| 4  | 42-59                                                              | 1.034<br>(0.906 - 1.180) | 1.037<br>(0.980 - 1.097) | 1.022<br>(0.945 - 1.107) | 0.927<br>(0.805 - 1.069) | 1.112<br>(0.998 - 1.239) | 0.966<br>(0.875 - 1.067) |
| 5  | <b>Wealth Quintile of the Child's Household</b>                    |                          |                          |                          |                          |                          |                          |
| 6  | <b>Richest (Reference)</b>                                         | 1.00                     | 1.00                     | 1.00                     | 1.00                     | 1.00                     | 1.00                     |
| 7  | Rich                                                               | 1.167<br>(1.072 - 1.269) | 1.203<br>(1.164 - 1.244) | 1.294<br>(1.230 - 1.361) | 1.132<br>(1.042 - 1.229) | 1.157<br>(1.091 - 1.226) | 1.134<br>(1.067 - 1.204) |
| 8  | Middle                                                             | 1.258<br>(1.148 - 1.378) | 1.263<br>(1.218 - 1.310) | 1.420<br>(1.345 - 1.500) | 1.274<br>(1.162 - 1.397) | 1.152<br>(1.078 - 1.230) | 1.196<br>(1.118 - 1.280) |
| 9  | Poorer                                                             | 1.273<br>(1.156 - 1.403) | 1.297<br>(1.249 - 1.348) | 1.487<br>(1.403 - 1.575) | 1.348<br>(1.222 - 1.487) | 1.174<br>(1.094 - 1.259) | 1.224<br>(1.137 - 1.318) |
| 10 | Poorest                                                            | 1.299<br>(1.174 - 1.437) | 1.334<br>(1.282 - 1.388) | 1.585<br>(1.493 - 1.682) | 1.444<br>(1.303 - 1.601) | 1.207<br>(1.120 - 1.301) | 1.299<br>(1.202 - 1.403) |
| 11 | <b>Residence of the Child's Household at the Time of Interview</b> |                          |                          |                          |                          |                          |                          |
| 12 | <b>Urban (Reference)</b>                                           | 1.00                     | 1.00                     | 1.00                     | 1.00                     | 1.00                     | 1.00                     |
| 13 | Rural                                                              | 1.050<br>(0.983 - 1.121) | 1.066<br>(1.040 - 1.094) | 1.037<br>(1.000 - 1.076) | 0.949<br>(0.891 - 1.012) | 0.963<br>(0.917 - 1.011) | 0.987<br>(0.939 - 1.037) |
| 14 | <b>Water Piped to the Child's House</b>                            |                          |                          |                          |                          |                          |                          |
| 15 | <b>Piped to house (Reference)</b>                                  | 1.00                     | 1.00                     | 1.00                     | 1.00                     | 1.00                     | 1.00                     |
| 16 | Water not piped to house                                           | 1.105<br>(1.036 - 1.180) | 0.983<br>(0.960 - 1.007) | 1.043<br>(1.006 - 1.082) | 1.023<br>(0.961 - 1.089) | 0.984<br>(0.940 - 1.030) | 0.993<br>(0.949 - 1.039) |
| 17 | <b>Flush Toilet at Child's House</b>                               |                          |                          |                          |                          |                          |                          |
| 18 | <b>Flush toilet at house (Reference)</b>                           | 1.00                     | 1.00                     | 1.00                     | 1.00                     | 1.00                     | 1.00                     |
| 19 | No flush toilet at house                                           | 1.106<br>(1.012 - 1.210) | 1.177<br>(1.138 - 1.217) | 1.123<br>(1.071 - 1.176) | 1.090<br>(1.010 - 1.178) | 1.037<br>(0.976 - 1.102) | 1.056<br>(0.996 - 1.119) |
| 20 | <b>Child Measles Vaccination</b>                                   |                          |                          |                          |                          |                          |                          |
| 21 | <b>Vaccinated (Reference)</b>                                      | 1.00                     | 1.00                     | 1.00                     | 1.00                     | 1.00                     | 1.00                     |
| 22 | Not vaccinated                                                     | 1.076<br>(0.990 - 1.170) | 1.083<br>(1.050 - 1.118) | 1.152<br>(1.102 - 1.204) | 1.145<br>(1.053 - 1.245) | 1.167<br>(1.095 - 1.242) | 1.108<br>(1.047 - 1.173) |
| 23 | <b>Religion</b>                                                    |                          |                          |                          |                          |                          |                          |
| 24 | <b>Christian (Reference)</b>                                       | 1.00                     | 1.00                     | 1.00                     | 1.00                     | 1.00                     | 1.00                     |
| 25 | Muslim                                                             | 1.025<br>(0.951 - 1.104) | 1.042<br>(1.012 - 1.073) | 1.283<br>(1.227 - 1.341) | 1.385<br>(1.277 - 1.501) | 1.066<br>(1.004 - 1.131) | 1.060<br>(0.996 - 1.128) |
| 26 | Other                                                              | 1.096<br>(1.017 - 1.181) | 1.032<br>(1.003 - 1.061) | 1.242<br>(1.187 - 1.299) | 1.290<br>(1.186 - 1.402) | 0.988<br>(0.929 - 1.050) | 1.158<br>(1.090 - 1.230) |
| 27 | <b>Height of respondent (metres)</b>                               |                          |                          |                          |                          |                          |                          |
| 28 | <b>160-200cm (Reference)</b>                                       | 1.00                     | 1.00                     | 1.00                     | 1.00                     | 1.00                     | 1.00                     |
| 29 | 155-159cm                                                          | 1.128<br>(1.062 - 1.199) | 1.249<br>(1.216 - 1.282) | 1.267<br>(1.217 - 1.319) | 1.007<br>(0.942 - 1.076) | 1.002<br>(0.959 - 1.047) | 1.008<br>(0.963 - 1.055) |
| 30 | 150-154cm                                                          | 1.172<br>(1.097 - 1.252) | 1.456<br>(1.417 - 1.495) | 1.512<br>(1.452 - 1.574) | 1.096<br>(1.024 - 1.174) | 1.044<br>(0.996 - 1.094) | 0.994<br>(0.946 - 1.045) |
| 31 | 145-149cm                                                          | 1.289<br>(1.191 - 1.396) | 1.698<br>(1.648 - 1.749) | 1.807<br>(1.728 - 1.890) | 1.180<br>(1.090 - 1.278) | 1.023<br>(0.962 - 1.087) | 0.971<br>(0.914 - 1.031) |
| 32 | 100-144cm                                                          | 1.586<br>(1.433 - 1.754) | 2.013<br>(1.944 - 2.085) | 2.123<br>(2.015 - 2.236) | 1.248<br>(1.127 - 1.382) | 1.002<br>(0.915 - 1.098) | 1.100<br>(1.016 - 1.190) |
| 33 | <b>Observations</b>                                                | 101,054                  | 71,218                   | 73,793                   | 72,007                   | 78,226                   | 22,143                   |

## Discussion

### Principal Findings

In this paper we show that there is an improvement in child health outcomes as the age of mother at first birth rises up to ages 27, controlling for maternal, paternal and household and social factors. This is a much higher age than usually found in the literature, where teen pregnancy is emphasized as a risk factor. In the adjusted model, infant mortality shows an elevated risk for mother's below age 27, though the effect is only statistically significant for women below age 18. However, the lack of significance may be because infant mortality is relatively rare and when we turn to models for stunting, diarrhoea, and anaemia outcomes, we find all of these have elevated risk for all mothers below age 27, and this higher risk is statistically significant.

Our results indicate that children to mothers below age 27 are at higher risk of poor health outcomes. In our sample of low- to middle-income countries only 7% of women delay their first birth until the age of 27 or older. The United States has seen a steady rise in the average age at first birth from 21 in 1970 to 25 in 2000.<sup>34</sup> Age at first birth is increasing in some of our sample countries, but still lags behind the level seen in United States. For example, in the 1993 Bangladesh DHS the mean age for first births in the last five years was 18.2, but in 2007 had risen to 18.5. In Ghana age for first births increased from a mean of 19.8 in 1988 to 21.2 in 2008. In Tanzania mean age at first birth increased from 19.2 in 1991 to 19.6 in 2004. Bongaarts found that family planning programs can reduce the child mortality rate by delaying the age at first birth, preventing high parity births, and improving birth spacing.<sup>35</sup> The results in this paper indicate that there are benefits to reducing infant mortality and improving child health by delaying the age at first birth even for women in their early twenties.

### Comparisons to other studies

Consistent with country studies, in this paper we show that delaying first birth beyond the teen years and into the twenties has a positive impact on child survival. Unlike the Raj *et al.*<sup>13</sup> study that focused on the case of India, in the current study that applies 55 low- to middle-income countries we find that in general in the low- to middle-income countries young maternal age has a significant effect of reducing infant mortality, stunting, underweight, diarrhoea and moderate to strong anaemia. In the 2005-6 India sample, Raj *et al.*<sup>13</sup> find that maternal age only has a significant effect on stunting and underweight. The broadening of the significant results to include other child health outcomes can stem

1 from the inclusion of a greater number of countries, and also from a wider time horizon. As the 2005-6 India National  
2 Family Health Survey-3 is one of the 118 surveys within our current study, the comparison between our study and the  
3 Raj *et al*<sup>13</sup> study highlights that generalizing across countries is not mirrored in each country experience. Thus we  
4 include the country specific examples in the appendix (Table A2). Even so, for the case of India in our sample there are  
5 three National Family Health Surveys (1992, 1998, 2005-6) and not just the one. Thus, even the country specific results  
6 can differ from the survey specific results. Taking a broad view, however, the two papers yield the same fundamental  
7 conclusion and that is, delaying first birth beyond the teen years is beneficial for child health outcomes. Changing the  
8 date range and countries within the study creates subtle differences in the finer points of the results, but the  
9 fundamental result remains consistent.  
10  
11  
12  
13  
14  
15  
16  
17  
18  
19

### 20 21 **Limitations of the study**

22 Although this study provides important insights in the benefits to child health of delaying first birth to age 27-29, there  
23 are certain limitations that should be considered when interpreting the results. The primary variable of interest, age of  
24 mother, is subject to measurement error as collection of this variable relies on recall by the respondent. The same holds  
25 true for identifying the population of children within a 0-11 and 12-60 month age range. We already include the 60  
26 month old children (which would normally be restricted to 12-59 months) as it is common for the mother to round up in  
27 their recall of the child's age. The result is that a larger fraction of children are reported to be 60 months than 59  
28 months. As this inconsistency is attributed to recall error, we follow the World Health Organization guidelines and  
29 include the 60 month olds in the child group. For the women's age, we assume that measurement error increases with  
30 actual age. Given our concern over young mothers, then the measurement error on the age will be minimized for this  
31 group of interest.  
32  
33  
34  
35  
36  
37  
38  
39  
40  
41  
42  
43  
44  
45

46 A further limitation of the model is that the socio-economic measures of male and female education, along with  
47 the wealth index, may not fully capture the socio-economic status of the woman and her child. While we include  
48 information about location of residence, piped water to the house, and flush toilet, these all serve as proxies for actual  
49 SES. Any unobserved wealth captured in the residual will confound the current results. Factors such as actual household  
50 income and education quality are such variables that we are unable to control for in the regression and may significantly  
51 influence child health outcomes and shape our understanding of the role of SES factors.  
52  
53  
54  
55  
56  
57  
58  
59  
60

## Conclusions and implications

The current study documents that for the first born child who is born to a woman aged less than 27-29 in low- to middle-income countries, it is at a higher risk of infant mortality, stunting, underweight, diarrhoea, and moderate to strong anaemia, but at no significantly different risk of wasting. Children born to women aged 12-14 or 15-17 are significantly more likely to suffer mortality in their first year of life than children born to women aged 27-29. For children born to women aged 19-26, the risk of mortality declines as she ages each year, but this risk is not significantly different from the risk to children born to women aged 27-29. The risk of stunting, diarrhoea, and anaemia diminishes significantly as a woman delays her first birth through to age 27-29 when the risk is minimized. The risk of underweight decreases significantly as a woman delays her first birth and is minimized by age 21. These results offer support to the evidence of the benefits to offspring of delaying first birth. Importantly, the results in this study show that it is optimal to delay first birth until age 27-29, and not just avoiding teen pregnancy. The results reveal that interventions designed to target adolescents potentially omit an group of women in their early twenties who are also at risk of having children with poor health outcomes. Development of programs targeting women in general, and not just targeting teen mothers, should provide women and families with tools to make informed decisions over the timing of their first birth and the benefits of delaying the birth. Highlighting the benefits of delaying first birth to the child's health, provides a mechanism for young female family members have time to build their own education and skills to empower their autonomy and to better care for their children.

Our results indicated that while the absolute risk of poor child health outcomes is lower when the mother is in a high-SES household, there remains a high relative risk of poor child health outcomes for young mothers even in high-SES households. The persistence of the age gradient across the SES groups highlights that child and maternal health issues associated with age of the mother cut across SES lines and the children of young-rich women are not shielded from the relative risk of a poor health outcome.

Encouraging women to delay their first birth, and encouraging families to permit the delay when the woman is not granted autonomy over her reproductive health decisions, come through providing women with viable and valuable alternatives. Education programs to encourage women to stay in school, take on meaningful employment opportunities, and provide service to the community, relieves the immediacy of child bearing. It also provides empowerment to

1 women in illustrating to herself and her family that her contribution to society need not only be defined by her  
2 reproductive life. By delaying a few years and engaging in other activities she contributes to society as well as  
3 broadening her skills and knowledge to go on to be a more informed and more highly educated mother. These benefits  
4 to the women, then trickle through the generations and benefit her offspring. In this paper, we showed that those  
5 benefits are in terms of health, but future studies may highlight the educational and social benefits for a child if a  
6 woman delays her first birth.  
7  
8  
9  
10  
11  
12  
13  
14  
15  
16  
17  
18  
19  
20  
21  
22  
23  
24  
25  
26  
27  
28  
29  
30  
31  
32  
33  
34  
35  
36  
37  
38  
39  
40  
41  
42  
43  
44  
45  
46  
47  
48  
49  
50  
51  
52  
53  
54  
55  
56  
57  
58  
59  
60

## References

1. We Can End Poverty 2015: Millennium Development Goals. 2011. (Accessed June 15 2011, at <http://www.un.org/millenniumgoals/childhealth.shtml>.)
2. Subramanian SV, Ackerson LK, Davey Smith G, John NA. Association of Maternal Height With Child Mortality, Anthropometric Failure, and Anemia in India. *JAMA* 2009;301:1691-701.
3. Ozaltin E, Hill K, Subramanian SV. Association of maternal stature with offspring mortality, underweight, and stunting in low- to middle-income countries. *JAMA* 2010;303:1507-16.
4. Temin M, Levine R. *Start with a Girl: A New Agenda for Global Health*. Washington D.C.: Center for Global Development; 2009.
5. Kembo J, Van Ginneken JK. Determinants of Infant and Child Mortality in Zimbabwe: Results of Multivariate Hazard Analysis. *Demographic Research* 2009;21:367-84.
6. Knodel J, Herman AT. Effects of birth rank, maternal age, birth interval and sibship on infant and child mortality: Evidence from 18th and 19th Century Reproductive Histories. *American Journal of Public Health* 1984;74:1098-106.
7. Manda SOM. Birth intervals, breastfeeding and determinants of childhood mortality in Malawi. *Social Science & Medicine* 1999;48:301-12.
8. Reynolds HW, Wong EL, Tucker H. Adolescents' Use of Maternal and Child Health Services In Developing Countries. *International Family Planning Perspectives* 2006;32:6-16.
9. Villar J, Belizan J. The relative contribution of prematurity and fetal growth retardation to low birth weight in developing and developed societies. *American Journal of Obstetrics and Gynecology* 1982;143:793-8.
10. Vitolo MR, Gama CM, Bortolini GA, Campagnolo PD, Drachler ML. Some risk factors associated with overweight, stunting and wasting among children under 5 years old. *J Pediatr (Rio J)* 2008;84:251-7.
11. Wang SC, Lee SH, Lee MC, Wang L. The effects of age and aboriginality on the incidence of low birth weight in mountain townships of Taiwan. *Journal of Public Health* 2009;31:406-12.
12. Hobcraft J. Fertility patterns and child survival: a comparative analysis. *Population Bulletin of the United Nations* 1992;33:1-31.
13. Raj A, Saggurti N, Winter M, et al. The effect of maternal child marriage on morbidity and mortality of children under 5 in India: cross sectional study of a nationally representative sample. *Br Med J (Clin Res Ed)* 2010;340.
14. Trussell J, Hammerslough C. A hazards-model analysis of the covariates of infant and child mortality in Sri Lanka. *Demography* 1983;20:1-26.
15. Cooper LG, Leeland NL, Alexander G. Effect of maternal age on birth outcomes among young adolescents. *Social Biology* 1995;42:22-35.
16. Fraser AM, Brockert JE, Ward RH. Association of Young Maternal Age with Adverse Reproductive Outcomes. *N Engl J Med* 1995;332:1113-8.
17. Geronimus AT. On Teenage Childbearing and Neonatal Mortality in the United States. *Population and Development Review* 1987;13:245-79.
18. Geronimus AT, Korenman S, Hillemeier MM. Does Young Maternal Age Adversely Affect Child Development? Evidence from Cousin Comparisons in the United States. *Population and Development Review* 1994;20:585-609.
19. Horon IL, Strobino DM, MacDonald HM. Birth weights among infants born to adolescent and young adult women. *American Journal of Obstetrics and Gynecology* 1983;146:444-9.
20. Trussell J. Teenage pregnancy in the United States. *Family Planning Perspectives* 1988;20:262-72.
21. Ventura SJ, Mathews TJ, Hamilton BE. Births to teenagers in the United States, 1940-2000. *National Vital Statistics Report* 2001;49.
22. Alam N. Teenage motherhood and infant mortality in Bangladesh: Maternal age-dependent effect of parity one. *Journal of biosocial science* 2000;32:229-36.
23. Demographic and Health Surveys. MEASURE DHS, 2009. (Accessed October 3, 2009, 2009, at <http://www.measuredhs.com/start.cfm>.)

- 1 24. Rutstein SO, Rojas G. Guide to DHS Statistics. Calverton, Maryland: ORC Macro, MEASURE DHS+;  
2 2003.
- 3 25. Wirth ME, Wirth E, Delamonica E, Sacks D, Balk A, Minujin A. Monitoring health equity in the  
4 MDGs: A practical guide. New York: CIESIN/UNICEF; 2006.
- 5 26. Vaessen M. The potential of the demographic and health surveys (DHS) for the evaluation and  
6 monitoring of maternal and child health indicators. In: Khat M, ed. Demographic evaluation of health  
7 programmes (Proceedings). Paris: CICRED/UNFPA; 1996.
- 8 27. Pullum TW. An Assessment of the Quality of Data on Health and Nutrition in the DHS Surveys, 1993-  
9 2003. Calverton, Maryland, USA: Macro International Inc; 2008.
- 10 28. Macro O. Demographic and Health Survey Interviewer's Manual. Calverton, Maryland, U.S.A.: : ORC  
11 Macro; 2006.
- 12 29. Survey DaH. Sampling Manual. DHS-III. Calverton, MD: Macro International; 1996.
- 13 30. Borghi E, de Onis M, Garza C, et al. Construction of the World Health Organization child growth  
14 standards: selection of methods for attained growth curves. *Statistics in Medicine* 2006;25:247-65.
- 15 31. Ozaltin E, Hill K, Subramanian SV. Association of Maternal Stature with Offspring Mortality,  
16 Underweight, and Stunting in Low- to Middle-Income Countries. *JAMA* 2010;303:1507-16.
- 17 32. Deaton A. The Analysis of Household Surveys: A Microeconomic Approach to Development Policy.  
18 Baltimore: World Bank; 1997.
- 19 33. Subramanian SV, Ackerson LK, Smith GD. Parental BMI and Childhood Undernutrition in India: An  
20 Assessment of Intrauterine Influence. *Pediatrics* 2010;126:663-71.
- 21 34. Mathews TJ, Hamilton BE. Mean age of mother, 1970-2000. *National Vital Statistics Report* 2002;51.
- 22 35. Bongaarts J. Does Family Planning Reduce Infant Mortality Rates? *Population and Development*  
23 *Review* 1987;13:323-34.
- 24
- 25
- 26
- 27
- 28
- 29
- 30
- 31
- 32
- 33
- 34
- 35
- 36
- 37
- 38
- 39
- 40
- 41
- 42
- 43
- 44
- 45
- 46
- 47
- 48
- 49
- 50
- 51
- 52
- 53
- 54
- 55
- 56
- 57
- 58
- 59
- 60

Appendix  
Table A1: Sample Deduction

|                                             |                 | Infant Mortality |                     | Stunting |                     | Underweight |                     | Wasting |                     | Diarrhoea |                     | Anaemia |                     |
|---------------------------------------------|-----------------|------------------|---------------------|----------|---------------------|-------------|---------------------|---------|---------------------|-----------|---------------------|---------|---------------------|
|                                             |                 | Lost             | Cumulative<br>Total | Lost     | Cumulative<br>Total | Lost        | Cumulative<br>Total | Lost    | Cumulative<br>Total | Lost      | Cumulative<br>Total | Lost    | Cumulative<br>Total |
|                                             |                 |                  |                     |          |                     |             |                     |         |                     |           |                     |         |                     |
| Starting                                    | countries       |                  | 72                  |          | 57                  |             | 57                  |         | 57                  |           | 57                  |         | 33                  |
|                                             | surveys         |                  | 181                 |          | 140                 |             | 140                 |         | 140                 |           | 139                 |         | 46                  |
|                                             | children        |                  | 288,752             |          | 232,676             |             | 232,676             |         | 232,676             |           | 231,211             |         | 81,706              |
| Missing Data on Outcome Variable            |                 | 5,313            | 283,439             | 84,445   | 148,231             | 84,445      | 148,231             | 84,445  | 148,231             | 66,033    | 165,178             | 45,585  | 36,121              |
| Mis-coded Data on Outcome Variables         |                 |                  |                     | 6,365    | 141,866             | 1,780       | 146,451             | 4,701   | 143,530             | 2,242     | 162,936             | 0       | 36,121              |
| Missing Data on Mother's Age at First Birth |                 | 1,564            | 281,875             | 0        | 141,866             | 0           | 146,451             | 0       | 143,530             | 0         | 162,936             | 352     | 35,769              |
| Mother's Age at First Birth <12             |                 | 13               | 281,862             | 4        | 141,862             | 4           | 146,447             | 4       | 143,526             | 5         | 162,931             | 1       | 35,768              |
| Mother's Age at First Birth >35             |                 | 1,716            | 280,146             | 848      | 141,014             | 857         | 145,590             | 840     | 142,686             | 974       | 161,957             | 248     | 35,520              |
| Lost Due to Missing Covariates              |                 | 103,563          | 176,583             | 21,996   | 119,018             | 22,910      | 122,680             | 22,440  | 120,246             | 26,836    | 135,121             | 4,000   | 31,520              |
| Final Total                                 | Countries       |                  | 55                  |          | 55                  |             | 55                  |         | 55                  |           | 55                  |         | 30                  |
|                                             | Surveys         |                  | 118                 |          | 118                 |             | 118                 |         | 118                 |           | 118                 |         | 38                  |
|                                             | <b>Children</b> |                  | <b>176,583</b>      |          | <b>119,018</b>      |             | <b>122,680</b>      |         | <b>120,246</b>      |           | <b>135,121</b>      |         | <b>31,520</b>       |
|                                             | Years           |                  | 1990-2008           |          | 1990-2008           |             | 1990-2008           |         | 1990-2008           |           | 1990-2008           |         | 2000-2008           |



Table A2: Unadjusted Relative Risk Ratios: The Effect of Age At First Birth on Infant Mortality

| Country Name             | Age Band | 12-14                                 | 15-17                                       | 18-20                                 | 21-23                                 | 24-26                                  | 27-29      | 30-32                                  | 33-35                                  |
|--------------------------|----------|---------------------------------------|---------------------------------------------|---------------------------------------|---------------------------------------|----------------------------------------|------------|----------------------------------------|----------------------------------------|
| Pooled                   | 176,583  | 4,322 0.128<br>2.557 (2.227 - 2.935)  | 41,384 0.087<br>1.814 (1.613 - 2.039)       | 61,491 0.061<br>1.375 (1.224 - 1.544) | 38,300 0.048<br>1.168 (1.037 - 1.316) | 18,211 0.044<br>1.126 (0.988 - 1.282)  | 7939 0.037 | 3,493 0.040<br>1.185 (0.975 - 1.440)   | 1,443 0.047<br>1.408 (1.092 - 1.817)   |
| Armenia                  | 1,014    | 68 0                                  | 387 0.012<br>2.02e-07 (2.10e-08 - 1.94e-06) | 338 0.014<br>0.642 (0.0611 - 6.754)   | 137 0.007<br>0.758 (0.0782 - 7.336)   | 20 0.05<br>0.392 (0.0215 - 7.151)      | 50 0.02    | 14 0.071<br>3.194 (0.181 - 56.26)      | 2.907 (0.145 - 58.34)                  |
| Azerbaijan               | 719      | 36 0.111                              | 214 0.023                                   | 233 0.025                             | 127 0.023                             | 29 0                                   | 58 0       | 22 0.136                               |                                        |
| Bangladesh               | 6,175    | 589 0.108<br>1.282 (0.652 - 2.521)    | 2520 0.092<br>1.137 (0.600 - 2.155)         | 1863 0.074<br>0.946 (0.492 - 1.818)   | 750 0.062<br>0.780 (0.396 - 1.535)    | 285 0.077<br>0.972 (0.464 - 2.037)     | 114 0.078  | 37 0.054<br>0.723 (0.164 - 3.187)      | 17 0.176<br>2.334 (0.723 - 7.541)      |
| Benin                    | 3,487    | 55 0.145<br>3.343 (1.190 - 9.391)     | 704 0.117<br>2.715 (1.216 - 6.062)          | 1,262 0.061<br>1.474 (0.652 - 3.333)  | 934 0.072<br>1.749 (0.783 - 3.904)    | 332 0.078<br>1.945 (0.827 - 4.578)     | 141 0.042  | 41 0.097<br>2.398 (0.721 - 7.971)      | 18 0<br>9.00e-07 (3.61e-07 - 2.24e-06) |
| Bolivia                  | 4,024    | 65 0.076<br>2.448 (0.795 - 7.534)     | 829 0.059<br>1.937 (0.884 - 4.242)          | 1,402 0.042<br>1.400 (0.647 - 3.031)  | 855 0.031<br>1.031 (0.458 - 2.324)    | 493 0.022<br>0.709 (0.278 - 1.810)     | 223 0.031  | 102 0.039<br>1.252 (0.379 - 4.133)     | 55 0<br>2.04e-06 (8.92e-07 - 4.69e-06) |
| Brazil                   | 1,280    | 23 0.130<br>6.770 (1.640 - 27.95)     | 280 0.032<br>1.698 (0.371 - 7.759)          | 361 0.024<br>1.305 (0.291 - 5.858)    | 260 0.023<br>1.211 (0.247 - 5.946)    | 178 0.016<br>0.884 (0.145 - 5.374)     | 106 0.018  | 55 0.018<br>0.952 (0.0866 - 10.47)     | 17 0<br>8.75e-06 (2.07e-06 - 3.69e-05) |
| Burkina Faso             | 2,915    | 47 0.234<br>1.430 (0.623 - 3.278)     | 789 0.125<br>0.788 (0.401 - 1.551)          | 1349 0.107<br>0.671 (0.345 - 1.305)   | 510 0.082<br>0.513 (0.257 - 1.022)    | 145 0.096<br>0.607 (0.263 - 1.399)     | 51 0.156   | 18 0.055<br>0.351 (0.0491 - 2.512)     | 6 0.333<br>2.095 (0.605 - 7.254)       |
| Cameroon                 | 2,186    | 91 0.054<br>0.399 (0.131 - 1.212)     | 742 0.091<br>0.723 (0.325 - 1.605)          | 789 0.045<br>0.365 (0.159 - 0.834)    | 343 0.072<br>0.559 (0.232 - 1.347)    | 147 0.040<br>0.320 (0.102 - 1.007)     | 51 0.117   | 21 0.047<br>0.369 (0.0476 - 2.866)     | 2 0<br>2.30e-05 (4.46e-06 - 0.000119)  |
| Central African Republic | 653      | 30 0.133                              | 247 0.153                                   | 231 0.116                             | 87 0.160                              | 28 0.142                               | 20 0.15    | 6 0                                    | 4 0                                    |
| Chad                     | 1,763    | 104 0.153<br>0.957 (0.307 - 2.987)    | 742 0.141<br>0.857 (0.300 - 2.447)          | 555 0.104<br>0.627 (0.221 - 1.779)    | 249 0.092<br>0.564 (0.180 - 1.767)    | 88 0.136<br>0.836 (0.252 - 2.766)      | 19 0.157   | 5 0<br>4.82e-09 (1.23e-09 - 1.88e-08)  | 1 0<br>4.01e-09 (3.81e-10 - 4.22e-08)  |
| Colombia                 | 6,761    | 142 0.035<br>3.995 (1.069 - 14.94)    | 1436 0.019<br>2.253 (0.790 - 6.426)         | 2098 0.016<br>1.842 (0.653 - 5.195)   | 1400 0.012<br>1.481 (0.498 - 4.406)   | 804 0.009<br>1.105 (0.335 - 3.646)     | 469 0.008  | 260 0.019<br>2.046 (0.554 - 7.564)     | 152 0.006<br>0.736 (0.0827 - 6.557)    |
| Comoros                  | 234      | 5 0<br>6.58e-07 (4.90e-08 - 8.84e-06) | 42 0.142<br>2.041 (0.261 - 15.99)           | 64 0.031<br>0.444 (0.0329 - 5.999)    | 63 0.079<br>1.129 (0.109 - 11.75)     | 30 0<br>4.88e-07 (6.34e-08 - 3.76e-06) | 18 0.055   | 7 0.142<br>1.794 (0.114 - 28.26)       | 5 0.2<br>2.603 (0.206 - 32.86)         |
| Congo Dem. Rep.          | 1,180    | 27 0.148<br>2.739 (0.508 - 14.78)     | 262 0.099<br>1.868 (0.442 - 7.902)          | 467 0.104<br>1.999 (0.485 - 8.234)    | 276 0.072<br>1.373 (0.324 - 5.814)    | 87 0.126<br>2.379 (0.545 - 10.38)      | 38 0.052   | 14 0<br>2.99e-06 (6.89e-07 - 1.30e-05) | 9 0.111<br>2.095 (0.192 - 22.84)       |

|    |                    |        |                                |                        |                       |                       |                                |            |                                |                                |
|----|--------------------|--------|--------------------------------|------------------------|-----------------------|-----------------------|--------------------------------|------------|--------------------------------|--------------------------------|
| 1  | Congo Rep.         | 940    | 15 0.066                       | 261 0.091              | 370 0.081             | 165 0.054             | 72 0.055                       | 37 0.054   | 11 0.090                       | 9 0.111                        |
| 2  |                    |        | 1.238 (0.122 - 12.55)          | 1.655 (0.402 - 6.818)  | 1.493 (0.373 - 5.972) | 0.991 (0.221 - 4.457) | 1.067 (0.202 - 5.641)          |            | 1.773 (0.172 - 18.27)          | 1.925 (0.203 - 18.25)          |
| 3  | Cote d'Ivoire      | 1,023  | 70 0.171                       | 424 0.129              | 325 0.104             | 134 0.067             | 41 0.073                       | 23 0.043   | 4 0.25                         | 2 0                            |
| 4  |                    |        | 3.618 (0.478 - 27.41)          | 2.860 (0.388 - 21.07)  | 2.428 (0.334 - 17.64) | 1.503 (0.189 - 11.98) | 1.638 (0.177 - 15.18)          |            | 9.130 (0.787 - 105.9)          | 3.38e-06 (3.14e-07 - 3.65e-05) |
| 5  |                    |        |                                |                        |                       |                       |                                |            |                                |                                |
| 6  | Dominican Republic | 6,442  | 204 0.058                      | 1,806 0.023            | 2,027 0.022           | 1,202 0.022           | 638 0.021                      | 308 0.009  | 173 0.017                      | 84 0.011                       |
| 7  |                    |        | 5.922 (1.697 - 20.67)          | 2.485 (0.773 - 7.984)  | 2.313 (0.719 - 7.444) | 2.292 (0.726 - 7.231) | 2.270 (0.656 - 7.853)          |            | 1.734 (0.347 - 8.674)          | 1.198 (0.128 - 11.24)          |
| 8  |                    |        |                                |                        |                       |                       |                                |            |                                |                                |
| 9  | Egypt Arab Rep.    | 11,852 | 40 0.15                        | 1187 0.064             | 3862 0.036            | 3482 0.022            | 1990 0.033                     | 820 0.028  | 335 0.032                      | 136 0.029                      |
| 10 |                    |        | 4.268 (1.887 - 9.655)          | 2.064 (1.304 - 3.268)  | 1.294 (0.840 - 1.993) | 0.792 (0.499 - 1.256) | 1.165 (0.729 - 1.862)          |            | 1.173 (0.580 - 2.372)          | 1.032 (0.362 - 2.946)          |
| 11 |                    |        |                                |                        |                       |                       |                                |            |                                |                                |
| 12 | Ethiopia           | 2,895  | 60 0.166                       | 788 0.109              | 968 0.088             | 646 0.058             | 281 0.110                      | 88 0.102   | 49 0.142                       | 15 0.066                       |
| 13 |                    |        | 1.889 (0.828 - 4.309)          | 1.147 (0.613 - 2.147)  | 0.894 (0.473 - 1.690) | 0.592 (0.298 - 1.176) | 1.072 (0.535 - 2.149)          |            | 1.420 (0.580 - 3.473)          | 0.649 (0.0845 - 4.979)         |
| 14 |                    |        |                                |                        |                       |                       |                                |            |                                |                                |
| 15 | Gabon              | 709    | 41 0.097                       | 292 0.051              | 238 0.050             | 88 0.034              | 28 0.035                       | 16 0       | 6 0                            |                                |
| 16 |                    |        |                                |                        |                       |                       |                                |            |                                |                                |
| 17 | Ghana              | 1,949  | 11 0.272                       | 322 0.059              | 732 0.049             | 477 0.046             | 252 0.035                      | 91 0.043   | 43 0.093                       | 21 0.047                       |
| 18 |                    |        | 5.705 (1.384 - 23.52)          | 1.411 (0.487 - 4.089)  | 1.154 (0.410 - 3.248) | 1.061 (0.380 - 2.958) | 0.841 (0.262 - 2.699)          |            | 2.305 (0.597 - 8.899)          | 1.264 (0.143 - 11.17)          |
| 19 |                    |        |                                |                        |                       |                       |                                |            |                                |                                |
| 20 | Guatemala          | 1,454  | 38 0.105                       | 428 0.058              | 538 0.055             | 270 0.048             | 104 0.038                      | 42 0.071   | 26 0.038                       | 8 0                            |
| 21 |                    |        | 1.550 (0.383 - 6.276)          | 0.845 (0.269 - 2.656)  | 0.809 (0.262 - 2.501) | 0.688 (0.204 - 2.317) | 0.541 (0.128 - 2.282)          |            | 0.518 (0.0536 - 5.010)         | 7.68e-06 (2.06e-06 - 2.86e-05) |
| 22 |                    |        |                                |                        |                       |                       |                                |            |                                |                                |
| 23 | Guinea             | 1,409  | 104 0.105                      | 556 0.100              | 410 0.080             | 205 0.092             | 88 0.102                       | 29 0.034   | 13 0.153                       | 4 0                            |
| 24 |                    |        | 3.039 (0.418 - 22.09)          | 2.966 (0.431 - 20.44)  | 2.329 (0.333 - 16.30) | 2.825 (0.390 - 20.48) | 3.310 (0.445 - 24.59)          |            | 5.347 (0.549 - 52.12)          | 1.99e-05 (2.25e-06 - 0.000176) |
| 25 |                    |        |                                |                        |                       |                       |                                |            |                                |                                |
| 26 | Haiti              | 1,514  | 16 0.062                       | 295 0.105              | 485 0.068             | 330 0.042             | 188 0.063                      | 110 0.054  | 64 0.031                       | 26 0.076                       |
| 27 |                    |        | 1.084 (0.143 - 8.197)          | 1.874 (0.790 - 4.447)  | 1.211 (0.519 - 2.826) | 0.752 (0.294 - 1.920) | 1.097 (0.425 - 2.833)          |            | 0.613 (0.125 - 2.997)          | 1.514 (0.332 - 6.904)          |
| 28 |                    |        |                                |                        |                       |                       |                                |            |                                |                                |
| 29 | Honduras           | 2,390  | 56 0.035                       | 689 0.024              | 866 0.021             | 434 0.018             | 203 0                          | 70 0.014   | 47 0                           | 25 0.08                        |
| 30 |                    |        | 2.440 (0.225 - 26.49)          | 1.695 (0.230 - 12.48)  | 1.499 (0.203 - 11.06) | 1.267 (0.156 - 10.32) | 9.79e-07 (1.38e-07 - 6.95e-06) |            | 9.96e-07 (1.39e-07 - 7.13e-06) | 5.147 (0.458 - 57.85)          |
| 31 |                    |        |                                |                        |                       |                       |                                |            |                                |                                |
| 32 | India              | 38,794 | 842 0.136                      | 7641 0.098             | 13868 0.062           | 9293 0.048            | 4464 0.044                     | 1767 0.030 | 684 0.036                      | 235 0.063                      |
| 33 |                    |        | 4.200 (3.067 - 5.750)          | 3.063 (2.335 - 4.017)  | 1.977 (1.511 - 2.586) | 1.559 (1.184 - 2.053) | 1.438 (1.074 - 1.924)          |            | 1.223 (0.765 - 1.957)          | 2.064 (1.191 - 3.576)          |
| 34 |                    |        |                                |                        |                       |                       |                                |            |                                |                                |
| 35 | Jordan             | 3,007  | 1 0                            | 284 0.010              | 843 0.028             | 911 0.026             | 579 0.018                      | 251 0.015  | 105 0.009                      | 33 0.030                       |
| 36 |                    |        | 1.84e-07 (1.79e-08 - 1.89e-06) | 0.627 (0.144 - 2.741)  | 1.641 (0.597 - 4.514) | 1.544 (0.579 - 4.117) | 1.092 (0.362 - 3.291)          |            | 0.567 (0.0646 - 4.974)         | 1.931 (0.249 - 14.98)          |
| 37 |                    |        |                                |                        |                       |                       |                                |            |                                |                                |
| 38 | Kazakhstan         | 801    | 48 0.020                       | 279 0.032              | 262 0.045             | 117 0.042             | 29 0                           | 54 0.037   | 12 0                           |                                |
| 39 |                    |        |                                | 0.468 (0.0471 - 4.656) | 0.838 (0.178 - 3.942) | 1.167 (0.258 - 5.286) | 1.158 (0.234 - 5.714)          |            | 1.50e-07 (3.47e-08 - 6.51e-07) | 1.35e-07 (2.77e-08 - 6.57e-07) |
| 40 |                    |        |                                |                        |                       |                       |                                |            |                                |                                |
| 41 | Kenya              | 3,040  | 62 0.064                       | 683 0.067              | 1196 0.042            | 666 0.036             | 281 0.046                      | 103 0.029  | 41 0.048                       | 8 0                            |
| 42 |                    |        | 2.561 (0.585 - 11.21)          | 2.349 (0.757 - 7.286)  | 1.532 (0.493 - 4.765) | 1.247 (0.401 - 3.877) | 1.560 (0.463 - 5.259)          |            | 1.646 (0.285 - 9.509)          | 4.80e-06 (1.27e-06 - 1.82e-05) |
| 43 |                    |        |                                |                        |                       |                       |                                |            |                                |                                |
| 44 | Kyrgyz Republic    | 388    | 20 0.1                         | 188 0.053              | 114 0.026             | 39 0.025              | 2 0                            | 21 0.047   | 4 0.25                         |                                |
| 45 |                    |        |                                |                        |                       |                       |                                |            |                                |                                |
| 46 |                    |        |                                |                        |                       |                       |                                |            |                                |                                |
| 47 |                    |        |                                |                        |                       |                       |                                |            |                                |                                |
| 48 |                    |        |                                |                        |                       |                       |                                |            |                                |                                |
| 49 |                    |        |                                |                        |                       |                       |                                |            |                                |                                |

|    |            |        |                                |                       |                        |                        |                        |                                |                                |                                |
|----|------------|--------|--------------------------------|-----------------------|------------------------|------------------------|------------------------|--------------------------------|--------------------------------|--------------------------------|
| 1  |            |        | 1.586 (0.146 - 17.26)          | 0.883 (0.113 - 6.895) | 0.431 (0.0458 - 4.067) | 0.395 (0.0242 - 6.458) |                        | 1.72e-06 (1.38e-07 - 2.14e-05) | 3.645 (0.289 - 46.05)          |                                |
| 2  | Lesotho    | 749    | 4 0.5                          | 165 0.054             | 339 0.073              | 170 0.070              | 37 0.027               | 18 0.055                       | 12 0.083                       | 4 0                            |
| 3  |            |        | 4.978 (0.582 - 42.61)          | 0.770 (0.101 - 5.877) | 1.098 (0.166 - 7.254)  | 0.965 (0.136 - 6.850)  | 0.358 (0.0245 - 5.225) |                                | 1.226 (0.102 - 14.82)          | 6.84e-06 (7.88e-07 - 5.94e-05) |
| 4  |            |        |                                |                       |                        |                        |                        |                                |                                |                                |
| 5  | Liberia    | 940    | 30 0.266                       | 280 0.075             | 351 0.059              | 174 0.051              | 64 0.015               | 19 0.105                       | 17 0.117                       | 5 0.2                          |
| 6  |            |        | 2.732 (0.639 - 11.69)          | 0.736 (0.185 - 2.931) | 0.616 (0.152 - 2.493)  | 0.544 (0.124 - 2.385)  | 0.160 (0.0156 - 1.649) |                                | 1.115 (0.175 - 7.122)          | 2.044 (0.223 - 18.78)          |
| 7  |            |        |                                |                       |                        |                        |                        |                                |                                |                                |
| 8  | Madagascar | 3,753  | 203 0.152                      | 1179 0.067            | 1196 0.051             | 645 0.049              | 287 0.048              | 141 0.078                      | 60 0.083                       | 42 0.095                       |
| 9  |            |        | 1.732 (0.926 - 3.240)          | 0.817 (0.447 - 1.493) | 0.617 (0.333 - 1.145)  | 0.638 (0.331 - 1.230)  | 0.594 (0.278 - 1.267)  |                                | 1.063 (0.375 - 3.013)          | 1.315 (0.471 - 3.675)          |
| 10 |            |        |                                |                       |                        |                        |                        |                                |                                |                                |
| 11 | Malawi     | 4,557  | 69 0.159                       | 1346 0.135            | 2149 0.111             | 759 0.115              | 170 0.105              | 44 0.045                       | 14 0.214                       | 6 0.166                        |
| 12 |            |        | 3.622 (0.828 - 15.85)          | 3.079 (0.775 - 12.24) | 2.590 (0.651 - 10.31)  | 2.629 (0.652 - 10.59)  | 2.455 (0.578 - 10.42)  |                                | 4.957 (0.889 - 27.64)          | 3.441 (0.356 - 33.23)          |
| 13 |            |        |                                |                       |                        |                        |                        |                                |                                |                                |
| 14 | Mali       | 4,481  | 223 0.255                      | 1801 0.147            | 1438 0.131             | 625 0.129              | 244 0.106              | 100 0.07                       | 32 0.187                       | 18 0.055                       |
| 15 |            |        | 3.850 (1.867 - 7.939)          | 2.145 (1.054 - 4.366) | 1.946 (0.950 - 3.986)  | 1.911 (0.924 - 3.953)  | 1.551 (0.705 - 3.412)  |                                | 2.835 (1.052 - 7.644)          | 0.774 (0.102 - 5.864)          |
| 16 | Moldova    | 630    | 34 0.029                       | 187 0.021             | 224 0.004              | 108 0                  | 21 0                   | 50 0                           | 6 0                            |                                |
| 17 |            |        |                                |                       |                        |                        |                        |                                |                                |                                |
| 18 | Morocco    | 2,064  | 10 0.3                         | 212 0.066             | 587 0.059              | 539 0.048              | 316 0.041              | 218 0.050                      | 119 0.008                      | 63 0                           |
| 19 |            |        | 5.342 (1.108 - 25.77)          | 1.325 (0.622 - 2.822) | 1.176 (0.605 - 2.283)  | 0.969 (0.490 - 1.916)  | 0.790 (0.349 - 1.787)  |                                | 0.183 (0.0238 - 1.410)         | 4.05e-07 (2.03e-07 - 8.07e-07) |
| 20 |            |        |                                |                       |                        |                        |                        |                                |                                |                                |
| 21 | Mozambique | 2,617  | 108 0.277                      | 947 0.126             | 947 0.102              | 399 0.092              | 141 0.134              | 42 0.071                       | 29 0                           | 4 0.25                         |
| 22 |            |        | 3.760 (1.211 - 11.68)          | 1.932 (0.647 - 5.766) | 1.557 (0.513 - 4.726)  | 1.362 (0.435 - 4.264)  | 1.984 (0.644 - 6.113)  |                                | 1.01e-06 (3.18e-07 - 3.18e-06) | 3.180 (0.465 - 21.77)          |
| 23 |            |        |                                |                       |                        |                        |                        |                                |                                |                                |
| 24 | Namibia    | 2,715  | 34 0.058                       | 559 0.055             | 995 0.041              | 602 0.039              | 298 0.033              | 143 0.013                      | 56 0.053                       | 28 0.035                       |
| 25 |            |        | 3.788 (0.569 - 25.21)          | 4.094 (1.012 - 16.57) | 2.998 (0.753 - 11.93)  | 2.843 (0.694 - 11.66)  | 2.573 (0.582 - 11.37)  |                                | 3.971 (0.690 - 22.86)          | 2.688 (0.261 - 27.71)          |
| 26 |            |        |                                |                       |                        |                        |                        |                                |                                |                                |
| 27 | Nicaragua  | 3,296  | 127 0.023                      | 1153 0.052            | 1100 0.026             | 494 0.026              | 246 0.020              | 113 0.008                      | 49 0.020                       | 14 0.071                       |
| 28 |            |        | 2.591 (0.270 - 24.89)          | 5.875 (0.813 - 42.45) | 2.949 (0.401 - 21.68)  | 3.004 (0.394 - 22.92)  | 2.322 (0.273 - 19.77)  |                                | 2.253 (0.142 - 35.64)          | 8.007 (0.520 - 123.3)          |
| 29 |            |        |                                |                       |                        |                        |                        |                                |                                |                                |
| 30 | Niger      | 1,793  | 89 0.134                       | 767 0.134             | 546 0.122              | 257 0.085              | 84 0.035               | 29 0.068                       | 17 0.058                       | 4 0                            |
| 31 |            |        | 1.746 (0.420 - 7.262)          | 1.751 (0.463 - 6.622) | 1.646 (0.431 - 6.282)  | 1.165 (0.295 - 4.607)  | 0.502 (0.0894 - 2.820) |                                | 0.851 (0.0803 - 9.023)         | 1.20e-08 (2.30e-09 - 6.24e-08) |
| 32 |            |        |                                |                       |                        |                        |                        |                                |                                |                                |
| 33 | Nigeria    | 5,825  | 206 0.155                      | 1630 0.108            | 1571 0.081             | 1246 0.077             | 699 0.055              | 314 0.073                      | 117 0.085                      | 42 0.142                       |
| 34 |            |        | 2.100 (1.254 - 3.517)          | 1.451 (0.958 - 2.198) | 1.098 (0.720 - 1.674)  | 1.046 (0.682 - 1.605)  | 0.755 (0.464 - 1.228)  |                                | 1.142 (0.566 - 2.307)          | 2.013 (0.867 - 4.676)          |
| 35 |            |        |                                |                       |                        |                        |                        |                                |                                |                                |
| 36 | Pakistan   | 874    | 19 0.105                       | 157 0.050             | 261 0.091              | 244 0.098              | 118 0.076              | 56 0.089                       | 13 0.153                       | 6 0                            |
| 37 |            |        | 1.078 (0.220 - 5.290)          | 0.563 (0.178 - 1.775) | 0.989 (0.396 - 2.467)  | 1.090 (0.433 - 2.744)  | 0.846 (0.297 - 2.411)  |                                | 1.629 (0.351 - 7.557)          | 2.49e-06 (7.75e-07 - 7.98e-06) |
| 38 |            |        |                                |                       |                        |                        |                        |                                |                                |                                |
| 39 | Paraguay   | 696    | 10 0                           | 126 0.055             | 238 0.033              | 148 0.020              | 87 0.034               | 58 0.017                       | 21 0                           | 8 0                            |
| 40 |            |        | 2.74e-06 (3.47e-07 - 2.16e-05) | 3.320 (0.415 - 26.59) | 1.955 (0.246 - 15.57)  | 1.246 (0.131 - 11.89)  | 2.073 (0.215 - 20.00)  |                                | 3.26e-06 (4.32e-07 - 2.46e-05) | 2.85e-06 (3.41e-07 - 2.39e-05) |
| 41 |            |        |                                |                       |                        |                        |                        |                                |                                |                                |
| 42 | Peru       | 11,259 | 172 0.087                      | 2114 0.038            | 3680 0.027             | 2568 0.022             | 1346 0.020             | 778 0.021                      | 431 0.016                      | 170 0.005                      |
| 43 |            |        | 3.902 (1.989 - 7.654)          | 1.707 (1.018 - 2.861) | 1.242 (0.748 - 2.061)  | 0.987 (0.582 - 1.673)  | 0.895 (0.492 - 1.630)  |                                | 0.729 (0.305 - 1.745)          | 0.263 (0.0350 - 1.985)         |
| 44 |            |        |                                |                       |                        |                        |                        |                                |                                |                                |
| 45 |            |        |                                |                       |                        |                        |                        |                                |                                |                                |
| 46 |            |        |                                |                       |                        |                        |                        |                                |                                |                                |
| 47 |            |        |                                |                       |                        |                        |                        |                                |                                |                                |
| 48 |            |        |                                |                       |                        |                        |                        |                                |                                |                                |
| 49 |            |        |                                |                       |                        |                        |                        |                                |                                |                                |

|    |              |       |                                |                       |                        |                       |                       |           |                                |                                |
|----|--------------|-------|--------------------------------|-----------------------|------------------------|-----------------------|-----------------------|-----------|--------------------------------|--------------------------------|
| 1  | Rwanda       | 2,930 | 15 0.133                       | 243 0.106             | 1032 0.105             | 948 0.081             | 451 0.082             | 164 0.103 | 61 0.081                       | 16 0.25                        |
| 2  |              |       | 1.220 (0.306 - 4.873)          | 0.996 (0.551 - 1.801) | 0.999 (0.615 - 1.623)  | 0.792 (0.482 - 1.302) | 0.790 (0.455 - 1.371) |           | 0.785 (0.265 - 2.326)          | 2.203 (0.774 - 6.270)          |
| 3  | Senegal      | 1,260 | 41 0.121                       | 329 0.103             | 398 0.062              | 292 0.041             | 114 0.061             | 55 0.036  | 20 0.1                         | 11 0.272                       |
| 4  |              |       | 3.306 (0.679 - 16.10)          | 2.870 (0.690 - 11.93) | 1.705 (0.414 - 7.032)  | 1.139 (0.259 - 5.018) | 1.673 (0.353 - 7.933) |           | 2.799 (0.412 - 19.01)          | 7.708 (1.553 - 38.25)          |
| 5  |              |       |                                |                       |                        |                       |                       |           |                                |                                |
| 6  | Sierra Leone | 663   | 29 0.103                       | 184 0.081             | 190 0.094              | 157 0.082             | 55 0.054              | 31 0.064  | 9 0                            | 8 0                            |
| 7  |              |       | 1.703 (0.294 - 9.846)          | 1.325 (0.314 - 5.583) | 1.563 (0.369 - 6.614)  | 1.364 (0.308 - 6.045) | 0.904 (0.161 - 5.067) |           | 4.49e-07 (9.69e-08 - 2.08e-06) | 4.02e-07 (8.67e-08 - 1.87e-06) |
| 8  |              |       |                                |                       |                        |                       |                       |           |                                |                                |
| 9  | Swaziland    | 620   | 10 0.1                         | 177 0.101             | 251 0.043              | 106 0.103             | 50 0.08               | 16 0.125  | 8 0.125                        | 2 0                            |
| 10 |              |       | 0.679 (0.0697 - 6.608)         | 0.730 (0.186 - 2.864) | 0.321 (0.0750 - 1.376) | 0.804 (0.198 - 3.268) | 0.607 (0.126 - 2.924) |           | 0.850 (0.0868 - 8.325)         | 3.22e-06 (4.68e-07 - 2.22e-05) |
| 11 |              |       |                                |                       |                        |                       |                       |           |                                |                                |
| 12 | Tanzania     | 2,511 | 27 0.222                       | 675 0.094             | 1,085 0.088            | 476 0.056             | 162 0.086             | 59 0.050  | 22 0.090                       | 5 0                            |
| 13 |              |       | 4.229 (1.138 - 15.71)          | 1.754 (0.567 - 5.430) | 1.648 (0.534 - 5.091)  | 1.060 (0.330 - 3.399) | 1.636 (0.483 - 5.543) |           | 1.769 (0.318 - 9.844)          | 1.80e-06 (4.28e-07 - 7.54e-06) |
| 14 |              |       |                                |                       |                        |                       |                       |           |                                |                                |
| 15 | Togo         | 801   | 13 0.076                       | 158 0.132             | 310 0.070              | 179 0.089             | 95 0.042              | 31 0.032  | 11 0.181                       | 4 0.5                          |
| 16 |              |       | 2.139 (0.139 - 32.95)          | 4.081 (0.544 - 30.59) | 2.152 (0.287 - 16.14)  | 2.625 (0.357 - 19.33) | 1.238 (0.139 - 10.99) |           | 5.772 (0.566 - 58.89)          | 15.67 (1.863 - 131.8)          |
| 17 |              |       |                                |                       |                        |                       |                       |           |                                |                                |
| 18 | Turkey       | 1,878 | 4 0                            | 229 0.052             | 659 0.039              | 530 0.033             | 272 0.025             | 115 0.034 | 52 0.057                       | 17 0                           |
| 19 |              |       | 8.48e-06 (2.05e-06 - 3.51e-05) | 1.470 (0.480 - 4.502) | 1.137 (0.401 - 3.222)  | 0.975 (0.327 - 2.909) | 0.747 (0.210 - 2.665) |           | 1.713 (0.405 - 7.246)          | 7.86e-06 (2.45e-06 - 2.52e-05) |
| 20 |              |       |                                |                       |                        |                       |                       |           |                                |                                |
| 21 | Uganda       | 2,813 | 68 0.117                       | 916 0.117             | 1165 0.089             | 438 0.075             | 170 0.076             | 41 0      | 13 0.230                       | 2 0                            |
| 22 |              |       |                                |                       |                        |                       |                       |           |                                |                                |
| 23 | Uzbekistan   | 559   | 27 0                           | 263 0.03              | 205 0.058              | 38 0.105              | 5 0                   | 18 0      | 3 0                            |                                |
| 24 |              |       |                                |                       |                        |                       |                       |           |                                |                                |
| 25 | Zambia       | 3,321 | 52 0.134                       | 1116 0.128            | 1428 0.095             | 497 0.09              | 153 0.078             | 54 0.07   | 16 0.125                       | 5 0.2                          |
| 26 |              |       | (0.541 - 1.799 5.984)          | (0.614 - 1.631 4.333) | (0.467 - 1.242 3.300)  | (0.441 - 1.204 3.288) | (0.342 - 1.033 3.121) |           | (0.295 - 1.460 7.218)          | (0.432 - 3.706 31.78)          |
| 27 | Zimbabwe     | 1,980 | 21 0.142                       | 439 0.052             | 888 0.057              | 401 0.047             | 160 0.05              | 44 0.05   | 21 0.047                       | 6 0                            |
| 28 |              |       | (0.534 - 3.018 17.07)          | (0.267 - 1.053 4.159) | (0.310 - 1.184 4.525)  | (0.246 - 0.980 3.904) | (0.230 - 1.011 4.441) |           | (0.0980 - 1.004 10.29)         | (2.35e-06 - 1.12e-05 5.31e-05) |
| 29 |              |       |                                |                       |                        |                       |                       |           |                                |                                |
| 30 |              |       |                                |                       |                        |                       |                       |           |                                |                                |
| 31 |              |       |                                |                       |                        |                       |                       |           |                                |                                |

Note: Each country/age group have four statistics associated with it: number of observations (top right), the fraction of children who died (top left), the relative risk ration (bottom right), and the 95% CI of that RRR (bottom left). Azerbaijan, Gabon, Moldova, Uganda and Uzbekistan excluded from country specific examples as convergence was not achieved for the country specific regressions.

1 **Contributors:** Jocelyn E. Finlay co-led the conception and interpretation of results in this study. She assisted with  
2 drafting the manuscript. She prepared all of the data, empirical analysis, and tables presented in the paper. As  
3 guarantor, she accepts full responsibility for this submitted work, had access to the data, and controlled the decision to  
4 publish. Emre Özaltın assisted with preliminary empirical analysis for this study. David Canning led the conception of this  
5 study and interpretation of study findings as well as assisting with the drafting of the manuscript. Authors have seen and  
6 approved this final submitted version of the manuscript. All authors will provide final approval of the version to be  
7 published.  
8

9 **Funding:** We thank the William and Flora Hewlett Foundation for support of this research. Conception of this paper was  
10 funded by the Centre for Disease Control. Researchers operated independently from the funders on this work, and  
11 funders neither provided nor were required to provide review and approval of this research.  
12

13 **Competing Interests:** None declared  
14

15 **Exclusive License:** "the Corresponding Author has the right to grant on behalf of all authors and does grant on behalf of  
16 all authors, an exclusive licence (or non exclusive for government employees) on a worldwide basis to the BMJ  
17 Publishing Group Ltd and its Licensees to permit this article (if accepted) to be published in BMJ editions and any other  
18 BMJPGI products and sublicenses to exploit all subsidiary rights, as set out in our licence  
19 (<http://resources.bmj.com/bmj/authors/checklists-forms/licence-for-publication>).  
20

### 21 **Ethical Review**

22 The DHS data collection procedures were approved by the ICF Macro International (Calverton, Maryland) Institutional  
23 Review Board as well as by the relevant body in each country which approves research studies on human subjects. Oral  
24 informed consent for the interview/survey was obtained from respondents by interviewers. The current study was  
25 reviewed by Harvard School of Public Health Institutional Review Board (Protocol #20069-101) and was ruled exempt  
26 from full review because the study was based on an anonymous public use data set with no identifiable information on  
27 the survey participants.  
28  
29  
30  
31  
32  
33  
34  
35  
36  
37  
38  
39  
40  
41  
42  
43  
44  
45  
46  
47  
48  
49  
50  
51  
52  
53  
54  
55  
56  
57  
58  
59  
60

STROBE Statement—Checklist of items that should be included in reports of *cross-sectional studies*

**All items below are included in the study entitled:** Association of Maternal Age with Infant Mortality, Child Anthropometric Failure, Diarrhoea, and Anaemia for First Births in Low- and Middle-Income Countries

|                              | Item No | Recommendation                                                                                                                                                                                                                                                                                                                             |
|------------------------------|---------|--------------------------------------------------------------------------------------------------------------------------------------------------------------------------------------------------------------------------------------------------------------------------------------------------------------------------------------------|
| <b>Title and abstract</b>    | 1       | (a) Indicate the study's design with a commonly used term in the title or the abstract<br>(b) Provide in the abstract an informative and balanced summary of what was done and what was found                                                                                                                                              |
| <b>Introduction</b>          |         |                                                                                                                                                                                                                                                                                                                                            |
| Background/rationale         | 2       | Explain the scientific background and rationale for the investigation being reported                                                                                                                                                                                                                                                       |
| Objectives                   | 3       | State specific objectives, including any prespecified hypotheses                                                                                                                                                                                                                                                                           |
| <b>Methods</b>               |         |                                                                                                                                                                                                                                                                                                                                            |
| Study design                 | 4       | Present key elements of study design early in the paper                                                                                                                                                                                                                                                                                    |
| Setting                      | 5       | Describe the setting, locations, and relevant dates, including periods of recruitment, exposure, follow-up, and data collection                                                                                                                                                                                                            |
| Participants                 | 6       | (a) Give the eligibility criteria, and the sources and methods of selection of participants                                                                                                                                                                                                                                                |
| Variables                    | 7       | Clearly define all outcomes, exposures, predictors, potential confounders, and effect modifiers. Give diagnostic criteria, if applicable                                                                                                                                                                                                   |
| Data sources/<br>measurement | 8*      | For each variable of interest, give sources of data and details of methods of assessment (measurement). Describe comparability of assessment methods if there is more than one group                                                                                                                                                       |
| Bias                         | 9       | Describe any efforts to address potential sources of bias                                                                                                                                                                                                                                                                                  |
| Study size                   | 10      | Explain how the study size was arrived at                                                                                                                                                                                                                                                                                                  |
| Quantitative variables       | 11      | Explain how quantitative variables were handled in the analyses. If applicable, describe which groupings were chosen and why                                                                                                                                                                                                               |
| Statistical methods          | 12      | (a) Describe all statistical methods, including those used to control for confounding<br>(b) Describe any methods used to examine subgroups and interactions<br>(c) Explain how missing data were addressed<br>(d) If applicable, describe analytical methods taking account of sampling strategy<br>(e) Describe any sensitivity analyses |
| <b>Results</b>               |         |                                                                                                                                                                                                                                                                                                                                            |
| Participants                 | 13*     | (a) Report numbers of individuals at each stage of study—eg numbers potentially eligible, examined for eligibility, confirmed eligible, included in the study, completing follow-up, and analysed<br>(b) Give reasons for non-participation at each stage<br>(c) Consider use of a flow diagram                                            |
| Descriptive data             | 14*     | (a) Give characteristics of study participants (eg demographic, clinical, social) and information on exposures and potential confounders<br>(b) Indicate number of participants with missing data for each variable of interest                                                                                                            |
| Outcome data                 | 15*     | Report numbers of outcome events or summary measures                                                                                                                                                                                                                                                                                       |
| Main results                 | 16      | (a) Give unadjusted estimates and, if applicable, confounder-adjusted estimates and their precision (eg, 95% confidence interval). Make clear which confounders were adjusted for and why they were included<br>(b) Report category boundaries when continuous variables were categorized                                                  |

(c) If relevant, consider translating estimates of relative risk into absolute risk for a meaningful time period

|                          |    |                                                                                                                                                                            |
|--------------------------|----|----------------------------------------------------------------------------------------------------------------------------------------------------------------------------|
| Other analyses           | 17 | Report other analyses done—eg analyses of subgroups and interactions, and sensitivity analyses                                                                             |
| <b>Discussion</b>        |    |                                                                                                                                                                            |
| Key results              | 18 | Summarise key results with reference to study objectives                                                                                                                   |
| Limitations              | 19 | Discuss limitations of the study, taking into account sources of potential bias or imprecision. Discuss both direction and magnitude of any potential bias                 |
| Interpretation           | 20 | Give a cautious overall interpretation of results considering objectives, limitations, multiplicity of analyses, results from similar studies, and other relevant evidence |
| Generalisability         | 21 | Discuss the generalisability (external validity) of the study results                                                                                                      |
| <b>Other information</b> |    |                                                                                                                                                                            |
| Funding                  | 22 | Give the source of funding and the role of the funders for the present study and, if applicable, for the original study on which the present article is based              |

\*Give information separately for exposed and unexposed groups.

**Note:** An Explanation and Elaboration article discusses each checklist item and gives methodological background and published examples of transparent reporting. The STROBE checklist is best used in conjunction with this article (freely available on the Web sites of PLoS Medicine at <http://www.plosmedicine.org/>, Annals of Internal Medicine at <http://www.annals.org/>, and Epidemiology at <http://www.epidem.com/>). Information on the STROBE Initiative is available at [www.strobe-statement.org](http://www.strobe-statement.org).

1  
2  
3  
4  
5  
6  
7  
8  
9  
10  
11  
12  
13  
14  
15  
16  
17  
18  
19  
20  
21  
22  
23  
24  
25  
26  
27  
28  
29  
30  
31  
32  
33  
34  
35  
36  
37  
38  
39  
40  
41  
42  
43  
44  
45  
46  
47  
48  
49  
50  
51  
52  
53  
54  
55  
56  
57  
58  
59  
60

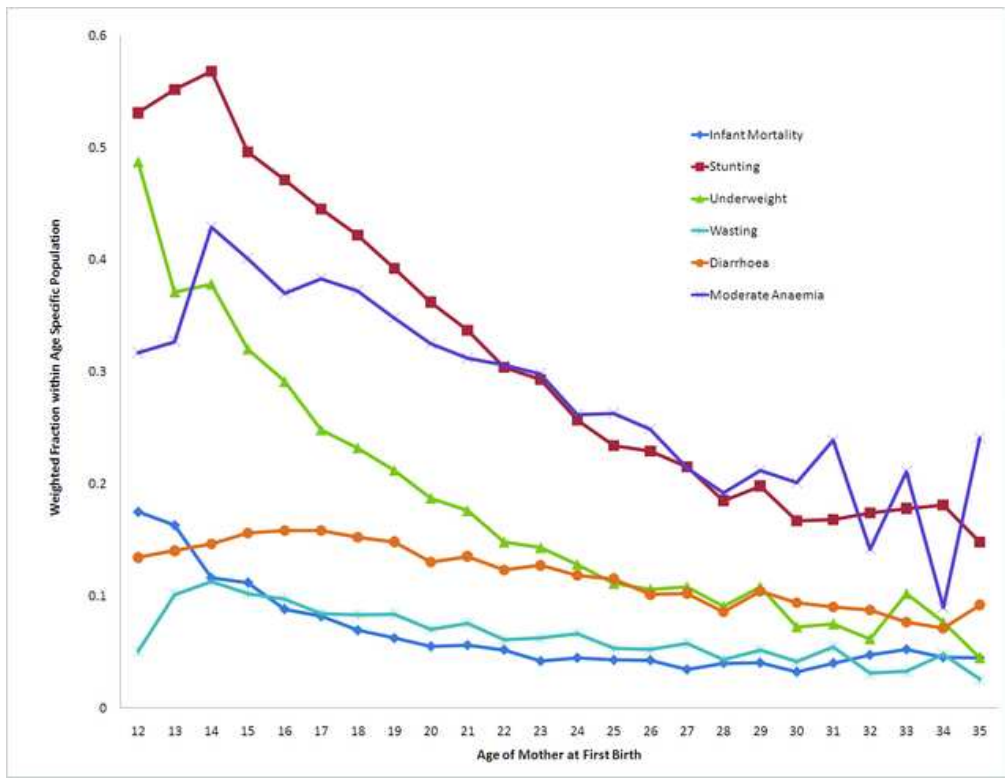

Figure 1: Child Health Indicator Weighted Prevalence by Age of Mother at First Birth  
53x41mm (300 x 300 DPI)



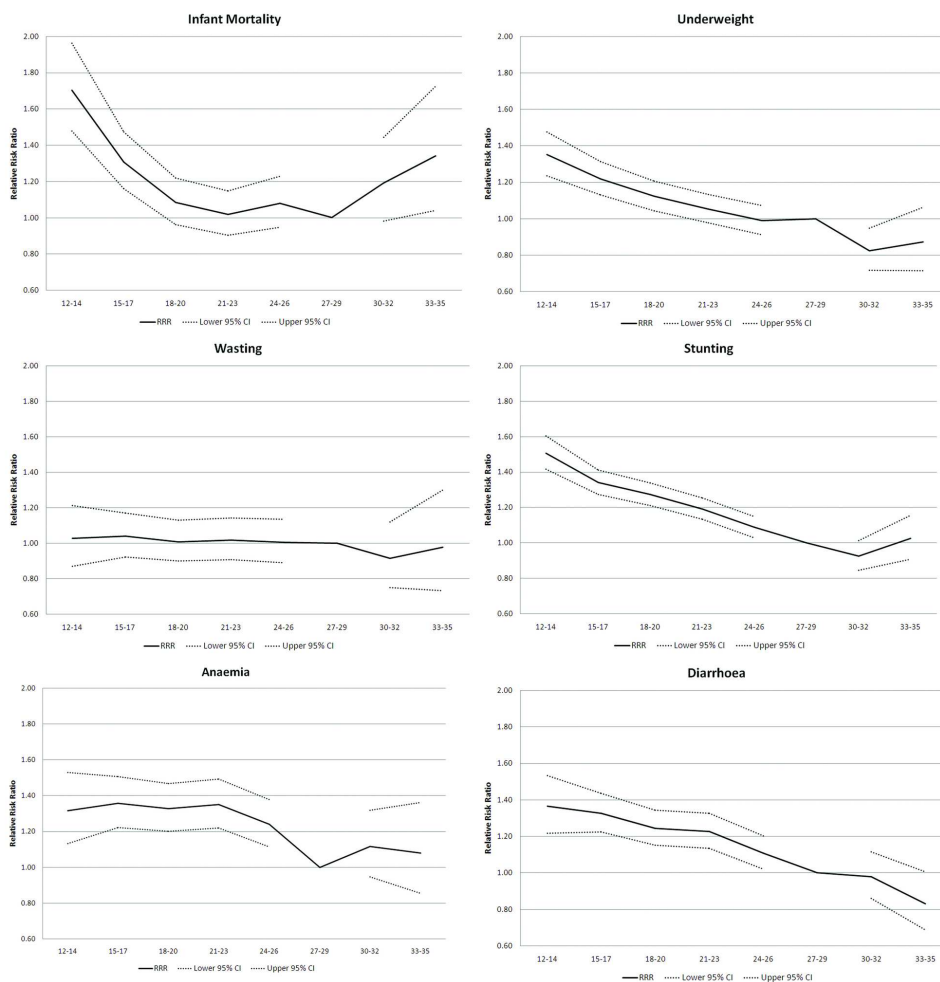

Figure 2: Plot of Adjusted Relative Risk Ratios and 95% Confidence Intervals as per the results tabulated in Table 4  
174x176mm (300 x 300 DPI)

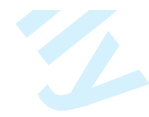

1  
2  
3  
4  
5  
6  
7  
8  
9  
10  
11  
12  
13  
14  
15  
16  
17  
18  
19  
20  
21  
22  
23  
24  
25  
26  
27  
28  
29  
30  
31  
32  
33  
34  
35  
36  
37  
38  
39  
40  
41  
42  
43  
44  
45  
46  
47  
48  
49  
50  
51  
52  
53  
54  
55  
56  
57  
58  
59  
60

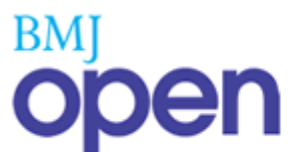

**The Association of Maternal Age with Infant Mortality, Child Anthropometric Failure, Diarrhoea, and Anaemia for First Births: Evidence from 55 Low- and Middle-Income Countries**

|                                 |                                                                                                                                                                                                                                                 |
|---------------------------------|-------------------------------------------------------------------------------------------------------------------------------------------------------------------------------------------------------------------------------------------------|
| Journal:                        | <i>BMJ Open</i>                                                                                                                                                                                                                                 |
| Manuscript ID:                  | bmjopen-2011-000226.R1                                                                                                                                                                                                                          |
| Article Type:                   | Research                                                                                                                                                                                                                                        |
| Date Submitted by the Author:   | 14-Jul-2011                                                                                                                                                                                                                                     |
| Complete List of Authors:       | Finlay, Jocelyn; Harvard School of Public Health, Global Health and Population<br>Ozaltin, Emre; Harvard School of Public Health, Global Health and Population<br>Canning, David; Harvard School of Public Health, Global Health and Population |
| <b>Primary Subject Heading</b>: | Public health                                                                                                                                                                                                                                   |
| Keywords:                       | PUBLIC HEALTH, PREVENTIVE MEDICINE, Community child health < PAEDIATRICS                                                                                                                                                                        |
|                                 |                                                                                                                                                                                                                                                 |

SCHOLARONE™  
Manuscripts

1  
2  
3  
4  
5  
6  
7  
8  
9  
10  
11  
12  
13  
14  
15  
16  
17  
18  
19  
20  
21  
22  
23  
24  
25  
26  
27  
28  
29  
30  
31  
32  
33  
34  
35  
36  
37  
38  
39  
40  
41  
42  
43  
44  
45  
46  
47  
48  
49  
50  
51  
52  
53  
54  
55  
56  
57  
58  
59  
60

**Title**

The Association of Maternal Age with Infant Mortality, Child Anthropometric Failure, Diarrhoea, and Anaemia for First Births: Evidence from 55 Low- and Middle-Income Countries

**Author, Degrees and Affiliation**

Jocelyn E. Finlay, PhD, Department of Global Health and Population, Harvard School of Public Health, USA  
Emre Özalpin, MSc, Department of Global Health and Population, Harvard School of Public Health, USA  
David Canning, PhD, Department of Global Health and Population, Harvard School of Public Health, USA

**Corresponding Author**

Jocelyn E. Finlay, Research Associate, Harvard Centre for Population and Development Studies, 9 Bow St, Cambridge, MA 02138, USA. Tel: 617-372-735; Email: jfinlay@hsph.harvard.edu

**Running head:** Maternal Age and Child Health

For peer review only

1 **Objective:** To examine the association between maternal age at first birth and infant mortality, stunting, underweight,  
2 wasting, diarrhoea and anaemia of children in low- middle-income countries.

3  
4 **Design:** Cross-sectional analysis of nationally representative household samples. A modified Poisson regression model is  
5 used to estimate unadjusted and adjusted relative risk ratios.

6  
7 **Setting:** Low- and middle-income countries

8  
9 **Population:** First births to women aged 12-35 where this birth occurred 12-60 months prior to the interview. The sample  
10 for analysing infant mortality is comprised of 176,583 children in 55 low- and middle-income countries across 118  
11 Demographic and Health Surveys conducted between 1990 and 2008.

12  
13 **Main Outcome Measures:** In children under 12 months: infant mortality. In children under 5 years: stunting,  
14 underweight, wasting, diarrhoea and anaemia.

15  
16 **Results:** The investigation reveals two salient findings. First, in the sample of women who had their first birth between  
17 the ages of 12 and 35, the risk of poor child health outcome is lowest for women who have their first birth between the  
18 ages of 27-29. Secondly, the results indicate that both biological and social mechanisms play a role in explaining why  
19 children of young mothers have poorer outcomes.

20  
21 **Conclusions:** First borns of adolescent mothers are the most vulnerable to infant mortality and poor child health  
22 outcomes. Additionally, first time mothers up to the age of 27 have higher risk of having a child who suffers from  
23 stunting, diarrhoea and moderate or strong anaemia. Maternal and child health programs should take account of this  
24 increased risk even for mothers in their early twenties. Increasing age as first birth in developing countries may have  
25 large benefits in terms of child health.

## 1 Introduction

2 Progress towards reaching Millennium Development Goal 4 focuses on the measurable reduction in under-5  
 3 mortality. In low- to middle-income countries, this also means "revitalizing efforts against...diarrhoea, while bolstering  
 4 nutrition...".<sup>1</sup> The risk of under-5 mortality, and the prevalence of diarrheal disease and nutritional deficiencies that  
 5 manifest themselves in outcomes such as stunting, wasting, underweight and anaemia in young children, underscore the  
 6 need to understand the basic determinants of these poor child health outcomes. In India alone, 6.0% (95% CI 5.7-6.3) of  
 7 children die before their fifth birthday. In the same population, for children under-5, 42.2% are underweight, 47.8% are  
 8 stunted, 19.7% are wasted, and 69.1% are anaemic.<sup>2</sup> A cross-country study highlight that these prevalence percentages  
 9 are the norm throughout low- to middle-income countries.<sup>3</sup> A report on adolescent girls in low- to middle-income  
 10 countries by the Centre for Global Development<sup>4</sup> highlighted the risk to child health associated with young motherhood.  
 11 When considering child health, the report draws on the intergenerational influence on child health outcomes, rather  
 12 than a cross sectional observation of children alone. The effect of the age of mother at first birth on child health  
 13 outcomes has been explored in several studies in low- to middle-income countries.<sup>5-14</sup> In the case of India, Raj *et al*<sup>13</sup>  
 14 show that children born to mothers who were married under the age of 18 were at a higher risk of stunting and  
 15 underweight compared to children of women who had married at age 18 or older. In another study, using the World  
 16 Fertility Survey, Trussell and Hammerslough<sup>14</sup> also found that mothers' age at first birth was a significant risk factors of  
 17 infant mortality in Sri Lanka. In low- to middle-income countries, 26.5% of women have their first birth before the age of  
 18 18, and 83.1% have it before age 24.<sup>15</sup> Much debate, particularly with US population samples, concerns the social versus  
 19 physiological influence of young motherhood on child health outcomes.<sup>16-22</sup> Young age can proxy for "short stature, low  
 20 body weight in relation to height, and greater likelihood of inadequate weight gain during pregnancy along with  
 21 difficulty of delivery."<sup>23</sup> These physiological factors point to vulnerability to poor child health outcomes. Women in low-  
 22 to middle-income countries who have children at a young age are also more likely to be, and remain, poor and  
 23 uneducated.<sup>4</sup> These social factors also disadvantage young mothers in terms of their child's health outcomes. Analysis  
 24 that generalizes across and within countries, rather than focusing on a sample from a single country, provides  
 25 standardized analyses and results to assess age as a proxy for physiological immaturity and social disadvantage and

Deleted: (child health)

Deleted: C

Deleted: ies

Deleted: a few

Deleted: country

Deleted: context

Field Code Changed

Deleted: as minors

Field Code Changed

Deleted: for

its effect on child health outcomes. Earlier work by Hobcraft<sup>12</sup> in 1992 examines the effect of age at first birth on child survival in a number of countries using Demographic and Health Surveys available at that time. Given the prevalence of poor child health outcomes in low- to middle-income countries, and not just high infant mortality, studies that extend the monitoring of child health beyond infant mortality provide valuable information regarding health disparities and progress in achieving Millennium Development Goal 4, and its sub-goals relating to child health.

Deleted: the

Deleted: Early

Deleted: MDG4

The purpose of the current study is to assess the association between maternal age at first birth and child health outcomes: infant mortality, stunting, underweight, wasting, diarrhoea, and anaemia. By controlling for socio-economic factors, the physiological effect of young motherhood on child health can be parsed out from the social disadvantage that young mothers are also likely to face. The findings could critically inform family planning policies and programs aimed at delaying first birth beyond the teenage years.

Deleted: moderate or strong

Deleted: Taking account of confounding socio-economic factors, the

## Methods

### Data Source

Information from 118 Demographic and Health Surveys (DHS) conducted in 55 countries between 1990 and 2008 provided the data for the analysis in this study.<sup>24</sup> The DHS are nationally representative household sample surveys that measure population, health, socio-economic, and anthropometric indicators, emphasizing on maternal and child health.<sup>25</sup> The DHS are important data source for studying population health across developing countries due to extensive coverage, comparability, and data quality.<sup>26-28</sup> To ensure standardization and comparability across diverse sites and time, in conducting the Demographic and Health Surveys, Macro ICF, employs intense interviewer training, standardized measurement tools and techniques, an identical core questionnaire, and instrument pretesting.<sup>29</sup> Each participating country reports detail pretesting and quality assurance measures by survey.<sup>15</sup> The DHS is modular in structure, and in addition to the core questionnaire, a set of country-relevant sections, and country-specific variables are included. The DHS provides data with standardized variables across surveys.<sup>30</sup>

Field Code Changed

Deleted: DHS research

### Sampling Plan

The DHS involves stratified cluster randomized samples of households.<sup>31</sup> The sampling frame was stratified by urban and rural status and additionally by country-specific geographic or administrative regions. Within each stratified

Deleted: Every survey population

Deleted: is

area, random clusters of households were drawn from a list of all enumeration areas taken from a population census. In the second stage of sampling, all private households within the cluster were listed (institutions excluded) and an average of 25 houses within a cluster were selected by equal probability systematic sampling to be surveyed. Detailed sampling plans are available from survey final reports.<sup>15</sup>

- Deleted: are
- Deleted: are
- Deleted: is
- Deleted: are

Within each sampled household a household questionnaire was administered and women eligible for a more detailed women's survey are identified. In most surveys all women between the ages of 15-49 were interviewed. In a limited number of surveys the target group it is women aged 10-49, or 15-45, or ever-married women. The child anthropometry module was conducted in a selection of the Standard Demographic and Health Surveys.<sup>32</sup> The DHS provides weights for calculating nationally representative statistics.

- Deleted: that can be used to make the sample
- Deleted: Note the upper bound is to 60 months rather than 59 to conform to the World Health Organization norm.
- Deleted: is in the sample

**Study Population and Sample Size**

Our sample consists of children born to women who have had their first birth in the period 12-60 months before the survey. The lower bound of 12 months is applied so that each child has equal exposure to one year of life and we can accurately calculate the infant mortality (children who die within the first year of life). Detailed child health measures are only taken for children up to 60 months which establishes our upper bound.<sup>3</sup> Only the first birth for each woman is included in our sample, for multiple births we only use data from the first recorded birth, though we control for this for being a part of multiple births. The initial sample is 288,752 children across 72 countries from 181 surveys. Infant mortality status is not available for 5,313 of these, mothers' age at the first birth is missing in 1,564, 103,563 observations are missing covariates since not all surveys collect data on our covariates of interest ( ), yielding the final sample of 176,583 children across 55 countries and 118 surveys for our mortality study. The age of mother is restricted to 12-35 as only 13 of the mothers had their children at age less than 12 and 1,716 had their first birth at 36 or older. Details of the samples for the child health outcomes are given in the appendix Table A1. These samples are smaller because the child anthropometric module was not conducted in a number of surveys. The stunting data comprises 119,018, wasting 120,246, underweight 122,680, diarrhoea 135,121, and anaemia 31,520 children.

- Deleted: y
- Deleted: a
- Deleted: children reducing the sample to 283,439. Not all
- Deleted: recorded (
- Deleted: missing) reducing the sample to 280,146 children. The age of mother is restricted to 12-35 as only 13 of the mothers had their children at age less than 12 and 1716 had their first birth at 36 or older. This leaves the sample at 280,146.
- Deleted: We lose a significant number of observations due to
- Deleted: all
- Deleted: 103,563 observations lost ),
- Deleted: ,these
- Deleted: due to
- Deleted: set is based on
- Deleted: children
- Deleted: the
- Deleted: data set is based on
- Deleted: children
- Deleted: the
- Deleted: data set is based on
- Deleted: children
- Deleted: the
- Deleted: data set is based on
- Deleted: children
- Deleted: the
- Deleted: data set is based on

<sup>1</sup>Note the upper bound is 60 months rather than 59 months to conform to the World Health Organization age categories.

**Outcome Measures**

1 In this study, we focus on six outcomes: infant mortality, child stunting, underweight, wasting, diarrhoea, and  
 2 moderate to severe anaemia (which is abbreviated to moderate anaemia throughout the paper). All health measures are  
 3 for children born 12-60 months prior to the interview. Infant mortality is a measure of whether or not the child survived  
 4 to age 1 year. The birth history in the Demographic and Health Surveys Individual Recode records the survival status of a  
 5 woman's (respondent's) child. A child's death and age of death is reported by the mother. For the measure of infant  
 6 mortality, we count infants who passed away within the first year of life (<12 months). We also measure anthropometric  
 7 failure. First, we calculate a z-score given by the child's height minus the median height for that child's age and sex in a  
 8 reference population. Then we divide by the standard deviation of the same age and sex in the World Health  
 9 Organization reference population of healthy children in developing countries.<sup>33</sup> Stunting is defined as a height z-score  
 10 of less than minus two. Similarly, underweight is defined as a z-score less than minus two for weight relative to children  
 11 of the same sex and age in the reference population. Wasting is defined as a z-score less than minus two for weight-to-  
 12 height relative to children of the same sex and age in the reference population. Biologically impossible values are  
 13 defined by the WHO for height (stunting) as z-scores <-6 or >6; for weight (underweight) as <-6 or >5; and for weight for  
 14 height (wasting) as <-5 or >5. Observations with biologically impossible values are dropped from our samples.

Deleted: d  
 Deleted: this  
 Deleted: group  
 Deleted: reference population. We use the

15 The outcome of child diarrhoea was based on the mother's recall of whether their child has had diarrhoea within  
 16 the two weeks prior to interview. Anaemia was measured by a fingerstick blood test from the child at the time of  
 17 interview. The first two drops of blood were discarded and the third drop was taken as a sample. The blood drop was  
 18 analyzed using the HemoCue system. Adjustments for altitude were taken into account, and children with a haemoglobin  
 19 concentration less than 10 grams per decilitre were considered as having at least moderate anaemia.

Deleted: These o

Deleted: is

Deleted: is

Deleted: are

Deleted: 11

Deleted: are

**Exposure and Covariates**

20 In this study we classify the covariates into four different categories: child characteristics, maternal  
 21 characteristics, paternal characteristics and finally household and social factors. The child characteristics are child sex,  
 22 singleton or multiple births, and the age of child in months. The covariate for the age of child is not included in the infant



mortality model (which depends only on survival to age one year) but is included in all other models. Child age in months is categorized into four groups: 12-23, 24-35, 36-47, and 48-60.

The maternal factors that we include in this study are mother's age, her height, and her educational attainment.

Our exposure of interest is mother's age at the first birth. [The age of the mother at first birth is a variable reported in the Demographic and Health Surveys recode manual<sup>30</sup> and is calculated as from the CMC \(century month code\) of the date of the first birth and the CMC of the date of birth of the mother.](#) Age is categorized into three-year intervals: ages 12-14, 15-17, 18-20, 21-23, 24-26, 27-29, 30-32 and 33-35. [Appendix Table A2 shows the effect of age of the mother at first birth, and age squared, are regressed on the child health outcomes. This non-linear, continuous age variable, model shows that the poor child health outcomes are minimised at age 29 for the infant mortality outcome. However, a quadratic in age may not capture all the potential heterogeneity in the effect of maternal age on child health outcomes.](#) Furthermore, we use age grouped into three year intervals, as opposed to single year age groups, due to the small number of infant deaths occurring for single age groups. Grouping three years together provides a sufficient group size to minimize random fluctuations in mortality rates. Not all surveys measure women's height. In our main results, we do not control for height but, since maternal height has been shown to be a predictor of child health,<sup>34</sup> we do perform a sensitivity analysis where we see the effect of adding maternal height as a covariate and restrict the sample to observations where mother's height is available. The height of the mother is in five categories: 100-144cm, 145-149cm, 150-154cm, 155-159cm and 160-200cm. Maternal education is classified into three categories: no education or less than completed primary, completed primary, and completed secondary or higher. Paternal covariates are whether the women has a partner and if so the partner's age and education level. Partners are typically older than the women are and partner's age is split into six categories: 12-17, 18-23, 24-29, 30-35, 36-41, 42-59. Partner's education follows the same groupings as coded for mother's education: no education or less than completed primary, completed primary, and completed secondary or higher.

Household and social factors include the wealth quintile of the household and whether the household is in a rural or an urban location. The wealth quintile is a within-country measure of the wealth of the household relative to other households in that survey based on its ownership of household assets. [This measure of wealth, generated by Filmer and Pritchett,<sup>35</sup> is a linear index of asset ownership indicators using principal component analysis to derive](#)

weights. This measure has been standardised by Measure DHS across most of the Demographic and Health Surveys and is widely used as a measure of relative wealth within a country. Given we have country fixed effects in the regression analyses, this wealth index is an indicator of how each household's wealth deviates from its own country's mean wealth. We also include indicators for piped water to the house, and a flush toilet in household. In addition to these household measures, we include a cluster level measure: the percentage of living children aged 12-60 months who have received measles vaccination in the cluster. We do not have vaccination data for children who have died and the cluster level measles vaccination percentage allows us to control for neighbourhood health system inputs. The cluster level average may be subject to the ecological fallacy, and we do not claim to measure the causal effect of measles vaccination on vaccinated children. Measles vaccine is administered between 9-12 months of age and is likely to have only a limited direct effect on infant mortality (deaths between 0-12 months). Rather, we think of the vaccine coverage as being a proxy for health care provision, though there may also be a herd-immunity effect on younger children due to lower overall prevalence.

### Statistical Analysis

To measure the relative risk of a given outcome we ~~apply~~ modified Poisson regression following Zou's<sup>36</sup> methodology. We estimate the unadjusted model only controlling for country fixed effects and survey-year dummies to account for the uneven repeated cross section. We then estimate the adjusted model and include the covariates. While summary statistics are weighted to take into account the multistage sampling design, the regressions are not weighted.<sup>37</sup>

Deleted: applied

### Results

#### Results: Summary Statistics

Average age at first birth across the 118 Demographic and Health Surveys is 20.18. This ranges from an average age of 17.65 in Bangladesh in 1996, to an average of 23.02 in Jordan in 2007 (Table 1). Across the 118 surveys included in this study, infant mortality is as high as 17.01% of all first borns in Mali in 1995. In 30 of the 118 surveys, average stunting is 50% or higher, 79 of the 118 survey country/years have stunting rates of 30% or higher. Madagascar in 1997

1 has the highest average stunting rate with 65.46% of the first borns being classified as stunted according to the WHO  
2 standards. Wasting, weight-for-height, does not measure as prevalent as stunting. 26 of the 118 surveys record an  
3 average prevalence of 10% or more. Underweight, weight-for-age, is as high as 50.01% in Niger in 1998. In terms of  
4 underweight, 32 of the 118 surveys record a prevalence of 25% or more. An average of 36.91% of first borns in Niger in  
5 1998 is reported to have suffered diarrhoea within the two weeks prior to the DHS interview, but across the 118 surveys  
6 the average is 13.64%. Anaemia was not recorded in all of the surveys, but of the 38 surveys that do record anaemia  
7 the average rates range from a low of 7.99% of first borns in Egypt in 2000, to 71.55% in Burkina Faso in 2003. The average  
8 is 32.6% across the 118 surveys (Table 1).

14 In the infant mortality model (n=176,583 children) 23.9% of the women are between the ages of 15 and 17 at  
15 first birth and 35.2% are between the ages of 18 and 20 (Table 2). The reference group in the regression analysis is  
16 children whose mothers were 27-29 year old at first birth. This group represents 4.3% of the population with 7,648  
17 children. Children of multiple births are rare (0.8%), most women (92.9%) have partners, 60.1% of the children are born  
18 in rural areas, 43.6% have piped water to the house, the remainder has to leave the house to collect water, and 30.9% of  
19 the children have a flush toilet at the house. Distributions of covariates are similar across the different outcome models  
20 (Table 2).

27 In **Figure 1** we plot the prevalence of the child health outcome against the age of the mother at first birth. The  
28 weighted fraction of child health outcomes by age is an extension of the statistics reported in **Table 2** of child health  
29 outcomes by age band. We see that, in general, the prevalence of poor child health outcomes declines with mother's  
30 age to about age 27. The decline in poor child health outcomes with maternal age is particularly obvious for stunting,  
31 anaemia, and underweight, but is also evident for diarrhoea, infant mortality and wasting.

Deleted: aged

Deleted: were

Deleted: ¶

Table 1: Weighted Mean Child Health Outcomes and Confidence Intervals by Survey

|                      | Survey Year | Sample Size | Age at first birth |        | Infant Mortality |               | Stunting |               | Wasting |               | Underweight |               | Diarrhea |               | Anemia |               |
|----------------------|-------------|-------------|--------------------|--------|------------------|---------------|----------|---------------|---------|---------------|-------------|---------------|----------|---------------|--------|---------------|
|                      |             |             | N                  | Mean   | SD               | Mean          | 95% CI   | Mean          | 95% CI  | Mean          | 95% CI      | Mean          | 95% CI   | Mean          | 95% CI | Mean          |
| Armenia              | 2000        | 510         | 21.04              | (3.61) | 1.51             | [0.77,2.93]   | 16.17    | [12.27,21.00] | 1.40    | [0.55,3.56]   | 1.02        | [0.38,2.65]   | 8.53     | [6.20,11.63]  | 8.29   | [5.92,11.49]  |
| Armenia              | 2005        | 504         | 21.90              | (3.15) | 1.47             | [0.51,4.15]   | 17.19    | [11.07,25.72] | 3.12    | [1.63,5.88]   | 3.57        | [1.96,6.41]   | 15.60    | [12.00,20.05] | 15.78  | [10.21,23.57] |
| Azerbaijan           | 2006        | 719         | 22.54              | (3.97) | 3.11             | [1.73,5.55]   | 25.32    | [20.80,30.45] | 3.93    | [2.31,6.61]   | 7.40        | [4.81,11.21]  | 9.79     | [7.00,13.53]  | 17.82  | [13.55,23.07] |
| Bangladesh           | 1996        | 1,309       | 17.65              | (3.24) | 9.60             | [8.11,11.33]  | 57.25    | [53.52,60.89] | 16.80   | [14.37,19.53] | 48.81       | [45.41,52.22] | 8.13     | [6.43,10.23]  |        |               |
| Bangladesh           | 1999        | 1,596       | 18.20              | (3.49) | 9.86             | [8.45,11.48]  | 56.07    | [52.65,59.44] | 10.46   | [8.69,12.53]  | 40.37       | [37.31,43.51] | 6.30     | [5.04,7.85]   |        |               |
| Bangladesh           | 2004        | 1,633       | 18.04              | (3.29) | 7.80             | [6.49,9.35]   | 52.60    | [49.58,55.60] | 14.43   | [12.29,16.87] | 42.73       | [39.70,45.81] | 5.89     | [4.70,7.37]   |        |               |
| Bangladesh           | 2007        | 1,637       | 18.48              | (3.35) | 6.14             | [4.82,7.79]   | 43.55    | [40.14,47.01] | 15.12   | [12.90,17.64] | 40.91       | [37.40,44.52] | 9.98     | [8.24,12.03]  |        |               |
| Benin                | 1996        | 594         | 19.57              | (3.02) | 8.40             | [6.46,10.86]  | 38.94    | [32.70,45.58] | 14.76   | [10.67,20.08] | 27.60       | [22.44,33.45] | 27.46    | [21.91,33.80] |        |               |
| Benin                | 2001        | 781         | 20.25              | (3.55) | 8.27             | [6.49,10.48]  | 40.96    | [36.75,45.31] | 7.25    | [5.53,9.46]   | 21.17       | [17.80,24.99] | 14.54    | [11.70,17.92] | 55.57  | [49.74,61.26] |
| Benin                | 2006        | 2,112       | 20.42              | (3.57) | 7.34             | [6.23,8.63]   | 45.43    | [42.40,48.48] | 5.43    | [4.25,6.91]   | 17.54       | [15.58,19.69] | 9.41     | [8.06,10.95]  | 48.72  | [44.21,53.26] |
| Bolivia              | 1993        | 813         | 20.82              | (4.05) | 3.36             | [2.29,4.90]   | 29.95    | [25.21,35.16] | 4.17    | [2.47,6.96]   | 10.60       | [7.75,14.34]  | 31.69    | [27.25,36.50] |        |               |
| Bolivia              | 1998        | 1,224       | 20.85              | (4.16) | 4.54             | [3.42,6.00]   | 24.24    | [21.38,27.35] | 0.56    | [0.24,1.32]   | 3.43        | [2.47,4.73]   | 18.66    | [16.17,21.44] |        |               |
| Bolivia              | 2003        | 1,987       | 20.48              | (4.03) | 3.65             | [2.75,4.83]   | 26.30    | [23.44,29.38] | 0.81    | [0.48,1.39]   | 2.68        | [1.94,3.69]   | 22.07    | [19.78,24.53] | 22.67  | [18.54,27.40] |
| Brazil               | 1996        | 1,280       | 21.12              | (4.53) | 2.15             | [1.48,3.13]   | 8.76     | [7.11,10.73]  | 2.43    | [1.48,3.96]   | 2.60        | [1.76,3.82]   | 9.62     | [7.96,11.58]  |        |               |
| Burkina Faso         | 1992        | 771         | 19.12              | (2.91) | 12.50            | [10.06,15.44] | 45.86    | [41.34,50.46] | 15.69   | [12.40,19.66] | 33.99       | [29.51,38.78] | 12.85    | [10.33,15.87] |        |               |
| Burkina Faso         | 1998        | 730         | 19.21              | (3.00) | 14.94            | [12.25,18.09] | 53.12    | [48.15,58.03] | 13.36   | [10.62,16.67] | 39.39       | [35.29,43.64] | 12.64    | [10.02,15.83] |        |               |
| Burkina Faso         | 2003        | 1,414       | 19.19              | (2.87) | 9.07             | [7.48,10.95]  | 48.54    | [44.36,52.74] | 17.97   | [15.29,21.00] | 33.47       | [29.58,37.60] | 20.82    | [17.94,24.02] | 71.55  | [65.66,76.78] |
| Cameroon             | 1991        | 498         | 18.62              | (3.16) | 6.67             | [4.50,9.78]   | 35.90    | [29.95,42.33] | 4.38    | [2.41,7.86]   | 16.73       | [11.94,22.96] | 12.10    | [8.78,16.45]  |        |               |
| Cameroon             | 1998        | 542         | 18.87              | (3.18) | 7.27             | [5.29,9.91]   | 43.56    | [37.05,50.30] | 4.52    | [2.21,9.03]   | 17.92       | [12.98,24.22] | 20.23    | [15.66,25.74] |        |               |
| Cameroon             | 2004        | 1,146       | 19.13              | (3.45) | 6.26             | [4.90,7.97]   | 35.95    | [31.39,40.79] | 6.20    | [4.23,9.00]   | 13.57       | [10.26,17.73] | 16.99    | [13.40,21.29] | 45.37  | [40.19,50.65] |
| Central African Rep. | 1994        | 653         | 18.78              | (3.44) | 13.62            | [11.25,16.41] | 49.09    | [43.70,54.50] | 7.51    | [4.83,11.48]  | 22.06       | [17.35,27.62] | 28.00    | [23.40,33.12] |        |               |
| Chad                 | 1996        | 1,030       | 18.30              | (2.98) | 12.37            | [10.37,14.70] | 50.36    | [46.24,54.47] | 13.68   | [11.22,16.58] | 33.95       | [30.05,38.08] | 21.38    | [18.25,24.89] |        |               |
| Chad                 | 2004        | 733         | 18.18              | (3.09) | 14.00            | [10.86,17.85] | 42.26    | [37.35,47.34] | 11.23   | [8.51,14.68]  | 36.86       | [29.66,44.69] | 22.83    | [18.16,28.29] |        |               |
| Colombia             | 1995        | 1,405       | 21.60              | (4.43) | 1.58             | [1.05,2.38]   | 15.73    | [13.68,18.01] | 0.92    | [0.50,1.68]   | 4.54        | [3.42,6.01]   | 12.44    | [10.75,14.35] |        |               |
| Colombia             | 2000        | 1,358       | 21.32              | (4.70) | 1.85             | [1.26,2.70]   | 15.38    | [13.06,18.03] | 0.49    | [0.22,1.09]   | 3.19        | [2.21,4.59]   | 12.77    | [10.94,14.85] |        |               |
| Colombia             | 2004        | 3,998       | 20.70              | (4.49) | 1.04             | [0.75,1.44]   | 12.36    | [10.92,13.96] | 0.85    | [0.59,1.24]   | 3.15        | [2.50,3.98]   | 14.14    | [12.63,15.79] |        |               |
| Comoros              | 1996        | 234         | 21.20              | (4.42) | 6.84             | [4.40,10.47]  | 47.27    | [37.21,57.56] | 10.81   | [6.25,18.05]  | 19.64       | [12.36,29.77] | 16.81    | [10.75,25.30] |        |               |
| Congo, Dem. Rep.     | 2007        | 1,180       | 19.86              | (3.50) | 9.97             | [7.87,12.55]  | 45.30    | [38.16,52.65] | 8.54    | [5.39,13.26]  | 25.79       | [21.49,30.61] | 17.11    | [12.48,23.00] | 45.44  | [38.80,52.25] |
| Congo, Rep.          | 2005        | 940         | 19.66              | (3.63) | 8.85             | [6.69,11.63]  | 36.58    | [31.42,42.07] | 5.64    | [3.85,8.20]   | 12.69       | [9.38,16.94]  | 13.49    | [10.72,16.84] | 34.19  | [27.82,41.19] |
| Cote d'Ivoire        | 1994        | 927         | 18.28              | (3.21) | 11.83            | [9.50,14.63]  | 45.40    | [40.31,50.60] | 8.55    | [6.03,12.00]  | 24.23       | [19.89,29.17] | 17.89    | [14.34,22.10] |        |               |
| Cote d'Ivoire        | 1998        | 96          | 18.50              | (3.18) | 6.75             | [2.85,15.16]  | 36.39    | [23.85,51.09] | 4.53    | [1.49,12.96]  | 17.29       | [10.34,27.47] | 20.92    | [13.39,31.16] |        |               |
| Dominican Republic   | 1996        | 1,035       | 20.31              | (4.34) | 3.42             | [2.35,4.97]   | 8.21     | [6.30,10.65]  | 1.79    | [0.88,3.60]   | 2.85        | [1.85,4.38]   | 10.81    | [8.59,13.51]  |        |               |
| Dominican Republic   | 2002        | 2,611       | 19.99              | (4.19) | 2.00             | [1.41,2.84]   | 8.13     | [6.56,10.04]  | 1.11    | [0.66,1.86]   | 2.35        | [1.66,3.31]   | 13.91    | [12.04,16.02] |        |               |
| Dominican Republic   | 2007        | 2,632       | 20.14              | (4.29) | 2.00             | [1.38,2.88]   | 7.59     | [6.03,9.52]   | 1.40    | [0.93,2.10]   | 2.67        | [1.68,4.20]   | 14.66    | [12.74,16.82] |        |               |
| Dominican Republic   | 2007        | 164         | 18.72              | (3.27) | 1.99             | [0.58,6.52]   | 15.18    | [9.25,23.93]  | 1.08    | [0.27,4.28]   | 4.03        | [1.85,8.55]   | 22.09    | [15.04,31.24] |        |               |
| Egypt, Arab Rep.     | 1995        | 2,136       | 21.41              | (3.95) | 4.92             | [3.94,6.14]   | 30.90    | [27.95,34.01] | 3.67    | [2.70,4.97]   | 7.48        | [6.11,9.11]   | 13.87    | [12.04,15.93] |        |               |
| Egypt, Arab Rep.     | 2000        | 2,370       | 21.81              | (3.73) | 3.20             | [2.55,3.99]   | 21.40    | [19.35,23.61] | 2.19    | [1.58,3.03]   | 2.40        | [1.82,3.17]   | 5.85     | [4.88,7.00]   | 7.99   | [6.40,9.94]   |
| Egypt, Arab Rep.     | 2003        | 1,502       | 21.45              | (3.70) | 3.94             | [3.01,5.16]   | 16.87    | [14.65,19.36] | 4.17    | [3.03,5.72]   | 7.18        | [5.75,8.93]   | 19.40    | [17.10,21.92] |        |               |

|    |                  |      |        |       |        |       |               |       |               |       |               |       |               |       |               |       |               |
|----|------------------|------|--------|-------|--------|-------|---------------|-------|---------------|-------|---------------|-------|---------------|-------|---------------|-------|---------------|
| 1  | Egypt, Arab Rep. | 2005 | 3,226  | 21.78 | (3.69) | 2.53  | [1.99,3.21]   | 19.10 | [17.35,20.97] | 4.15  | [3.29,5.23]   | 3.39  | [2.72,4.21]   | 16.20 | [14.67,17.86] | 20.08 | [17.18,23.32] |
| 2  | Egypt, Arab Rep. | 2008 | 2,618  | 21.91 | (3.72) | 1.88  | [1.41,2.51]   | 30.29 | [28.01,32.67] | 7.28  | [6.05,8.73]   | 5.26  | [4.31,6.39]   | 6.63  | [5.66,7.74]   |       |               |
| 3  | Ethiopia         | 2000 | 1,689  | 20.09 | (3.64) | 11.37 | [9.40,13.70]  | 58.70 | [54.76,62.53] | 9.29  | [7.17,11.95]  | 37.03 | [33.21,41.03] | 22.00 | [18.84,25.53] |       |               |
| 4  | Ethiopia         | 2005 | 1,206  | 19.55 | (3.63) | 7.59  | [5.67,10.08]  | 48.86 | [42.72,55.04] | 10.38 | [7.47,14.26]  | 33.03 | [27.97,38.53] | 15.79 | [12.11,20.34] | 28.82 | [23.44,34.88] |
| 5  | Gabon            | 2000 | 709    | 18.31 | (3.21) | 5.10  | [3.60,7.19]   | 30.15 | [25.72,34.99] | 2.40  | [1.31,4.34]   | 7.57  | [5.60,10.16]  | 21.01 | [17.52,24.98] |       |               |
| 6  | Ghana            | 1993 | 427    | 20.45 | (3.51) | 3.04  | [1.75,5.24]   | 42.36 | [35.78,49.22] | 8.70  | [5.69,13.07]  | 20.09 | [15.52,25.58] | 14.10 | [10.22,19.15] |       |               |
| 7  | Ghana            | 1998 | 531    | 20.72 | (3.52) | 4.76  | [3.22,6.96]   | 33.92 | [29.21,38.98] | 7.52  | [5.46,10.26]  | 20.99 | [17.56,24.88] | 16.21 | [13.12,19.86] |       |               |
| 8  | Ghana            | 2003 | 492    | 20.92 | (3.71) | 5.81  | [4.03,8.31]   | 36.27 | [31.08,41.79] | 6.36  | [4.35,9.21]   | 19.35 | [15.61,23.73] | 15.96 | [12.40,20.29] | 52.42 | [46.87,57.91] |
| 9  | Ghana            | 2008 | 499    | 21.19 | (4.19) | 4.51  | [3.05,6.63]   | 35.08 | [29.58,41.00] | 6.80  | [4.47,10.21]  | 14.88 | [11.24,19.44] | 20.50 | [16.69,24.92] | 50.44 | [44.47,56.40] |
| 10 | Guatemala        | 1995 | 1,454  | 19.52 | (3.67) | 5.38  | [4.15,6.95]   | 50.10 | [45.63,54.57] | 3.90  | [2.75,5.52]   | 16.96 | [14.31,20.00] | 21.36 | [18.19,24.92] |       |               |
| 11 | Guinea           | 1999 | 743    | 18.32 | (3.36) | 10.82 | [8.73,13.35]  | 37.23 | [32.89,41.79] | 6.31  | [4.47,8.83]   | 19.86 | [16.59,23.58] | 22.56 | [19.45,26.00] |       |               |
| 12 | Guinea           | 2005 | 666    | 18.77 | (3.72) | 7.40  | [5.59,9.74]   | 43.81 | [37.73,50.09] | 10.06 | [6.85,14.54]  | 26.52 | [21.40,32.36] | 17.18 | [13.55,21.53] | 58.57 | [52.14,64.73] |
| 13 | Haiti            | 1994 | 514    | 21.19 | (4.18) | 9.24  | [6.84,12.39]  | 33.89 | [28.47,39.78] | 5.65  | [3.83,8.26]   | 20.68 | [16.67,25.36] | 24.12 | [19.99,28.80] |       |               |
| 14 | Haiti            | 2005 | 1,000  | 21.19 | (4.44) | 5.52  | [4.09,7.41]   | 23.71 | [19.13,29.00] | 9.22  | [6.50,12.92]  | 16.45 | [12.85,20.82] | 17.80 | [13.50,23.12] | 34.56 | [29.27,40.26] |
| 15 | Honduras         | 2005 | 2,390  | 19.70 | (3.82) | 1.68  | [1.22,2.32]   | 23.09 | [20.90,25.43] | 1.26  | [0.80,1.96]   | 6.73  | [5.55,8.13]   | 15.76 | [14.10,17.57] | 12.30 | [10.69,14.12] |
| 16 | India            | 1992 | 12,919 | 19.93 | (3.55) | 8.02  | [7.44,8.64]   | 58.80 | [56.94,60.63] | 18.02 | [16.66,19.47] | 48.55 | [46.72,50.37] | 5.34  | [4.79,5.95]   |       |               |
| 17 | India            | 1998 | 12,763 | 20.12 | (3.66) | 7.11  | [6.58,7.68]   | 52.52 | [50.67,54.36] | 15.99 | [14.77,17.29] | 41.41 | [39.66,43.18] | 17.38 | [16.22,18.61] |       |               |
| 18 | India            | 2005 | 13,112 | 21.13 | (3.86) | 6.27  | [5.71,6.87]   | 44.60 | [43.17,46.04] | 16.23 | [15.25,17.26] | 38.76 | [37.35,40.18] | 7.60  | [6.97,8.30]   | 38.38 | [36.96,39.81] |
| 19 | Jordan           | 1990 | 1,035  | 21.22 | (3.59) | 1.90  | [1.18,3.02]   | 18.53 | [15.85,21.55] | 3.05  | [1.97,4.70]   | 4.97  | [3.45,7.11]   | 9.21  | [7.48,11.29]  |       |               |
| 20 | Jordan           | 1997 | 1,074  | 22.17 | (3.73) | 2.98  | [2.11,4.20]   | 8.55  | [6.88,10.59]  | 1.60  | [0.94,2.71]   | 2.92  | [2.05,4.14]   | 15.63 | [13.37,18.19] |       |               |
| 21 | Jordan           | 2007 | 898    | 23.02 | (3.90) | 1.83  | [0.77,4.30]   | 12.20 | [9.05,16.26]  | 5.89  | [3.66,9.35]   | 5.23  | [3.55,7.64]   | 16.98 | [13.21,21.55] | 12.29 | [9.25,16.16]  |
| 22 | Kazakhstan       | 1995 | 406    | 21.93 | (3.62) | 3.68  | [2.17,6.20]   | 17.89 | [11.91,25.99] | 2.59  | [1.07,6.14]   | 5.77  | [2.97,10.91]  | 17.56 | [11.77,25.39] |       |               |
| 23 | Kazakhstan       | 1999 | 395    | 21.99 | (3.69) | 4.48  | [2.69,7.38]   | 12.66 | [8.15,19.15]  | 2.56  | [0.97,6.54]   | 3.86  | [1.53,9.42]   | 17.49 | [13.32,22.63] |       |               |
| 24 | Kenya            | 1998 | 867    | 19.92 | (3.20) | 3.95  | [2.71,5.71]   | 38.01 | [33.54,42.69] | 5.98  | [3.97,8.90]   | 14.11 | [11.53,17.14] | 18.73 | [14.95,23.21] |       |               |
| 25 | Kenya            | 2003 | 1,114  | 19.95 | (3.43) | 5.61  | [4.29,7.30]   | 35.33 | [31.70,39.14] | 5.42  | [3.87,7.54]   | 14.99 | [12.43,17.97] | 16.14 | [13.63,19.00] |       |               |
| 26 | Kenya            | 2008 | 1,059  | 19.91 | (3.60) | 4.75  | [3.34,6.71]   | 35.46 | [30.78,40.43] | 5.24  | [3.67,7.41]   | 14.39 | [11.36,18.06] | 13.55 | [10.69,17.02] |       |               |
| 27 | Kyrgyz Republic  | 1997 | 388    | 20.97 | (3.14) | 5.05  | [3.22,7.83]   | 32.43 | [24.30,41.77] | 2.02  | [0.73,5.49]   | 6.77  | [3.51,12.64]  | 19.38 | [14.01,26.20] |       |               |
| 28 | Lesotho          | 2004 | 749    | 19.81 | (3.24) | 6.82  | [5.09,9.09]   | 48.43 | [41.99,54.93] | 2.81  | [1.50,5.18]   | 16.97 | [13.00,21.84] | 13.53 | [9.92,18.19]  | 28.47 | [22.99,34.65] |
| 29 | Liberia          | 2006 | 940    | 19.38 | (3.52) | 7.12  | [5.23,9.63]   | 45.57 | [40.86,50.35] | 5.85  | [4.08,8.32]   | 25.72 | [20.96,31.13] | 21.03 | [17.16,25.50] |       |               |
| 30 | Madagascar       | 1997 | 915    | 19.22 | (3.94) | 10.61 | [8.51,13.14]  | 65.46 | [60.10,70.45] | 7.12  | [5.03,10.00]  | 34.37 | [29.41,39.70] | 29.95 | [25.50,34.81] |       |               |
| 31 | Madagascar       | 2003 | 951    | 20.19 | (4.40) | 5.36  | [3.70,7.69]   | 56.18 | [50.85,61.36] | 12.83 | [9.76,16.70]  | 37.42 | [32.05,43.13] | 7.33  | [5.31,10.05]  | 34.48 | [26.54,43.39] |
| 32 | Madagascar       | 2008 | 1,887  | 19.11 | (3.82) | 4.78  | [3.78,6.02]   | 44.72 | [40.11,49.42] |       |               |       |               | 9.11  | [6.96,11.84]  | 14.62 | [11.89,17.85] |
| 33 | Malawi           | 1992 | 564    | 18.84 | (2.98) | 17.00 | [13.63,20.98] | 64.28 | [58.09,70.03] | 6.08  | [3.88,9.41]   | 22.30 | [17.79,27.57] | 11.15 | [8.10,15.17]  |       |               |
| 34 | Malawi           | 2000 | 2,121  | 18.95 | (2.61) | 13.71 | [12.13,15.46] | 62.66 | [59.57,65.66] | 4.79  | [3.64,6.27]   | 22.42 | [19.99,25.05] | 16.49 | [14.48,18.71] |       |               |
| 35 | Malawi           | 2004 | 1,872  | 18.80 | (2.53) | 8.53  | [7.15,10.15]  | 58.00 | [54.61,61.31] | 5.87  | [4.55,7.55]   | 18.31 | [15.91,20.98] | 21.50 | [18.90,24.34] | 39.83 | [34.10,45.84] |
| 36 | Mali             | 1995 | 1,042  | 18.48 | (3.32) | 17.01 | [14.74,19.55] | 48.29 | [42.85,53.77] | 23.45 | [19.14,28.41] | 39.96 | [34.73,45.43] | 25.17 | [20.64,30.32] |       |               |
| 37 | Mali             | 2001 | 1,595  | 18.70 | (3.44) | 15.56 | [13.36,18.04] | 45.95 | [42.17,49.77] | 12.23 | [9.96,14.94]  | 33.63 | [30.07,37.38] | 19.06 | [15.93,22.64] | 63.91 | [56.77,70.49] |
| 38 | Mali             | 2006 | 1,844  | 18.55 | (3.43) | 14.17 | [11.74,17.01] | 42.24 | [38.58,45.99] | 14.98 | [12.97,17.24] | 31.23 | [28.23,34.40] | 14.47 | [12.11,17.20] | 62.99 | [57.58,68.08] |
| 39 | Moldova          | 2005 | 630    | 22.18 | (3.56) | 0.93  | [0.40,2.15]   | 8.89  | [6.70,11.70]  | 5.19  | [3.59,7.44]   | 3.22  | [1.95,5.26]   | 7.01  | [5.28,9.26]   | 9.04  | [6.38,12.66]  |
| 40 | Morocco          | 1992 | 788    | 22.21 | (4.38) | 6.22  | [4.55,8.45]   | 23.49 | [20.13,27.23] | 1.94  | [1.10,3.41]   | 4.29  | [2.86,6.39]   | 6.20  | [4.48,8.53]   |       |               |
| 41 | Morocco          | 2003 | 1,276  | 22.57 | (4.54) | 3.96  | [3.00,5.21]   | 19.72 | [17.10,22.64] | 8.67  | [7.00,10.70]  | 8.32  | [6.80,10.15]  | 7.30  | [5.72,9.26]   |       |               |
| 42 | Mozambique       | 1997 | 938    | 18.80 | (3.27) | 14.62 | [10.35,20.26] | 56.14 | [48.14,63.83] | 9.74  | [6.09,15.20]  | 28.54 | [20.40,38.36] | 22.39 | [14.69,32.59] |       |               |
| 43 | Mozambique       | 2003 | 1,679  | 18.73 | (3.26) | 11.68 | [9.88,13.75]  | 51.77 | [47.94,55.58] | 4.75  | [3.40,6.60]   | 21.41 | [18.50,24.65] | 14.41 | [12.22,16.91] |       |               |
| 44 | Namibia          | 1992 | 762    | 20.32 | (3.71) | 5.10  | [3.75,6.89]   | 38.83 | [34.12,43.76] | 8.02  | [5.73,11.13]  | 21.24 | [17.21,25.91] | 16.28 | [12.91,20.33] |       |               |
| 45 | Namibia          | 2000 | 830    | 20.44 | (3.83) | 3.05  | [1.95,4.72]   | 27.82 | [23.92,32.10] | 8.74  | [6.18,12.22]  | 18.69 | [14.28,24.08] | 12.63 | [9.55,16.53]  |       |               |
| 46 | Namibia          | 2006 | 1,123  | 20.76 | (4.00) | 3.31  | [2.44,4.50]   | 28.69 | [24.81,32.90] | 5.96  | [4.41,8.02]   | 17.92 | [14.58,21.84] | 16.00 | [12.96,19.59] |       |               |

|    |              |      |         |       |        |       |               |       |               |       |               |       |               |       |               |       |               |
|----|--------------|------|---------|-------|--------|-------|---------------|-------|---------------|-------|---------------|-------|---------------|-------|---------------|-------|---------------|
| 1  | Nicaragua    | 1997 | 1,633   | 19.06 | (3.64) | 3.75  | [2.86,4.90]   | 25.74 | [23.01,28.66] | 2.18  | [1.39,3.40]   | 8.07  | [6.33,10.23]  | 12.33 | [10.57,14.34] |       |               |
| 2  | Nicaragua    | 2001 | 1,663   | 19.26 | (3.75) | 2.43  | [1.78,3.30]   | 20.84 | [18.42,23.48] | 1.59  | [0.88,2.85]   | 5.03  | [3.84,6.56]   | 12.33 | [10.48,14.45] |       |               |
| 3  | Niger        | 1998 | 871     | 18.16 | (3.15) | 16.42 | [13.68,19.58] | 56.49 | [50.91,61.91] | 24.52 | [19.95,29.75] | 50.01 | [44.60,55.42] | 36.91 | [31.70,42.44] |       |               |
| 4  | Niger        | 2006 | 922     | 18.64 | (3.42) | 9.45  | [7.42,11.96]  | 60.64 | [55.35,65.69] | 9.47  | [6.85,12.95]  | 45.40 | [40.09,50.81] | 18.74 | [14.93,23.26] | 59.43 | [53.08,65.49] |
| 5  | Nigeria      | 1990 | 1,023   | 19.80 | (3.88) | 7.65  | [5.64,10.30]  | 55.63 | [51.25,59.92] | 13.60 | [8.01,22.17]  | 38.01 | [32.01,44.40] | 10.97 | [8.23,14.47]  |       |               |
| 6  | Nigeria      | 2003 | 850     | 19.82 | (3.89) | 10.00 | [7.71,12.87]  | 46.78 | [40.28,53.39] | 9.13  | [6.60,12.50]  | 31.67 | [26.27,37.61] | 16.72 | [13.26,20.87] |       |               |
| 7  | Nigeria      | 2008 | 3,952   | 20.29 | (4.24) | 8.17  | [7.26,9.19]   | 39.08 | [36.76,41.46] | 12.00 | [10.61,13.53] | 24.74 | [22.65,26.96] | 10.41 | [9.20,11.77]  |       |               |
| 8  | Pakistan     | 1990 | 874     | 20.81 | (3.88) | 9.97  | [7.64,12.90]  | 53.38 | [47.78,58.89] | 11.52 | [7.41,17.49]  | 33.03 | [27.96,38.54] | 7.11  | [4.90,10.21]  |       |               |
| 9  | Paraguay     | 1990 | 696     | 21.07 | (4.21) | 3.09  | [2.02,4.69]   | 12.87 | [10.24,16.06] | 0.34  | [0.07,1.55]   | 1.83  | [0.98,3.38]   | 4.93  | [3.27,7.35]   |       |               |
| 10 | Peru         | 1991 | 1,747   | 21.13 | (4.22) | 2.50  | [1.87,3.35]   | 30.63 | [27.83,33.57] | 1.21  | [0.73,1.99]   | 6.08  | [4.88,7.56]   | 7.93  | [6.57,9.55]   |       |               |
| 11 | Peru         | 1996 | 3,505   | 20.96 | (4.15) | 3.05  | [2.45,3.80]   | 22.42 | [20.35,24.65] | 0.79  | [0.51,1.22]   | 3.17  | [2.59,3.88]   | 15.06 | [13.51,16.75] |       |               |
| 12 | Peru         | 2000 | 3,151   | 21.02 | (4.33) | 2.21  | [1.70,2.87]   | 24.09 | [21.85,26.48] | 0.68  | [0.41,1.13]   | 3.20  | [2.50,4.08]   | 13.78 | [12.30,15.41] | 24.96 | [20.76,29.70] |
| 13 | Peru         | 2003 | 2,856   | 21.14 | (4.44) | 1.57  | [1.11,2.24]   | 20.19 | [17.77,22.84] | 0.71  | [0.35,1.43]   | 2.24  | [1.70,2.94]   | 13.72 | [11.85,15.82] | 17.32 | [15.22,19.64] |
| 14 | Rwanda       | 1992 | 742     | 21.54 | (3.57) | 10.06 | [8.07,12.48]  | 58.42 | [53.98,62.73] | 2.91  | [1.75,4.82]   | 19.17 | [15.79,23.07] | 15.52 | [12.61,18.96] |       |               |
| 15 | Rwanda       | 2000 | 1,209   | 21.34 | (3.32) | 10.62 | [8.96,12.54]  | 52.92 | [49.11,56.70] | 5.24  | [3.73,7.30]   | 17.46 | [14.78,20.52] | 15.93 | [13.40,18.84] |       |               |
| 16 | Rwanda       | 2005 | 979     | 21.54 | (3.29) | 8.06  | [6.31,10.25]  | 54.14 | [49.11,59.09] | 5.69  | [3.72,8.59]   | 21.00 | [17.07,25.56] | 16.34 | [12.97,20.38] | 35.70 | [30.54,41.20] |
| 17 | Senegal      | 2005 | 1,260   | 20.01 | (3.91) | 7.09  | [5.61,8.93]   | 20.13 | [15.29,26.04] | 7.46  | [5.05,10.88]  | 13.98 | [10.29,18.71] | 21.26 | [16.65,26.74] | 61.98 | [55.64,67.94] |
| 18 | Sierra Leone | 2008 | 663     | 19.85 | (4.03) | 8.06  | [6.08,10.61]  | 38.25 | [31.56,45.41] | 11.82 | [8.30,16.57]  | 22.17 | [16.99,28.39] | 7.80  | [5.15,11.64]  | 46.22 | [39.35,53.23] |
| 19 | Swaziland    | 2006 | 620     | 19.48 | (3.35) | 7.95  | [5.95,10.55]  | 28.69 | [24.65,33.10] | 1.54  | [0.72,3.29]   | 3.87  | [2.40,6.16]   | 17.15 | [13.71,21.23] | 21.93 | [18.07,26.34] |
| 20 | Tanzania     | 1996 | 1,058   | 19.31 | (2.81) | 9.38  | [7.62,11.50]  | 56.50 | [52.22,60.69] | 8.52  | [6.43,11.20]  | 26.25 | [23.01,29.77] | 13.45 | [11.13,16.17] |       |               |
| 21 | Tanzania     | 1999 | 48      | 18.50 | (2.84) | 9.86  | [3.92,22.69]  | 57.16 | [33.20,78.17] | 6.31  | [1.43,23.83]  | 26.88 | [13.03,47.41] | 9.32  | [3.45,22.82]  |       |               |
| 22 | Tanzania     | 2004 | 1,405   | 19.58 | (3.26) | 7.40  | [5.98,9.12]   | 50.22 | [45.93,54.51] | 3.24  | [2.22,4.69]   | 18.11 | [15.72,20.77] | 11.54 | [9.57,13.85]  | 43.42 | [39.87,47.05] |
| 23 | Togo         | 1998 | 801     | 20.30 | (3.60) | 8.27  | [6.47,10.53]  | 34.67 | [29.09,40.70] | 12.53 | [9.28,16.70]  | 25.71 | [21.19,30.81] | 30.18 | [25.94,34.79] |       |               |
| 24 | Turkey       | 1993 | 949     | 21.16 | (3.44) | 4.73  | [3.47,6.42]   | 17.98 | [15.20,21.15] | 1.76  | [1.00,3.09]   | 6.15  | [4.49,8.37]   | 14.42 | [12.09,17.12] |       |               |
| 25 | Turkey       | 1998 | 929     | 21.59 | (3.89) | 3.06  | [2.05,4.55]   | 18.36 | [15.46,21.67] | 1.62  | [0.88,2.99]   | 5.70  | [4.12,7.85]   | 27.06 | [23.87,30.51] |       |               |
| 26 | Uganda       | 1995 | 1,067   | 18.71 | (2.98) | 11.14 | [9.18,13.47]  | 52.06 | [46.60,57.47] | 5.41  | [3.49,8.29]   | 23.09 | [19.11,27.61] | 25.44 | [22.03,29.17] |       |               |
| 27 | Uganda       | 2000 | 1,035   | 18.81 | (2.98) | 10.56 | [8.68,12.78]  | 49.28 | [45.02,53.56] | 3.10  | [1.94,4.93]   | 14.86 | [11.93,18.34] | 16.99 | [13.93,20.57] | 41.11 | [36.08,46.33] |
| 28 | Uganda       | 2006 | 711     | 19.26 | (2.82) | 7.63  | [5.55,10.39]  | 42.30 | [36.02,48.83] | 6.65  | [3.81,11.35]  | 15.90 | [11.62,21.39] | 26.83 | [21.31,33.17] | 41.20 | [34.42,48.33] |
| 29 | Uzbekistan   | 1996 | 559     | 20.89 | (2.71) | 3.80  | [2.51,5.71]   | 35.89 | [29.30,43.06] | 7.84  | [4.63,13.00]  | 7.63  | [4.98,11.53]  | 6.73  | [4.11,10.84]  |       |               |
| 30 | Zambia       | 1996 | 1,188   | 18.80 | (2.81) | 13.46 | [11.48,15.72] | 57.98 | [54.05,61.81] | 4.49  | [3.18,6.29]   | 21.31 | [18.40,24.55] | 24.12 | [21.17,27.34] |       |               |
| 31 | Zambia       | 2001 | 1,161   | 18.59 | (2.68) | 10.47 | [8.82,12.38]  | 58.17 | [54.17,62.06] | 5.27  | [3.70,7.44]   | 22.43 | [19.83,25.27] | 23.77 | [20.83,26.98] |       |               |
| 32 | Zambia       | 2007 | 972     | 19.21 | (3.12) | 7.44  | [5.85,9.42]   | 51.39 | [47.22,55.54] | 4.36  | [3.03,6.24]   | 15.44 | [12.74,18.59] | 15.66 | [12.98,18.78] |       |               |
| 33 | Zimbabwe     | 1994 | 719     | 19.53 | (3.01) | 5.81  | [4.22,7.95]   | 31.46 | [25.99,37.50] | 7.39  | [4.77,11.27]  | 14.70 | [10.79,19.72] | 25.59 | [20.64,31.26] |       |               |
| 34 | Zimbabwe     | 2005 | 1,261   | 19.87 | (3.19) | 5.49  | [4.08,7.35]   | 33.26 | [30.00,36.69] | 6.32  | [4.77,8.33]   | 12.57 | [10.49,14.98] | 13.65 | [11.40,16.26] | 29.68 | [25.99,33.65] |
| 35 | Total        | 2000 | 176,583 | 20.18 | (3.87) | 6.49  | [6.35,6.64]   | 36.20 | [35.81,36.60] | 7.53  | [7.32,7.74]   | 19.78 | [19.43,20.13] | 13.64 | [13.40,13.87] | 32.60 | [31.87,33.34] |

Table 2: Weighted Frequency and Distribution of First Born Children within Five Years of the Survey Aged 12-60 months Across Age of Mother at Birth and Other Covariates

|                                                                         | Infant Mortality |                   | Stunting   |                   | Underweight |                   | Wasting    |                   | Diarrhoea  |                   | Moderate Anaemia |                   |
|-------------------------------------------------------------------------|------------------|-------------------|------------|-------------------|-------------|-------------------|------------|-------------------|------------|-------------------|------------------|-------------------|
|                                                                         | Population       | Weighted Fraction | Population | Weighted Fraction | Population  | Weighted Fraction | Population | Weighted Fraction | Population | Weighted Fraction | Population       | Weighted Fraction |
|                                                                         | n=176,583        |                   | n=119,018  |                   | n=122,680   |                   | n=120,246  |                   | n=135,121  |                   | n=31,520         |                   |
| <b>Age Band of the Mother at First Birth</b>                            |                  |                   |            |                   |             |                   |            |                   |            |                   |                  |                   |
| 12-14                                                                   | 4,497            | 0.026             | 2,301      | 0.020             | 2443        | 0.020             | 2,379      | 0.020             | 2,851      | 0.021             | 514              | 0.016             |
| 15-17                                                                   | 42,233           | 0.239             | 25,882     | 0.219             | 26839       | 0.220             | 26,335     | 0.220             | 30,011     | 0.222             | 6,531            | 0.203             |
| 18-20                                                                   | 62,091           | 0.352             | 41,492     | 0.351             | 42868       | 0.352             | 42,054     | 0.352             | 47,425     | 0.351             | 11,753           | 0.366             |
| 21-23                                                                   | 37,757           | 0.214             | 26,427     | 0.224             | 27127       | 0.223             | 26,594     | 0.223             | 29,927     | 0.222             | 7,563            | 0.236             |
| 24-26                                                                   | 17,383           | 0.099             | 12,669     | 0.107             | 12936       | 0.106             | 12,690     | 0.106             | 14,258     | 0.106             | 3,355            | 0.105             |
| 27-29                                                                   | 7,648            | 0.043             | 5,722      | 0.048             | 5883        | 0.048             | 5,771      | 0.048             | 6,480      | 0.048             | 1,481            | 0.046             |
| 30-32                                                                   | 3,377            | 0.019             | 2,566      | 0.022             | 2616        | 0.022             | 2,547      | 0.021             | 2,884      | 0.021             | 650              | 0.020             |
| 33-35                                                                   | 1,399            | 0.008             | 1,075      | 0.009             | 1085        | 0.009             | 1,075      | 0.009             | 1,203      | 0.009             | 249              | 0.008             |
| <b>Sex of Child</b>                                                     |                  |                   |            |                   |             |                   |            |                   |            |                   |                  |                   |
| Male                                                                    | 90,302           | 0.512             | 59,709     | 0.505             | 61867       | 0.508             | 60,577     | 0.507             | 68,501     | 0.507             | 16,438           | 0.512             |
| Female                                                                  | 86,083           | 0.488             | 58,424     | 0.495             | 59929       | 0.492             | 58,867     | 0.493             | 66,539     | 0.493             | 15,658           | 0.488             |
| <b>Type of Birth</b>                                                    |                  |                   |            |                   |             |                   |            |                   |            |                   |                  |                   |
| Singleton                                                               | 174,947          | 0.992             | 117,235    | 0.992             | 120853      | 0.992             | 118,515    | 0.992             | 134,004    | 0.992             | 31,850           | 0.992             |
| Twin                                                                    | 1,438            | 0.008             | 898        | 0.008             | 944         | 0.008             | 930        | 0.008             | 1,036      | 0.008             | 247              | 0.008             |
| <b>Age of Child in Months</b>                                           |                  |                   |            |                   |             |                   |            |                   |            |                   |                  |                   |
| 48-60 months                                                            | 44,542           | 0.253             | 24,472     | 0.207             | 24780       | 0.203             | 24,353     | 0.204             | 27,013     | 0.200             | 7,552            | 0.235             |
| 36-47 months                                                            | 42,793           | 0.243             | 26,908     | 0.228             | 27694       | 0.227             | 27,210     | 0.228             | 31,330     | 0.232             | 7,867            | 0.245             |
| 24-35 months                                                            | 43,082           | 0.244             | 31,485     | 0.267             | 32603       | 0.268             | 31,950     | 0.267             | 36,595     | 0.271             | 7,961            | 0.248             |
| 12-23 months                                                            | 45,968           | 0.261             | 35,268     | 0.299             | 36718       | 0.301             | 35,932     | 0.301             | 40,101     | 0.297             | 8,717            | 0.272             |
| <b>Education Level of the Mother at Time of Interview</b>               |                  |                   |            |                   |             |                   |            |                   |            |                   |                  |                   |
| Secondary or higher                                                     | 36,152           | 0.205             | 27,729     | 0.235             | 28308       | 0.232             | 27,757     | 0.232             | 31,177     | 0.231             | 6,562            | 0.204             |
| Completed primary                                                       | 57,645           | 0.327             | 40,543     | 0.343             | 41341       | 0.339             | 40,673     | 0.341             | 45,720     | 0.339             | 12,739           | 0.397             |
| No education or incomplete primary                                      | 82,589           | 0.468             | 49,862     | 0.422             | 52147       | 0.428             | 51,015     | 0.427             | 58,142     | 0.431             | 12,796           | 0.399             |
| <b>Mother has a Partner</b>                                             |                  |                   |            |                   |             |                   |            |                   |            |                   |                  |                   |
| Yes                                                                     | 163,858          | 0.929             | 109,350    | 0.926             | 112890      | 0.927             | 110,666    | 0.927             | 125,468    | 0.929             | 30,192           | 0.941             |
| No                                                                      | 12,527           | 0.071             | 8,784      | 0.074             | 8906        | 0.073             | 8,779      | 0.074             | 9,572      | 0.071             | 1,904            | 0.059             |
| <b>Education Level of the Mother's Partner at the Time of Interview</b> |                  |                   |            |                   |             |                   |            |                   |            |                   |                  |                   |
| Completed Secondary or Higher                                           | 54,943           | 0.311             | 39,434     | 0.334             | 40422       | 0.332             | 39,640     | 0.332             | 44,409     | 0.329             | 8,891            | 0.277             |
| Completed primary                                                       | 56,655           | 0.321             | 38,884     | 0.329             | 39920       | 0.328             | 39,216     | 0.328             | 44,217     | 0.327             | 12,180           | 0.379             |
| No education or incomplete primary                                      | 64,787           | 0.367             | 39,815     | 0.337             | 41455       | 0.340             | 40,589     | 0.340             | 46,414     | 0.344             | 11,025           | 0.344             |

Age Band of the Mother's Partner at the Birth of the Mother's First Birth

|              |                |              |               |              |              |              |               |              |               |              |               |              |
|--------------|----------------|--------------|---------------|--------------|--------------|--------------|---------------|--------------|---------------|--------------|---------------|--------------|
| 12-17        | 2,104          | 0.012        | 1,224         | 0.010        | 1236         | 0.010        | 1,211         | 0.010        | 1,409         | 0.010        | 373           | 0.012        |
| 18-23        | 40,271         | 0.228        | 27,180        | 0.230        | 28018        | 0.230        | 27,483        | 0.230        | 30,594        | 0.227        | 9,132         | 0.285        |
| <b>24-29</b> | <b>101,722</b> | <b>0.577</b> | <b>66,806</b> | <b>0.566</b> | <b>68828</b> | <b>0.565</b> | <b>67,569</b> | <b>0.566</b> | <b>77,555</b> | <b>0.574</b> | <b>15,792</b> | <b>0.492</b> |
| 30-35        | 22,072         | 0.125        | 15,954        | 0.135        | 16483        | 0.135        | 16,125        | 0.135        | 17,661        | 0.131        | 4,797         | 0.149        |
| 36-41        | 6,768          | 0.038        | 4,685         | 0.040        | 4846         | 0.040        | 4,724         | 0.040        | 5,266         | 0.039        | 1,342         | 0.042        |
| 42-59        | 3,448          | 0.020        | 2,284         | 0.019        | 2385         | 0.020        | 2,332         | 0.020        | 2,555         | 0.019        | 660           | 0.021        |

Wealth Quintile of the Child's Household

|                |               |              |               |              |              |              |               |              |               |              |              |              |
|----------------|---------------|--------------|---------------|--------------|--------------|--------------|---------------|--------------|---------------|--------------|--------------|--------------|
| <b>Richest</b> | <b>36,825</b> | <b>0.209</b> | <b>24,886</b> | <b>0.211</b> | <b>25377</b> | <b>0.208</b> | <b>24,876</b> | <b>0.208</b> | <b>28,741</b> | <b>0.213</b> | <b>6,550</b> | <b>0.204</b> |
| Rich           | 37,749        | 0.214        | 25,955        | 0.220        | 26597        | 0.218        | 26,150        | 0.219        | 29,413        | 0.218        | 6,961        | 0.217        |
| Middle         | 36,203        | 0.205        | 24,554        | 0.208        | 25319        | 0.208        | 24,853        | 0.208        | 27,932        | 0.207        | 6,795        | 0.212        |
| Poorer         | 34,324        | 0.195        | 22,705        | 0.192        | 23517        | 0.193        | 23,053        | 0.193        | 25,834        | 0.191        | 6,138        | 0.191        |
| Poorest        | 31,285        | 0.177        | 20,035        | 0.170        | 20986        | 0.172        | 20,512        | 0.172        | 23,120        | 0.171        | 5,653        | 0.176        |

Residence of the Child's Household at the Time of Interview

|              |               |              |               |              |              |              |               |              |               |              |               |              |
|--------------|---------------|--------------|---------------|--------------|--------------|--------------|---------------|--------------|---------------|--------------|---------------|--------------|
| <b>Urban</b> | <b>70,395</b> | <b>0.399</b> | <b>50,428</b> | <b>0.427</b> | <b>51491</b> | <b>0.423</b> | <b>50,597</b> | <b>0.424</b> | <b>57,358</b> | <b>0.425</b> | <b>12,301</b> | <b>0.383</b> |
| Rural        | 105,990       | 0.601        | 67,706        | 0.573        | 70305        | 0.577        | 68,848        | 0.576        | 77,682        | 0.575        | 19,796        | 0.617        |

Water Piped to Child's House

|                          |               |              |               |              |              |              |               |              |               |              |               |              |
|--------------------------|---------------|--------------|---------------|--------------|--------------|--------------|---------------|--------------|---------------|--------------|---------------|--------------|
| <b>Piped to House</b>    | <b>76,844</b> | <b>0.436</b> | <b>55,481</b> | <b>0.470</b> | <b>56699</b> | <b>0.466</b> | <b>55,714</b> | <b>0.466</b> | <b>62,499</b> | <b>0.463</b> | <b>14,306</b> | <b>0.446</b> |
| Water not piped to house | 99,542        | 0.564        | 62,653        | 0.530        | 65097        | 0.534        | 63,731        | 0.534        | 72,542        | 0.537        | 17,790        | 0.554        |

Flush Toilet at Child's House

|                              |               |              |               |              |              |              |               |              |               |              |               |              |
|------------------------------|---------------|--------------|---------------|--------------|--------------|--------------|---------------|--------------|---------------|--------------|---------------|--------------|
| <b>Flush Toilet at House</b> | <b>54,418</b> | <b>0.309</b> | <b>41,542</b> | <b>0.352</b> | <b>42402</b> | <b>0.348</b> | <b>41,686</b> | <b>0.349</b> | <b>46,955</b> | <b>0.348</b> | <b>10,511</b> | <b>0.327</b> |
| No Flush Toilet at House     | 121,968       | 0.691        | 76,592        | 0.648        | 79394        | 0.652        | 77,759        | 0.651        | 88,085        | 0.652        | 21,586        | 0.673        |

Child Measles Vaccination

|                              |  |              |  |              |  |              |  |              |  |              |  |              |
|------------------------------|--|--------------|--|--------------|--|--------------|--|--------------|--|--------------|--|--------------|
| <b>Cluster Weighted Mean</b> |  | <b>0.234</b> |  | <b>0.204</b> |  | <b>0.208</b> |  | <b>0.208</b> |  | <b>0.214</b> |  | <b>0.211</b> |
|------------------------------|--|--------------|--|--------------|--|--------------|--|--------------|--|--------------|--|--------------|



Older women are more likely to have multiple births, although the event is rare across all age groups. Young mothers are less likely to have a partner: 8.6% of 15-17 year olds mothers do not have a partner compared to 5.8% of women in the 27-29 year old category (Table 3). Young mothers have lower education than older mothers; 64.6% of mothers aged 15-17 had incomplete primary or no schooling, whereas 23.1% of women who had their first birth between the ages of 27-29 had only incomplete primary or no schooling (Table 3). Older mothers tend to be in a higher wealth quintile: 42.9% of women who had their first birth between the ages of 27-29 are in the richest quintile while 11.7% of mothers age 15-17 are in the richest quintile (Table 3). 71.2% of mothers who had their first birth between the ages of 15 and 17 live in rural areas, while 35% of women who have their first birth between the ages of 27-29 live in rural areas (Table 3). Delaying first birth is more likely in urban areas. Women who have their first birth later are also more likely to live in conditions that are more sanitary: 57.3% of women who have their first birth between the ages of 27 and 29 have a flush toilet at the house compared to 16.4% of 15-17 year old first time mothers (Table 3).

Deleted: do

Women who delay their first birth are more educated, more likely to have a partner, are richer, more likely to live in an urban area, and more likely to live in better sanitary conditions. Young mothers tend to have lower educational and socio-economic characteristics. In the following analysis, we present both unadjusted results and results that control for these covariates (Table 3).

Table 3: Weighted Frequency and Distribution Covariates Across Age of Mother at Birth

| Age Band                                                                         | 12-14<br>Pop. W'tedFrac.<br>n=4,322 | 15-17<br>Pop. W'tedFrac.<br>n=41,384 | 18-20<br>Pop. W'tedFrac.<br>n=61,491 | 21-23<br>Pop. W'tedFrac.<br>n=38,300 | 24-26<br>Pop. W'tedFrac.<br>n=18,211 | 27-29<br>Pop. W'tedFrac.<br>n=7,939 | 30-32<br>Pop. W'tedFrac.<br>n=3,493 | 33-35<br>Pop. W'tedFrac.<br>n=1,443 |
|----------------------------------------------------------------------------------|-------------------------------------|--------------------------------------|--------------------------------------|--------------------------------------|--------------------------------------|-------------------------------------|-------------------------------------|-------------------------------------|
| <b>Sex of Child</b>                                                              |                                     |                                      |                                      |                                      |                                      |                                     |                                     |                                     |
| Male                                                                             | 2,323 0.517                         | 21,627 0.512                         | 31,995 0.515                         | 19,017 0.504                         | 8,941 0.514                          | 3,964 0.518                         | 1,731 0.513                         | 705 0.504                           |
| Female                                                                           | 2,173 0.483                         | 20,607 0.488                         | 30,096 0.485                         | 18,741 0.496                         | 8,443 0.486                          | 3,685 0.482                         | 1,646 0.487                         | 694 0.496                           |
| <b>Type of Birth</b>                                                             |                                     |                                      |                                      |                                      |                                      |                                     |                                     |                                     |
| Singleton                                                                        | 4,477 0.996                         | 42,003 0.995                         | 61,701 0.994                         | 37,376 0.990                         | 17,173 0.988                         | 7,532 0.985                         | 3,317 0.982                         | 1,369 0.979                         |
| Twin                                                                             | 19 0.004                            | 230 0.005                            | 390 0.006                            | 382 0.010                            | 211 0.012                            | 116 0.015                           | 60 0.018                            | 30 0.021                            |
| <b>Age of Child in Months</b>                                                    |                                     |                                      |                                      |                                      |                                      |                                     |                                     |                                     |
| 48-60 months                                                                     | 1,380 0.307                         | 11,154 0.264                         | 15,402 0.248                         | 9,272 0.246                          | 4,269 0.246                          | 1,841 0.241                         | 890 0.263                           | 335 0.240                           |
| 36-47 months                                                                     | 1,260 0.280                         | 10,537 0.249                         | 14,491 0.233                         | 9,378 0.248                          | 4,176 0.240                          | 1,822 0.238                         | 822 0.243                           | 307 0.219                           |
| 24-35 months                                                                     | 995 0.221                           | 10,125 0.240                         | 15,252 0.246                         | 9,419 0.249                          | 4,191 0.241                          | 1,885 0.246                         | 839 0.248                           | 376 0.269                           |
| 12-23 months                                                                     | 862 0.192                           | 10,418 0.247                         | 16,946 0.273                         | 9,687 0.257                          | 4,748 0.273                          | 2,100 0.275                         | 827 0.245                           | 381 0.272                           |
| <b>Education Level of the Mother at Time of Interview</b>                        |                                     |                                      |                                      |                                      |                                      |                                     |                                     |                                     |
| Secondary or higher                                                              | 30 0.007                            | 1,518 0.036                          | 9,263 0.149                          | 11,213 0.297                         | 7,607 0.438                          | 3,979 0.520                         | 1,836 0.544                         | 705 0.504                           |
| Completed primary                                                                | 957 0.213                           | 13,415 0.318                         | 22,837 0.368                         | 12,459 0.330                         | 4,961 0.285                          | 1,899 0.248                         | 781 0.231                           | 336 0.241                           |
| No education or incomplete primary                                               | 3,509 0.780                         | 27,300 0.646                         | 29,991 0.483                         | 14,085 0.373                         | 4,816 0.277                          | 1,770 0.231                         | 760 0.225                           | 357 0.256                           |
| <b>Mother has a Partner</b>                                                      |                                     |                                      |                                      |                                      |                                      |                                     |                                     |                                     |
| Yes                                                                              | 4,101 0.912                         | 38,606 0.914                         | 57,623 0.928                         | 35,469 0.939                         | 16,378 0.942                         | 7,208 0.942                         | 3,181 0.942                         | 1,291 0.923                         |
| No                                                                               | 395 0.088                           | 3,627 0.086                          | 4,468 0.072                          | 2,288 0.061                          | 1,006 0.058                          | 440 0.058                           | 196 0.058                           | 108 0.077                           |
| <b>Education Level of the Mother's Partner at the Time of Interview</b>          |                                     |                                      |                                      |                                      |                                      |                                     |                                     |                                     |
| Completed Secondary or Higher                                                    | 669 0.149                           | 8,265 0.196                          | 17,087 0.275                         | 14,040 0.372                         | 8,148 0.469                          | 4,113 0.538                         | 1,876 0.556                         | 746 0.533                           |
| Completed primary                                                                | 1,107 0.246                         | 12,977 0.307                         | 21,683 0.349                         | 12,533 0.332                         | 5,193 0.299                          | 2,031 0.266                         | 802 0.238                           | 328 0.235                           |
| No education or incomplete primary                                               | 2,721 0.605                         | 20,992 0.497                         | 23,321 0.376                         | 11,184 0.296                         | 4,042 0.233                          | 1,504 0.197                         | 699 0.207                           | 325 0.232                           |
| <b>Age Band of the Mother's Partner at the Birth of the Mother's First Birth</b> |                                     |                                      |                                      |                                      |                                      |                                     |                                     |                                     |
| 12-17                                                                            | 313 0.070                           | 1,250 0.030                          | 407 0.007                            | 109 0.003                            | 20 0.001                             | 4 0.001                             | 1 0.000                             | 1 0.000                             |
| 18-23                                                                            | 1,587 0.353                         | 14,655 0.347                         | 17,407 0.280                         | 5,426 0.144                          | 898 0.052                            | 227 0.030                           | 55 0.016                            | 17 0.012                            |
| 24-29                                                                            | 2,256 0.502                         | 22,157 0.525                         | 36,519 0.588                         | 24,543 0.650                         | 10,869 0.625                         | 3,671 0.480                         | 1,220 0.361                         | 487 0.348                           |
| 30-35                                                                            | 214 0.048                           | 2,756 0.065                          | 5,480 0.088                          | 5,634 0.149                          | 3,981 0.229                          | 2,491 0.326                         | 1,203 0.356                         | 313 0.223                           |
| 36-41                                                                            | 83 0.019                            | 896 0.021                            | 1,467 0.024                          | 1,319 0.035                          | 1,155 0.066                          | 848 0.111                           | 631 0.187                           | 371 0.265                           |
| 42-59                                                                            | 44 0.010                            | 520 0.012                            | 812 0.013                            | 727 0.019                            | 461 0.027                            | 407 0.053                           | 267 0.079                           | 211 0.151                           |
| <b>Wealth Quintile of the Child's Household</b>                                  |                                     |                                      |                                      |                                      |                                      |                                     |                                     |                                     |
| Richest                                                                          | 366 0.081                           | 4,937 0.117                          | 10,572 0.170                         | 9,490 0.251                          | 6,196 0.356                          | 3,283 0.429                         | 1,423 0.421                         | 557 0.398                           |
| Rich                                                                             | 710 0.158                           | 7,659 0.181                          | 13,466 0.217                         | 9,088 0.241                          | 3,972 0.228                          | 1,700 0.222                         | 815 0.241                           | 340 0.243                           |
| Middle                                                                           | 950 0.211                           | 9,159 0.217                          | 13,772 0.222                         | 7,453 0.197                          | 2,950 0.170                          | 1,185 0.155                         | 517 0.153                           | 216 0.154                           |
| Poorer                                                                           | 1,194 0.265                         | 10,329 0.245                         | 12,770 0.206                         | 6,330 0.168                          | 2,354 0.135                          | 838 0.110                           | 350 0.103                           | 160 0.114                           |
| Poorest                                                                          | 1,277 0.284                         | 10,148 0.240                         | 11,511 0.185                         | 5,397 0.143                          | 1,911 0.110                          | 642 0.084                           | 273 0.081                           | 126 0.090                           |

|    |                                                                    |             |              |              |              |             |             |             |           |
|----|--------------------------------------------------------------------|-------------|--------------|--------------|--------------|-------------|-------------|-------------|-----------|
| 1  | <b>Residence of the Child's Household at the Time of Interview</b> |             |              |              |              |             |             |             |           |
| 2  | Urban                                                              | 1,033 0.230 | 12,159 0.288 | 22,251 0.358 | 16,999 0.450 | 9,721 0.559 | 4,969 0.650 | 2,315 0.686 | 949 0.678 |
| 3  | Rural                                                              | 3,463 0.770 | 30,074 0.712 | 39,840 0.642 | 20,759 0.550 | 7,663 0.441 | 2,679 0.350 | 1,062 0.314 | 450 0.322 |
| 4  | <b>Water Piped to Child's House</b>                                |             |              |              |              |             |             |             |           |
| 5  | Piped to House                                                     | 1,082 0.241 | 13,530 0.320 | 25,731 0.414 | 18,816 0.498 | 9,906 0.570 | 4,736 0.619 | 2,149 0.636 | 896 0.640 |
| 6  | Water not piped to house                                           | 3,415 0.759 | 28,704 0.680 | 36,360 0.586 | 18,942 0.502 | 7,478 0.430 | 2,912 0.381 | 1,228 0.364 | 503 0.360 |
| 7  | <b>Flush Toilet at Child's House</b>                               |             |              |              |              |             |             |             |           |
| 8  | Flush Toilet at House                                              | 434 0.097   | 6,908 0.164  | 16,700 0.269 | 14,506 0.384 | 8,551 0.492 | 4,380 0.573 | 2,080 0.616 | 859 0.614 |
| 9  | No Flush Toilet at House                                           | 4,062 0.903 | 35,325 0.836 | 45,390 0.731 | 23,251 0.616 | 8,832 0.508 | 3,269 0.427 | 1,297 0.384 | 540 0.386 |
| 10 | <b>Child Measles Vaccination</b>                                   |             |              |              |              |             |             |             |           |
| 11 | Cluster Weighted Mean                                              | 0.359       | 0.298        | 0.238        | 0.202        | 0.166       | 0.145       | 0.125       | 0.139     |

For peer review only

12  
13  
14  
15  
16  
17  
18  
19  
20  
21  
22  
23  
24  
25  
26  
27  
28  
29  
30  
31  
32  
33  
34  
35  
36  
37  
38  
39  
40  
41  
42  
43  
44  
45  
46  
47  
48  
49

**Results: Unadjusted and Adjusted Models**

1 The unadjusted pooled results indicate that the risk of infant mortality is lowest for women who have their first  
 2 birth between the ages of 27-29 (Table A3). The relative risk ratio declines as age increases between the ages of 12 and  
 3 26, and is lowest for 27-29 year olds (Table A3). The relative risk ratio then increases for women who have their first  
 4 birth at 33-35 (Table A3). This same U-shape is exhibited in many of the country specific unadjusted regressions. Benin,  
 5 Bolivia, India, Senegal and Tanzania are examples where the child survival is maximized if the first birth is delayed to the  
 6 ages of 27-29, and most countries (38/55) follow this pattern (Table A3).

Deleted: comes to a minimum

7  
 8  
 9  
 10  
 11 Age of the mother at first birth is a risk factor for infant mortality and adverse child health outcomes in adjusted  
 12 analysis controlling for maternal, paternal, and household and social characteristics (Table 4). The relative risk ratios of  
 13 each age group (relative to 27-29 year olds who are the reference group) and 95% confidence intervals are plotted in  
 14 **Figure 2**. Child health outcomes improve with increasing age of the mother at first birth through to age 27-29, even after  
 15 controlling for maternal, paternal, household and social factor covariates (Table 4, Figure 2).

Deleted: even when we

16  
 17  
 18  
 19  
 20  
 21  
 22  
 23  
 24  
 25  
 26  
 27  
 28  
 29  
 30  
 31  
 32  
 33  
 34  
 35  
 36  
 37  
 38  
 39  
 40  
 41  
 42  
 43  
 44  
 45  
 46  
 47  
 48  
 49  
 50  
 51  
 52  
 53  
 54  
 55  
 56  
 57  
 58  
 59  
 60

Maternal and paternal age have different effects on child health outcomes (Table 4). In the cases of infant mortality, underweight, wasting, and anaemia, maternal and paternal age have similar effect sizes indicating the role of social mechanisms (Table 4). In the case of stunting and diarrhoea, while having a very young father increases the relative risk of poor child health outcomes, the effect is significantly smaller than that of the mother's age, strengthening the case that the effect has a biological component for these two child health outcomes (Table 4). There may be concern that the effect of age of mother on child health outcomes may be changing over time. Although the year of birth is controlled for, this only controls for year specific events and not for an interaction between age of the mother and the year of birth. To explore this possibility, Table A4 is the same model as that in Table 4 but the sample is restricted surveys between 2000 and 2005. Comparison of results in Table A4 and Table 4 shows that the effect of age of mother on child health is similar across the two samples. This comparison suggests that the effect of age on child health outcomes is changing over the study period.

Deleted: in

Deleted: and in some cases 30-32 (except for wasting)

Deleted: has

Deleted: approximately equal relative risk

Table 4: Adjusted Relative Risk of Infant Mortality and Child Health Outcome by Age of Mother at First Birth

|                                                                         | Infant Mortality         | Stunting                 | Underweight              | Wasting                  | Diarrhoea                | Moderate Anaemia         |
|-------------------------------------------------------------------------|--------------------------|--------------------------|--------------------------|--------------------------|--------------------------|--------------------------|
| <b>Age Band of the Mother at First Birth</b>                            |                          |                          |                          |                          |                          |                          |
| <b>27-29 (Reference)</b>                                                | 1.00                     | 1.00                     | 1.00                     | 1.00                     | 1.00                     | 1.00                     |
| 12-14                                                                   | 1.703<br>(1.478 - 1.962) | 1.507<br>(1.416 - 1.603) | 1.351<br>(1.236 - 1.477) | 1.027<br>(0.870 - 1.211) | 1.365<br>(1.216 - 1.533) | 1.315<br>(1.131 - 1.528) |
| 15-17                                                                   | 1.307<br>(1.160 - 1.474) | 1.341<br>(1.274 - 1.412) | 1.218<br>(1.131 - 1.313) | 1.040<br>(0.923 - 1.170) | 1.326<br>(1.224 - 1.436) | 1.357<br>(1.222 - 1.507) |
| 18-20                                                                   | 1.083<br>(0.963 - 1.219) | 1.272<br>(1.210 - 1.338) | 1.122<br>(1.043 - 1.207) | 1.007<br>(0.899 - 1.129) | 1.244<br>(1.151 - 1.343) | 1.327<br>(1.200 - 1.468) |
| 21-23                                                                   | 1.018<br>(0.903 - 1.148) | 1.191<br>(1.132 - 1.254) | 1.052<br>(0.976 - 1.132) | 1.018<br>(0.908 - 1.141) | 1.227<br>(1.135 - 1.326) | 1.349<br>(1.219 - 1.493) |
| 24-26                                                                   | 1.079<br>(0.948 - 1.228) | 1.087<br>(1.028 - 1.148) | 0.989<br>(0.912 - 1.071) | 1.004<br>(0.889 - 1.135) | 1.108<br>(1.019 - 1.203) | 1.239<br>(1.114 - 1.378) |
| 30-32                                                                   | 1.191<br>(0.981 - 1.445) | 0.925<br>(0.845 - 1.013) | 0.824<br>(0.717 - 0.947) | 0.915<br>(0.749 - 1.119) | 0.979<br>(0.860 - 1.115) | 1.117<br>(0.947 - 1.317) |
| 33-35                                                                   | 1.340<br>(1.041 - 1.725) | 1.025<br>(0.908 - 1.156) | 0.872<br>(0.715 - 1.062) | 0.976<br>(0.733 - 1.299) | 0.831<br>(0.687 - 1.006) | 1.079<br>(0.854 - 1.362) |
| <b>Sex of Child</b>                                                     |                          |                          |                          |                          |                          |                          |
| <b>Male (Reference)</b>                                                 | 1.00                     | 1.00                     | 1.00                     | 1.00                     | 1.00                     | 1.00                     |
| Female                                                                  | 0.787<br>(0.759 - 0.815) | 0.900<br>(0.888 - 0.913) | 0.915<br>(0.895 - 0.935) | 0.854<br>(0.821 - 0.889) | 0.927<br>(0.903 - 0.951) | 0.956<br>(0.927 - 0.985) |
| <b>Type of Birth</b>                                                    |                          |                          |                          |                          |                          |                          |
| <b>Singleton (Reference)</b>                                            | 1.00                     | 1.00                     | 1.00                     | 1.00                     | 1.00                     | 1.00                     |
| Twin                                                                    | 4.998<br>(4.609 - 5.421) | 1.302<br>(1.207 - 1.404) | 1.627<br>(1.459 - 1.814) | 1.264<br>(1.018 - 1.570) | 0.918<br>(0.782 - 1.077) | 1.135<br>(0.963 - 1.337) |
| <b>Age of Child in Months</b>                                           |                          |                          |                          |                          |                          |                          |
| <b>48-59 months (Reference)</b>                                         |                          | 1.00                     | 1.00                     | 1.00                     | 1.00                     | 1.00                     |
| 36-47 months                                                            |                          | 1.146<br>(1.119 - 1.174) | 1.023<br>(0.986 - 1.062) | 0.986<br>(0.916 - 1.060) | 1.392<br>(1.311 - 1.477) | 1.219<br>(1.147 - 1.296) |
| 24-35 months                                                            |                          | 1.246<br>(1.217 - 1.275) | 1.123<br>(1.083 - 1.164) | 1.145<br>(1.066 - 1.229) | 2.446<br>(2.316 - 2.582) | 1.609<br>(1.513 - 1.711) |
| 12-23 months                                                            |                          | 1.169<br>(1.141 - 1.198) | 1.114<br>(1.073 - 1.156) | 1.572<br>(1.466 - 1.686) | 3.818<br>(3.625 - 4.021) | 2.240<br>(2.102 - 2.386) |
| <b>Education Level of the Mother at Time of Interview</b>               |                          |                          |                          |                          |                          |                          |
| <b>Secondary or Higher (Reference)</b>                                  | 1.00                     | 1.00                     | 1.00                     | 1.00                     | 1.00                     | 1.00                     |
| Completed Primary                                                       | 1.266<br>(1.160 - 1.382) | 1.286<br>(1.243 - 1.329) | 1.282<br>(1.214 - 1.354) | 1.022<br>(0.945 - 1.105) | 1.143<br>(1.092 - 1.196) | 1.079<br>(1.009 - 1.154) |
| No education or incomplete primary                                      | 1.626<br>(1.480 - 1.786) | 1.482<br>(1.429 - 1.536) | 1.586<br>(1.495 - 1.681) | 1.243<br>(1.141 - 1.355) | 1.192<br>(1.131 - 1.256) | 1.159<br>(1.075 - 1.248) |
| <b>Mother has a Partner</b>                                             |                          |                          |                          |                          |                          |                          |
| <b>Yes (Reference)</b>                                                  | 1.00                     | 1.00                     | 1.00                     | 1.00                     | 1.00                     | 1.00                     |
| No                                                                      | 0.977<br>(0.881 - 1.084) | 1.148<br>(1.106 - 1.193) | 1.237<br>(1.158 - 1.322) | 1.232<br>(1.101 - 1.379) | 1.105<br>(1.043 - 1.170) | 1.110<br>(1.022 - 1.206) |
| <b>Education Level of the Mother's Partner at the Time of Interview</b> |                          |                          |                          |                          |                          |                          |

|    |                                                                                  |                 |                 |                 |                 |                 |                 |
|----|----------------------------------------------------------------------------------|-----------------|-----------------|-----------------|-----------------|-----------------|-----------------|
| 1  | <b>Higher (Reference)</b>                                                        | 1.00            | 1.00            | 1.00            | 1.00            | 1.00            | 1.00            |
| 2  | Completed primary                                                                | 1.099           | 1.068           | 1.097           | 1.037           | 1.059           | 1.053           |
| 3  |                                                                                  | (1.027 - 1.176) | (1.040 - 1.097) | (1.052 - 1.144) | (0.969 - 1.109) | (1.015 - 1.104) | (0.993 - 1.117) |
| 4  | <b>Age Band of the Mother's Partner at the Birth of the Mother's First Birth</b> |                 |                 |                 |                 |                 |                 |
| 5  | <b>24-29 (Reference)</b>                                                         | 1.00            | 1.00            | 1.00            | 1.00            | 1.00            | 1.00            |
| 6  | 12-17                                                                            | 1.410           | 1.148           | 1.125           | 1.008           | 1.049           | 1.090           |
| 7  |                                                                                  | (1.237 - 1.606) | (1.081 - 1.219) | (1.017 - 1.245) | (0.801 - 1.269) | (0.932 - 1.181) | (0.937 - 1.269) |
| 8  | 18-23                                                                            | 1.077           | 1.054           | 1.026           | 0.979           | 1.032           | 1.050           |
| 9  |                                                                                  | (1.026 - 1.130) | (1.035 - 1.073) | (0.997 - 1.056) | (0.927 - 1.034) | (0.997 - 1.068) | (1.010 - 1.092) |
| 10 | 30-35                                                                            | 0.942           | 0.964           | 0.953           | 0.941           | 0.958           | 0.997           |
| 11 |                                                                                  | (0.884 - 1.005) | (0.939 - 0.990) | (0.918 - 0.990) | (0.882 - 1.004) | (0.915 - 1.002) | (0.949 - 1.046) |
| 12 | 36-41                                                                            | 0.996           | 0.986           | 0.932           | 0.929           | 1.032           | 1.069           |
| 13 |                                                                                  | (0.904 - 1.097) | (0.945 - 1.028) | (0.875 - 0.992) | (0.835 - 1.034) | (0.960 - 1.108) | (0.994 - 1.149) |
| 14 | 42-59                                                                            | 1.046           | 1.036           | 1.030           | 0.977           | 1.101           | 0.962           |
| 15 |                                                                                  | (0.932 - 1.173) | (0.983 - 1.093) | (0.954 - 1.111) | (0.855 - 1.118) | (1.004 - 1.207) | (0.874 - 1.060) |
| 16 | <b>Wealth Quintile of the Child's Household</b>                                  |                 |                 |                 |                 |                 |                 |
| 17 | <b>Richest (Reference)</b>                                                       | 1.00            | 1.00            | 1.00            | 1.00            | 1.00            | 1.00            |
| 18 | Rich                                                                             | 1.138           | 1.182           | 1.272           | 1.110           | 1.171           | 1.157           |
| 19 |                                                                                  | (1.063 - 1.219) | (1.148 - 1.216) | (1.216 - 1.331) | (1.032 - 1.194) | (1.117 - 1.227) | (1.093 - 1.224) |
| 20 | Middle                                                                           | 1.223           | 1.257           | 1.416           | 1.276           | 1.209           | 1.246           |
| 21 |                                                                                  | (1.136 - 1.316) | (1.218 - 1.297) | (1.348 - 1.486) | (1.176 - 1.384) | (1.149 - 1.272) | (1.170 - 1.326) |
| 22 | Poorer                                                                           | 1.268           | 1.332           | 1.524           | 1.344           | 1.244           | 1.287           |
| 23 |                                                                                  | (1.173 - 1.371) | (1.289 - 1.376) | (1.448 - 1.604) | (1.233 - 1.466) | (1.177 - 1.314) | (1.203 - 1.378) |
| 24 | Poorest                                                                          | 1.289           | 1.445           | 1.671           | 1.458           | 1.289           | 1.338           |
| 25 |                                                                                  | (1.187 - 1.399) | (1.397 - 1.496) | (1.585 - 1.762) | (1.331 - 1.598) | (1.213 - 1.369) | (1.245 - 1.438) |
| 26 | <b>Residence of the Child's Household at the Time of Interview</b>               |                 |                 |                 |                 |                 |                 |
| 27 | <b>Urban (Reference)</b>                                                         | 1.00            | 1.00            | 1.00            | 1.00            | 1.00            | 1.00            |
| 28 | Rural                                                                            | 1.043           | 1.082           | 1.029           | 0.943           | 0.939           | 0.981           |
| 29 |                                                                                  | (0.991 - 1.099) | (1.059 - 1.106) | (0.996 - 1.064) | (0.891 - 0.998) | (0.905 - 0.974) | (0.937 - 1.026) |
| 30 | <b>Water Piped to the Child's House</b>                                          |                 |                 |                 |                 |                 |                 |
| 31 | <b>Piped to house (Reference)</b>                                                | 1.00            | 1.00            | 1.00            | 1.00            | 1.00            | 1.00            |
| 32 | Water not piped to house                                                         | 1.100           | 0.956           | 1.031           | 1.034           | 1.002           | 0.988           |
| 33 |                                                                                  | (1.047 - 1.156) | (0.938 - 0.975) | (1.000 - 1.063) | (0.980 - 1.092) | (0.969 - 1.037) | (0.950 - 1.029) |
| 34 | <b>Flush Toilet at Child's House</b>                                             |                 |                 |                 |                 |                 |                 |
| 35 | <b>Flush toilet at house (Reference)</b>                                         | 1.00            | 1.00            | 1.00            | 1.00            | 1.00            | 1.00            |
| 36 | No flush toilet at house                                                         | 1.137           | 1.224           | 1.137           | 1.045           | 1.041           | 1.035           |
| 37 |                                                                                  | (1.062 - 1.217) | (1.191 - 1.259) | (1.091 - 1.184) | (0.978 - 1.116) | (0.997 - 1.087) | (0.982 - 1.090) |
| 38 | <b>Child Measles Vaccination</b>                                                 |                 |                 |                 |                 |                 |                 |
| 39 | <b>Vaccinated (Reference)</b>                                                    | 1.00            | 1.00            | 1.00            | 1.00            | 1.00            | 1.00            |
| 40 | Not vaccinated                                                                   | 1.108           | 1.070           | 1.164           | 1.195           | 1.072           | 1.109           |
| 41 |                                                                                  | (1.038 - 1.183) | (1.042 - 1.100) | (1.120 - 1.209) | (1.113 - 1.284) | (1.020 - 1.127) | (1.051 - 1.170) |
| 42 | <b>Observations</b>                                                              | 176,583         | 119,018         | 122,680         | 120,246         | 135,121         | 31,520          |

**Deleted:** Viewed another way, the social and biological mechanisms can be disentangled by stratifying regressions by socio-economic status

1 The effect of young age of mother at first birth on poor child health outcomes reflects a combination of biological and  
 2 social factors. If the effect were solely social, then we would expect no age gradient for women grouped into high and  
 3 low socio-economic status. That is, if all women are of the same socio-economic status, then any age gradient reflects  
 4 the biological mechanism. This hypothesis is explored by stratifying low and high socio-economic status. For the high SES  
 5 group we select children who have mothers who have completed at least primary school, in households that are in one  
 6 of the top two wealth quintiles and who live in an urban area (Table 5). In contrast, we select the children with mothers  
 7 who have not completed primary school, are in households that are in the bottom two wealth quintiles and live in a  
 8 rural area into the low socio-economic status group. At the top of **Table 5** we report the absolute prevalence of the child  
 9 health outcome by this stratification. In the high SES group 3.0% of the infants die, while in the low SES households  
 10 10.4% of the infants die (Table 5). Stunting, underweight, wasting diarrhoea and anaemia are all much more prevalent in  
 11 low SES households than in the high SES households (Table 5). However, when considering the relative risk ratios across  
 12 the age groups for outcomes of stunting, underweight and diarrhoea, the relative risk of a poor health outcome for  
 13 young mothers is higher in the high SES households than in the low SES households (Table 5). The difference in the  
 14 relative risk of age on these child health outcomes across the two groups indicates that early childbearing is not just a  
 15 risk factor in lower socio-economic groups, and that the biological mechanism of young mothers plays a role in  
 16 determining child health outcomes.

**Deleted:** at least

**Deleted:** We

**Deleted:** this group of

**Deleted:** problem

Table 5: Adjusted Relative Risk Ratios in High SES and Low SES Households

|                                              | Infant Mortality |                 | Stunting        |                 | Underweight     |                 | Wasting         |                 | Diarrhea        |                 | Moderate Anemia |                 |
|----------------------------------------------|------------------|-----------------|-----------------|-----------------|-----------------|-----------------|-----------------|-----------------|-----------------|-----------------|-----------------|-----------------|
|                                              | High SES         | Low SES         | High SES        | Low SES         | High SES        | Low SES         | High SES        | Low SES         | High SES        | Low SES         | High SES        | Low SES         |
| <b>Prevalence (Weighted %)</b>               | <b>2.99</b>      | <b>10.4</b>     | <b>18.6</b>     | <b>54.2</b>     | <b>7.92</b>     | <b>33.6</b>     | <b>4.46</b>     | <b>11.7</b>     | <b>11</b>       | <b>15.4</b>     | <b>21.4</b>     | <b>42.2</b>     |
| <b>Age Band of the Mother at First Birth</b> |                  |                 |                 |                 |                 |                 |                 |                 |                 |                 |                 |                 |
| <b>27-29 (reference)</b>                     | 1.00             | 1.00            | 1.00            | 1.00            | 1.00            | 1.00            | 1.00            | 1.00            | 1.00            | 1.00            | 1.00            | 1.00            |
| 12-14                                        | 1.757            | 1.747           | 1.899           | 1.244           | 1.750           | 1.167           | 0.875           | 1.062           | 1.792           | 1.342           | 0.388           | 1.438           |
|                                              | (1.015 - 3.040)  | (1.338 - 2.283) | (1.473 - 2.449) | (1.118 - 1.385) | (1.169 - 2.619) | (1.004 - 1.355) | (0.358 - 2.140) | (0.776 - 1.452) | (1.229 - 2.612) | (1.057 - 1.702) | (0.108 - 1.400) | (1.047 - 1.974) |
| 15-17                                        | 1.297            | 1.315           | 1.474           | 1.143           | 1.377           | 1.066           | 1.234           | 0.968           | 1.377           | 1.181           | 1.234           | 1.504           |
|                                              | (0.984 - 1.710)  | (1.029 - 1.681) | (1.313 - 1.655) | (1.040 - 1.257) | (1.147 - 1.654) | (0.935 - 1.215) | (0.950 - 1.602) | (0.744 - 1.258) | (1.172 - 1.618) | (0.964 - 1.446) | (1.001 - 1.521) | (1.144 - 1.978) |
| 18-20                                        | 1.087            | 1.104           | 1.308           | 1.085           | 1.260           | 0.984           | 1.181           | 0.964           | 1.395           | 1.107           | 1.154           | 1.433           |
|                                              | (0.846 - 1.398)  | (0.865 - 1.409) | (1.179 - 1.452) | (0.987 - 1.192) | (1.071 - 1.482) | (0.863 - 1.121) | (0.951 - 1.467) | (0.743 - 1.250) | (1.214 - 1.603) | (0.905 - 1.354) | (0.964 - 1.381) | (1.092 - 1.880) |
| 21-23                                        | 1.020            | 1.016           | 1.221           | 1.065           | 1.156           | 0.948           | 1.198           | 0.990           | 1.318           | 1.126           | 1.203           | 1.500           |
|                                              | (0.800 - 1.300)  | (0.790 - 1.307) | (1.102 - 1.352) | (0.968 - 1.171) | (0.985 - 1.357) | (0.830 - 1.084) | (0.976 - 1.472) | (0.759 - 1.292) | (1.152 - 1.508) | (0.917 - 1.382) | (1.008 - 1.437) | (1.141 - 1.972) |
| 24-26                                        | 1.015            | 1.116           | 1.083           | 0.989           | 1.028           | 0.941           | 1.207           | 1.076           | 1.206           | 1.139           | 1.105           | 1.424           |
|                                              | (0.783 - 1.315)  | (0.848 - 1.470) | (0.972 - 1.208) | (0.890 - 1.100) | (0.871 - 1.215) | (0.811 - 1.091) | (0.979 - 1.489) | (0.811 - 1.428) | (1.048 - 1.388) | (0.911 - 1.425) | (0.925 - 1.320) | (1.066 - 1.901) |
| 30-32                                        | 1.647            | 0.710           | 0.918           | 0.911           | 0.875           | 0.827           | 0.971           | 0.832           | 0.940           | 1.111           | 1.151           | 1.270           |
|                                              | (1.183 - 2.291)  | (0.414 - 1.216) | (0.771 - 1.093) | (0.760 - 1.093) | (0.666 - 1.150) | (0.624 - 1.097) | (0.697 - 1.351) | (0.488 - 1.418) | (0.757 - 1.167) | (0.777 - 1.590) | (0.886 - 1.496) | (0.820 - 1.966) |
| 33-35                                        | 1.407            | 0.956           | 1.049           | 1.222           | 0.743           | 0.860           | 1.128           | 0.650           | 0.769           | 0.821           | 1.036           | 1.438           |
|                                              | (0.846 - 2.341)  | (0.525 - 1.740) | (0.822 - 1.338) | (1.013 - 1.473) | (0.471 - 1.170) | (0.594 - 1.245) | (0.713 - 1.785) | (0.287 - 1.473) | (0.555 - 1.065) | (0.488 - 1.379) | (0.686 - 1.565) | (0.826 - 2.502) |
| <b>Sex of Child</b>                          |                  |                 |                 |                 |                 |                 |                 |                 |                 |                 |                 |                 |
| <b>Male (reference)</b>                      | 1.00             | 1.00            | 1.00            | 1.00            | 1.00            | 1.00            | 1.00            | 1.00            | 1.00            | 1.00            | 1.00            | 1.00            |
| Female                                       | 0.700            | 0.829           | 0.850           | 0.929           | 0.911           | 0.921           | 0.886           | 0.843           | 0.913           | 0.959           | 0.942           | 0.963           |
|                                              | (0.627 - 0.782)  | (0.781 - 0.881) | (0.814 - 0.888) | (0.908 - 0.951) | (0.850 - 0.977) | (0.890 - 0.954) | (0.802 - 0.979) | (0.786 - 0.905) | (0.859 - 0.969) | (0.910 - 1.011) | (0.868 - 1.021) | (0.910 - 1.019) |
| <b>Type of Birth</b>                         |                  |                 |                 |                 |                 |                 |                 |                 |                 |                 |                 |                 |
| <b>Singleton (reference)</b>                 | 1.00             | 1.00            | 1.00            | 1.00            | 1.00            | 1.00            | 1.00            | 1.00            | 1.00            | 1.00            | 1.00            | 1.00            |
| Twin                                         | 5.439            | 4.557           | 1.212           | 1.271           | 1.704           | 1.448           | 1.365           | 1.392           | 0.768           | 1.015           | 1.061           | 1.183           |
|                                              | (4.278 - 6.916)  | (3.932 - 5.281) | (0.991 - 1.482) | (1.111 - 1.454) | (1.290 - 2.251) | (1.179 - 1.778) | (0.898 - 2.074) | (0.917 - 2.112) | (0.533 - 1.106) | (0.716 - 1.437) | (0.733 - 1.534) | (0.860 - 1.627) |
| <b>Age of Child in Months</b>                |                  |                 |                 |                 |                 |                 |                 |                 |                 |                 |                 |                 |
| <b>Age 48-59 months (reference)</b>          |                  |                 | 1.00            | 1.00            | 1.00            | 1.00            | 1.00            | 1.00            | 1.00            | 1.00            | 1.00            | 1.00            |
| 36-47 months                                 |                  |                 | 1.239           | 1.118           | 1.037           | 1.037           | 0.877           | 0.994           | 1.410           | 1.453           | 1.258           | 1.219           |
|                                              |                  |                 | (1.145 - 1.341) | (1.076 - 1.162) | (0.919 - 1.170) | (0.976 - 1.102) | (0.741 - 1.039) | (0.868 - 1.138) | (1.229 - 1.617) | (1.289 - 1.638) | (1.064 - 1.487) | (1.095 - 1.357) |



|    |                                                                                  |          |          |          |          |          |          |          |          |          |          |          |
|----|----------------------------------------------------------------------------------|----------|----------|----------|----------|----------|----------|----------|----------|----------|----------|----------|
| 1  | 24-35 months                                                                     |          | 1.415    | 1.172    | 1.182    | 1.142    | 0.956    | 1.236    | 2.466    | 2.507    | 1.763    | 1.469    |
| 2  |                                                                                  |          | (1.310 - | (1.129 - | (1.049 - | (1.077 - | (0.806 - | (1.086 - | (2.174 - | (2.246 - | (1.493 - | (1.319 - |
| 3  |                                                                                  |          | 1.528)   | 1.216)   | 1.331)   | 1.211)   | 1.133)   | 1.408)   | 2.796)   | 2.799)   | 2.081)   | 1.637)   |
| 4  | 12-23 months                                                                     |          | 1.392    | 1.081    | 1.107    | 1.151    | 1.156    | 1.853    | 3.891    | 3.720    | 2.585    | 1.927    |
| 5  |                                                                                  |          | (1.287 - | (1.040 - | (0.977 - | (1.084 - | (0.974 - | (1.632 - | (3.449 - | (3.347 - | (2.163 - | (1.727 - |
| 6  |                                                                                  |          | 1.506)   | 1.124)   | 1.254)   | 1.222)   | 1.371)   | 2.104)   | 4.389)   | 4.135)   | 3.090)   | 2.149)   |
| 7  | <b>Education Level of the Mother at Time of Interview</b>                        |          |          |          |          |          |          |          |          |          |          |          |
| 8  | <b>Secondary or Higher (reference)</b>                                           | 1.00     | 1.00     |          | 1.00     |          | 1.00     |          | 1.00     |          | 1.00     |          |
| 9  | Completed Primary                                                                | 1.220    | 1.266    |          | 1.208    |          | 1.103    |          | 1.177    |          | 1.099    |          |
| 10 |                                                                                  | (1.049 - | (1.191 - |          | (1.101 - |          | (0.969 - |          | (1.085 - |          | (0.987 - |          |
| 11 |                                                                                  | 1.420)   | 1.346)   |          | 1.325)   |          | 1.255)   |          | 1.277)   |          | 1.223)   |          |
| 12 | <b>Mother has a Partner</b>                                                      |          |          |          |          |          |          |          |          |          |          |          |
| 13 | <b>Omitted Category: Yes</b>                                                     |          |          |          |          |          |          |          |          |          |          |          |
| 14 | No                                                                               | 1.012    | 0.960    | 1.215    | 1.038    | 1.333    | 1.180    | 1.249    | 1.608    | 1.038    | 1.223    | 1.100    |
| 15 |                                                                                  | (0.811 - | (0.739 - | (1.108 - | (0.949 - | (1.127 - | (1.012 - | (0.985 - | (1.179 - | (0.926 - | (1.030 - | (0.930 - |
| 16 |                                                                                  | 1.263)   | 1.246)   | 1.332)   | 1.135)   | 1.577)   | 1.377)   | 1.583)   | 2.193)   | 1.163)   | 1.451)   | 1.301)   |
| 17 | <b>Education Level of the Mother's Partner at the Time of Interview</b>          |          |          |          |          |          |          |          |          |          |          |          |
| 18 | <b>Secondary or Higher (reference)</b>                                           | 1.00     | 1.00     | 1.00     | 1.00     | 1.00     | 1.00     | 1.00     | 1.00     | 1.00     | 1.00     | 1.00     |
| 19 | Completed primary                                                                | 1.046    | 1.100    | 1.115    | 0.997    | 1.137    | 1.056    | 0.910    | 1.266    | 1.071    | 0.989    | 1.087    |
| 20 |                                                                                  | (0.911 - | (0.902 - | (1.052 - | (0.926 - | (1.041 - | (0.940 - | (0.807 - | (0.994 - | (0.989 - | (0.852 - | (0.979 - |
| 21 |                                                                                  | 1.201)   | 1.341)   | 1.182)   | 1.074)   | 1.242)   | 1.187)   | 1.027)   | 1.613)   | 1.159)   | 1.148)   | 1.208)   |
| 22 | No education or incomplete primary                                               | 1.303    | 1.277    | 1.206    | 1.039    | 1.381    | 1.224    | 1.180    | 1.452    | 1.209    | 1.002    | 1.221    |
| 23 |                                                                                  | (1.059 - | (1.059 - | (1.109 - | (0.968 - | (1.218 - | (1.094 - | (0.981 - | (1.149 - | (1.069 - | (0.869 - | (1.043 - |
| 24 |                                                                                  | 1.602)   | 1.540)   | 1.312)   | 1.116)   | 1.566)   | 1.370)   | 1.420)   | 1.834)   | 1.368)   | 1.156)   | 1.428)   |
| 25 | <b>Age Band of the Mother's Partner at the Birth of the Mother's First Birth</b> |          |          |          |          |          |          |          |          |          |          |          |
| 26 | <b>24-29 (reference)</b>                                                         | 1.00     | 1.00     | 1.00     | 1.00     | 1.00     | 1.00     | 1.00     | 1.00     | 1.00     | 1.00     | 1.00     |
| 27 | 12-17                                                                            | 1.284    | 1.528    | 1.010    | 1.087    | 1.106    | 1.085    | 0.551    | 0.959    | 1.206    | 1.091    | 1.124    |
| 28 |                                                                                  | (0.668 - | (1.261 - | (0.697 - | (0.996 - | (0.627 - | (0.937 - | (0.141 - | (0.672 - | (0.847 - | (0.883 - | (0.664 - |
| 29 |                                                                                  | 2.470)   | 1.851)   | 1.466)   | 1.186)   | 1.952)   | 1.256)   | 2.147)   | 1.368)   | 1.715)   | 1.349)   | 1.901)   |
| 30 | 18-23                                                                            | 1.122    | 1.090    | 1.141    | 1.036    | 1.072    | 1.015    | 1.028    | 0.977    | 0.967    | 1.076    | 1.069    |
| 31 |                                                                                  | (0.948 - | (1.008 - | (1.070 - | (1.006 - | (0.970 - | (0.970 - | (0.872 - | (0.889 - | (0.881 - | (1.006 - | (0.954 - |
| 32 |                                                                                  | 1.327)   | 1.178)   | 1.217)   | 1.068)   | 1.186)   | 1.063)   | 1.211)   | 1.073)   | 1.061)   | 1.149)   | 1.198)   |
| 33 | 30-35                                                                            | 0.907    | 0.970    | 0.937    | 0.964    | 0.917    | 0.960    | 1.012    | 0.878    | 0.911    | 0.990    | 0.892    |
| 34 |                                                                                  | (0.770 - | (0.863 - | (0.875 - | (0.919 - | (0.825 - | (0.898 - | (0.880 - | (0.767 - | (0.831 - | (0.895 - | (0.795 - |
| 35 |                                                                                  | 1.069)   | 1.090)   | 1.004)   | 1.012)   | 1.019)   | 1.026)   | 1.163)   | 1.004)   | 1.000)   | 1.094)   | 1.000)   |
| 36 | 36-41                                                                            | 0.784    | 0.950    | 0.962    | 1.030    | 0.760    | 0.970    | 1.070    | 0.851    | 0.994    | 0.993    | 0.876    |
| 37 |                                                                                  | (0.587 - | (0.797 - | (0.852 - | (0.963 - | (0.614 - | (0.880 - | (0.842 - | (0.701 - | (0.851 - | (0.855 - | (0.715 - |
| 38 |                                                                                  | 1.048)   | 1.132)   | 1.086)   | 1.101)   | 0.940)   | 1.069)   | 1.360)   | 1.034)   | 1.160)   | 1.152)   | 1.074)   |
| 39 | 42-59                                                                            | 0.698    | 1.100    | 1.106    | 1.054    | 1.119    | 0.960    | 1.388    | 0.885    | 0.949    | 1.078    | 0.910    |
| 40 |                                                                                  | (0.413 - | (0.912 - | (0.907 - | (0.973 - | (0.807 - | (0.854 - | (0.940 - | (0.711 - | (0.731 - | (0.909 - | (0.656 - |
| 41 |                                                                                  | 1.178)   | 1.327)   | 1.349)   | 1.141)   | 1.550)   | 1.079)   | 2.052)   | 1.103)   | 1.233)   | 1.280)   | 1.263)   |

Wealth Quintile of the Child's Household

|    |                                          |          |          |          |          |          |          |          |          |          |          |          |          |
|----|------------------------------------------|----------|----------|----------|----------|----------|----------|----------|----------|----------|----------|----------|----------|
| 1  | <b>Richest (reference)</b>               | 1.00     | 1.00     | 1.00     | 1.00     | 1.00     | 1.00     | 1.00     | 1.00     | 1.00     | 1.00     | 1.00     |          |
| 2  | Rich                                     | 1.267    | 1.223    | 1.288    | 1.045    | 1.143    | 1.143    | 1.143    | 1.143    | 1.143    | 1.121    | 1.121    |          |
| 3  |                                          | (1.111 - | (1.161 - | (1.187 - | (0.926 - | (1.065 - | (1.065 - | (1.065 - | (1.065 - | (1.065 - | (1.023 - | (1.023 - |          |
| 4  | Middle                                   | 1.445)   | 1.290)   | 1.398)   | 1.180)   | 1.226)   | 1.226)   | 1.226)   | 1.226)   | 1.226)   | 1.228)   | 1.228)   |          |
| 5  | Poorer                                   |          | 0.996    | 0.936    | 0.923    | 0.937    | 0.937    | 0.937    | 0.937    | 0.957    | 0.977    | 0.977    |          |
| 6  |                                          |          | (0.938 - | (0.913 - | (0.891 - | (0.870 - | (0.870 - | (0.870 - | (0.870 - | (0.905 - | (0.922 - | (0.922 - |          |
| 7  |                                          |          | 1.057)   | 0.959)   | 0.956)   | 1.008)   | 1.008)   | 1.008)   | 1.008)   | 1.012)   | 1.037)   | 1.037)   |          |
| 8  | <b>Poorest (reference)</b>               | 1.00     | 1.00     | 1.00     | 1.00     | 1.00     | 1.00     | 1.00     | 1.00     | 1.00     | 1.00     | 1.00     |          |
| 9  |                                          |          |          |          |          |          |          |          |          |          |          |          |          |
| 10 | <b>Water Piped to the Child's House</b>  |          |          |          |          |          |          |          |          |          |          |          |          |
| 11 | <b>Piped to house (reference)</b>        |          |          |          |          |          |          |          |          |          |          |          |          |
| 12 | Water not piped to house                 | 1.066    | 1.138    | 0.936    | 0.964    | 1.001    | 1.066    | 0.991    | 1.163    | 0.966    | 1.065    | 0.976    | 1.028    |
| 13 |                                          | (0.924 - | (1.017 - | (0.883 - | (0.925 - | (0.919 - | (0.995 - | (0.874 - | (1.015 - | (0.884 - | (0.979 - | (0.886 - | (0.933 - |
| 14 |                                          | 1.229)   | 1.273)   | 0.993)   | 1.004)   | 1.089)   | 1.142)   | 1.123)   | 1.333)   | 1.055)   | 1.159)   | 1.076)   | 1.133)   |
| 15 | <b>Flush Toilet at Child's House</b>     |          |          |          |          |          |          |          |          |          |          |          |          |
| 16 | <b>Flush toilet at house (reference)</b> |          |          |          |          |          |          |          |          |          |          |          |          |
| 17 | No flush toilet at house                 | 0.948    | 1.369    | 1.158    | 1.173    | 1.082    | 1.239    | 1.011    | 0.996    | 1.088    | 1.057    | 0.984    | 0.982    |
| 18 |                                          | (0.818 - | (1.075 - | (1.089 - | (1.064 - | (0.988 - | (1.037 - | (0.879 - | (0.753 - | (0.994 - | (0.889 - | (0.872 - | (0.797 - |
| 19 |                                          | 1.098)   | 1.745)   | 1.232)   | 1.294)   | 1.185)   | 1.481)   | 1.164)   | 1.318)   | 1.191)   | 1.257)   | 1.110)   | 1.209)   |
| 20 | <b>Child Measles Vaccination</b>         |          |          |          |          |          |          |          |          |          |          |          |          |
| 21 | Not vaccinated                           | 1.653    | 1.000    | 1.190    | 1.066    | 1.211    | 1.200    | 1.229    | 1.185    | 1.045    | 1.030    | 1.299    | 1.127    |
| 22 |                                          | (1.309 - | (0.905 - | (1.072 - | (1.022 - | (1.037 - | (1.130 - | (0.969 - | (1.050 - | (0.907 - | (0.940 - | (1.101 - | (1.035 - |
| 23 |                                          | 2.088)   | 1.106)   | 1.320)   | 1.111)   | 1.414)   | 1.275)   | 1.559)   | 1.337)   | 1.204)   | 1.129)   | 1.531)   | 1.228)   |
| 24 | <b>Observations</b>                      | 40,299   | 38,612   | 28,797   | 23,657   | 29,345   | 24,846   | 28,783   | 24,251   | 32,809   | 27,435   | 8,027    | 6,026    |

Note: High SES includes children who are in households that are in the rich or richest wealth quintiles, have mothers with completed primary school or higher, and live in an urban area. Low SES includes children who are in households that are in the poor and poorest wealth quintiles, have mothers with incomplete primary or no education, and live in a rural area.

Results: Sensitivity Analysis

Recent work by Subramanian *et al*<sup>2</sup> and Ozaltinet *al*<sup>34</sup> indicates that maternal height is a significant predictor of infant mortality, anthropometric failure and anaemia in India. At the cost of a smaller sample (n=101,054) height is included as a control variable in the regression, in addition to the controls used in the adjusted regressions, to examine whether in the sub-set of countries for which the Demographic and Health Surveys have data on women’s height, the age effect that we observe is confounded by maternal height. Household religion is also included as a control variable as in many low- to middle-income countries religion has a bearing on household decision making that may include health seeking behaviour. Moreover, religion may influence the autonomy of women to make decisions over the timing of their first birth. Even after controlling for height and religion, the age of the mother at first birth remains a significant risk factor for infant mortality, anthropometric failure and child health outcomes (Table A5). Controlling for height, which is an additional biological covariate, and religion, which is an additional social covariate, the general relationship between the age of mother at first birth and child health outcomes persists (Table A5).

Deleted: is

Deleted: indicator

Deleted: indicator

Deleted: does not change

Discussion

Principal findings

In this paper we show that, controlling for maternal, paternal and household and social factors, there is an improvement in child health outcomes as the age of mother at first birth rises up to ages 27-29. This is a much higher age than has been previously reported, where teen pregnancy is emphasized as a risk factor. In the adjusted model, we show that there is an elevated risk in infant mortality in first borns to mother's below ages 27-29, though the effect is only statistically significant for women below age 18. However, the lack of significance may be because cases of infant mortality in our sample are relatively rare, whereas we find mothers below ages 27-29 have elevated and statistically significant risks for stunting, diarrhoea, and anaemia outcomes.

Deleted: 27,

Deleted: controlling for maternal, paternal and household and social factors

Deleted: usually found in the literature

Deleted: infant mortality shows

Deleted: for

Deleted: is

Deleted: and when we turn to models for stunting, diarrhoea, and anaemia outcomes,

Deleted: all of these

Deleted: all mothers below age 27.,

Deleted: and this higher risk is statistically significant.

Our results indicate that children to mothers below age 27-29 are at higher risk of poor health outcomes. In our sample of low- to middle-income countries only 7% of women delay their first birth until the age of 27 or older. The United States has seen a steady rise in the average age at first birth from 21 in 1970 to 25 in 2000.<sup>38</sup> Age at first birth is increasing in some of our sample countries, but is still lagging behind the level seen in United States. For example, in the 1993 Bangladesh DHS the mean age for first births in the last five years was 18.2, but in 2007 had risen to 18.5. In

Deleted: s

Ghana, age for first births increased from a mean of 19.8 in 1988 to 21.2 in 2008. In Tanzania, mean age at first birth increased from 19.2 in 1991 to 19.6 in 2004. Bongaarts found that family planning programs can reduce the child mortality rate by delaying the age at first birth, preventing high parity births, and improving birth spacing.<sup>39</sup> The results in this paper indicate that there are benefits to reducing infant mortality and improving child health by delaying the age at first birth even for women in their early twenties.

Taken together, the risk of a poor health outcome dissipates by age 21, but the general trend of improvement continues through to age 27-29. Thus while the early 20s presents a lower risk of a poor child health outcome than a first birth to a teen mother, delaying to the late 20s means that the risk of a poor child health outcome is minimized. Moreover, We find evidence of a paternal age gradient, although it is weaker than the maternal age gradient. This indicates that social mechanisms play a role in part, but the biological maturity of the mother also plays a role in determining child health outcomes. This finding was also supported by the stratification by low and high socio-economic status, where we found that the age gradient was not solely reflecting socio-economic differences across the ages.

### Comparisons to other studies

Consistent with country studies, in this paper we show that delaying first birth beyond the teen years and into the twenties has a positive impact on child survival. While from the 2005-6 India sample, Raj *et al.*<sup>13</sup> found that maternal age only has a significant effect on stunting and underweight, in the current study that applies to 55 low- to middle-income countries we find that young maternal age has a significant effect on reducing infant mortality, stunting, underweight, diarrhoea and moderate to severe anaemia. The broadening of the significant results to include other child health outcomes can stem from the inclusion of a greater number of countries, and also from a wider time horizon. As the 2005-6 India National Family Health Survey-3 is one of the 118 surveys within our current study, the comparison between our study and the Raj *et al.*<sup>13</sup> study highlights that generalizing across countries does not always reflect each country's experience. Thus we include the country specific examples in the appendix (Table A3). Even so, for the case of India in our sample we include three National Family Health Surveys (1992, 1998, 2005-6). Thus, even the country

- Deleted: Unlike the Raj *et al.*<sup>13</sup> study that focused on the case of India,
- Deleted: in general in the low- to middle-income countries
- Deleted: of
- Deleted: strong
- Deleted: In the 2005-6 India sample, Raj *et al.*<sup>13</sup> find that maternal age only has a significant effect on stunting and underweight
- Deleted: is
- Deleted: not mirrored in
- Deleted: there are
- Deleted: and not just the one

specific results may differ from the survey specific results. Taking a broad view, however, the two papers yield the same fundamental conclusion that delaying first birth beyond the teen years is beneficial for child health outcomes.

Deleted: can

Deleted: and

Deleted: is,

Deleted: Changing the date range and countries within the study creates subtle differences in the finer points of the results, but the fundamental result remains consistent.

The results in this paper also compare to that of Subramanian *et al.*<sup>40</sup> which teases out the biological from the socio-economic predictors of child health outcomes. If being a young mother is associated with low socio-economic status in ways we have not controlled for, maternal age at first birth may simply be a proxy for socio-economic status. However if this were true, we would expect the effect of young fathers to be similar to that of mothers (Subramanian *et al.*<sup>40</sup> put forward this idea of looking at the differential effects of maternal and paternal indicators on child health as a method of distinguishing between biological and social mechanisms).

#### Limitations of the study

Although this study provides important insights to the benefits of delaying first birth to age 27-29 to child health, there are certain limitations that should be considered when interpreting the results. The primary variable of interest, age of mother at first birth, is subject to measurement error as data collection of this variable relies on recall by the respondent. The same holds true for identifying the population of children within a 0-11 and 12-60 month age range. We already include the 60 month old children (which would normally be restricted to 12-59 months) as it is common for the mother to round up in their recall of the child's age. The result is that a larger fraction of children are reported to be 60 months rather than 59 months. As this inconsistency is attributed to recall error, we follow the World Health Organization guidelines and include the 60 month olds in the child group. For the women's age, we assume that measurement error increases with actual age. Given our concern over young mothers, then the measurement error on the age will be minimized for this group of interest.

Deleted: in

Deleted: to child health

A further limitation of the model is that the socio-economic measures of male and female education, along with the wealth index, may not fully capture the socio-economic status of the woman and her child. While we include information about location of residence, piped water to the house, and flush toilet, these all serve as proxies for actual SES. Any unobserved wealth captured in the residual will confound the current results. Factors such as actual household income and education quality are such variables that we are unable to control for in the regression and may significantly influence child health outcomes and shape our understanding of the role of SES factors.

Observational studies are subject to the limitation of omitted variables. In this case, there may be variables that are correlated with the age of the mother at birth, but for which we do not control. This would mean that the significance attributed to age of mother as a significant correlate of child health outcomes, may in fact be a proxy for other omitted factors. Fixed effects on year of birth are included in both the unadjusted and adjusted regressions to control for common factors in a given year, and secular changes over time. Country fixed effects are also included in the unadjusted and adjusted regressions to control for factors that may be common to women within the same country and are unchanging over time. The covariates control for deviations from the country average and the global time trends in the variables included in the adjusted regressions. However, there may be some factors that are correlated to the explanatory variable of interest that is omitted from the regression. In which case, the regression coefficients suffer from omitted variable bias. Omitted variables correlated to the age of the mother could include, place of delivery, trained or untrained birth attendance, and breastfeeding.

One of the key outcomes of interest in this study is infant mortality. Infant mortality is aggregated across all causes of death. However, it could be reasonably expected that the age of the mother affects infant mortality outcomes by cause of death. Using a range of child health outcomes in this study, we have illustrated how the age of mother is differentially (or similarly) related to various outcomes. However, an investigation of the vulnerability of death by, say, pneumonia, diarrhoea, malaria or AIDS by the age of the mother is beyond the scope of this study as cause of death for children is not recorded in the Demographic and Health Surveys.

**Conclusions and implications**

The current study documents that the first born child of a woman aged less than 27-29 in low- to middle-income countries, is at a higher risk of infant mortality, stunting, underweight, diarrhoea, and moderate to severe anaemia, but not wasting. Children born to women aged 12-14 or 15-17 are significantly more likely to die in their first year of life than children born to women aged 27-29. The risk of stunting, diarrhoea, and anaemia diminishes significantly as a woman delays her first birth through to age 27-29, when the risk is minimized. The risk of underweight decreases significantly as a woman delays her first birth and is minimized by age 21. These results offer support to the evidence of the benefits of delaying first birth to offspring. Importantly, beyond just avoiding teen pregnancy, the results in this study show that it is optimal to delay first birth until age 27-29. The results reveal that interventions designed to target adolescents

- Deleted: for
- Deleted: who is born to
- Deleted: it
- Deleted: strong
- Deleted: at
- Deleted: significantly different risk of
- Deleted: suffer mortality
- Deleted: For children born to women aged 19-26, the risk of mortality declines as she ages each year with maternal age, but this risk is not significantly different from the risk to children born to women aged 27-29.
- Deleted: to offspring
- Deleted: , and not just avoiding teen pregnancy

potentially omit a group of women in their early twenties who are also at risk of having children with poor health

outcomes. Development of programs targeting women in general, and not just targeting teen mothers, should provide

women and families with tools to make informed decisions over the timing of their first birth and the benefits of

delaying the birth. Highlighting the benefits of delaying first birth to the child's health, not only allowing women to

nature biologically, but also to provide a mechanism for young female family members improve knowledge and skills in

childcare, family planning and empower female autonomy in decisionmaking within the household.

Deleted: |

Deleted: have time to build their own education and skills to empower their autonomy and to better care for their families

Our results indicated that while the absolute risk of poor child health outcomes is lower when the mother is in a

high socio-economics household, there remains a high relative risk of poor child health outcomes for young mothers

even in high socio-economics households. The persistence of the age gradient across the SES groups highlights that child

and maternal health issues associated with age of the mother cut across socio-economic lines and the children of young-

rich women are not shielded from the relative risk of a poor health outcome. This indicates that the biological

immaturity of young mothers also affects child health outcomes in addition to the social disadvantage young mothers

often face.

Deleted: -SES

Deleted: -SES

Deleted: SES

Encouraging women to delay their first birth, and encouraging families to permit the delay when the woman is

not granted autonomy over her reproductive health decisions, come through providing women with viable and valuable

alternatives. Education programs aimed at encouraging women to stay in school, take on meaningful employment

opportunities, and provide service to the community, relieves the immediacy of the need or desire for child bearing. It

also provides empowerment to women in illustrating to herself and her family that her contribution to society need not

only be defined by her reproductive life. By delaying a few years and engaging in other activities she contributes to

society as well as broadening her skills and knowledge to go on to be a more informed and more highly educated

mother. These benefits to the women, then trickle through the generations and benefit her offspring. In this paper, we

show that those benefits are in terms of health, but future studies may highlight the educational and social benefits for a

child if a woman delays her first birth.

Deleted: to

Deleted: e

Deleted: ed

## References

1. United Nations. We Can End Poverty 2015: Millennium Development Goals, 2011.
2. Subramanian SV, Ackerson LK, Davey Smith G, John NA. Association of Maternal Height With Child Mortality, Anthropometric Failure, and Anemia in India. *JAMA* 2009;301(16):1691-701.
3. Ozaltin E, Hill K, Subramanian SV. Association of maternal stature with offspring mortality, underweight, and stunting in low- to middle-income countries. *JAMA* 2010;303(15):1507-16.
4. Temin M, Levine R. Start with a Girl: A New Agenda for Global Health. *A Girls Count Report on Adolescent Girls*. Washington D.C.: Center for Global Development, 2009.
5. Kembo J, Van Ginneken JK. Determinants of Infant and Child Mortality in Zimbabwe: Results of Multivariate Hazard Analysis. *Demographic Research* 2009;21(13):367-84.
6. Knodel J, Herman AT. Effects of birth rank, maternal age, birth interval and sibship on infant and child mortality: Evidence from 18th and 19th Century Reproductive Histories. *American Journal of Public Health* 1984;74(10):1098-106.
7. Manda SOM. Birth intervals, breastfeeding and determinants of childhood mortality in Malawi. *Social Science & Medicine* 1999;48(3):301-12.
8. Reynolds HW, Wong EL, Tucker H. Adolescents' Use of Maternal and Child Health Services In Developing Countries. *International Family Planning Perspectives* 2006;32(1):6-16.
9. Villar J, Belizan J. The relative contribution of prematurity and fetal growth retardation to low birth weight in developing and developed societies. *American Journal of Obstetrics and Gynecology* 1982;143(7):793-98.
10. Vitolo MR, Gama CM, Bortolini GA, Campagnolo PD, Drachler ML. Some risk factors associated with overweight, stunting and wasting among children under 5 years old. *J Pediatr (Rio J)* 2008;84(3):251-57.
11. Wang SC, Lee SH, Lee MC, Wang L. The effects of age and aboriginality on the incidence of low birth weight in mountain townships of Taiwan. *Journal of Public Health* 2009;31(3):406-12.
12. Hobercraft J. Fertility patterns and child survival: a comparative analysis. *Population Bulletin of the United Nations* 1992;33:1-31.
13. Raj A, Saggurti N, Winter M, Labonte A, Decker MR, Balaiah D, et al. The effect of maternal child marriage on morbidity and mortality of children under 5 in India: cross sectional study of a nationally representative sample. *Br Med J (Clin Res Ed)* 2010;340.
14. Trussell J, Hammerslough C. A hazards-model analysis of the covariates of infant and child mortality in Sri Lanka. *Demography* 1983;20(1):1-26.
15. ICF Macro. DHS Final Reports. In: DHS M, editor. Calverton, 2011.
16. Cooper LG, Leeland NL, Alexander G. Effect of maternal age on birth outcomes among young adolescents. *Social Biology* 1995;42:22-35.
17. Fraser AM, Brockert JE, Ward RH. Association of Young Maternal Age with Adverse Reproductive Outcomes. *N Engl J Med* 1995;332(17):1113-18.
18. Geronimus AT. On Teenage Childbearing and Neonatal Mortality in the United States. *Population and Development Review* 1987;13(2):245-79.
19. Geronimus AT, Korenman S, Hillemeier MM. Does Young Maternal Age Adversely Affect Child Development? Evidence from Cousin Comparisons in the United States. *Population and Development Review* 1994;20(3):585-609.
20. Horon IL, Strobino DM, MacDonald HM. Birth weights among infants born to adolescent and young adult women. *American Journal of Obstetrics and Gynecology* 1983;146:444-9.
21. Trussell J. Teenage pregnancy in the United States. *Family Planning Perspectives* 1988;20:262-72.
22. Ventura SJ, Mathews TJ, Hamilton BE. Births to teenagers in the United States, 1940-2000. *National Vital Statistics Report* 2001;49(10).
23. Alam N. Teenage motherhood and infant mortality in Bangladesh: Maternal age-dependent effect of parity one. *Journal of biosocial science* 2000;32(2):229-36.



24. DHS. Demographic and Health Surveys. Calverton, MD: MEASURE DHS, 2009.
25. Rutstein SO, Rojas G. Guide to DHS Statistics. Calverton, Maryland: ORC Macro, MEASURE DHS+, 2003.
26. Wirth ME, Wirth E, Delamonica E, Sacks D, Balk A, Minujin A. Monitoring health equity in the MDGs: A practical guide. New York: CIESIN/UNICEF, 2006.
27. Vaessen M. The potential of the demographic and health surveys (DHS) for the evaluation and monitoring of maternal and child health indicators. In: Khlat M, editor. *Demographic evaluation of health programmes (Proceedings)*. Paris: CICRED/UNFPA, 1996.
28. Pullum TW. An Assessment of the Quality of Data on Health and Nutrition in the DHS Surveys, 1993-2003. Calverton, Maryland, USA: Macro International Inc, 2008.
29. ICF Macro. Demographic and Health Survey Interviewer's Manual. In: Macro International, editor. Calverton, Maryland, U.S.A.: ICF Macro, 2006.
30. ICF Macro. Description of the Demographic and Health Surveys Individual Recode Data File. In: Measure DHS, editor, 2008.
31. Demographic and Health Survey. Sampling Manual. DHS-III. Calverton, Maryland: Macro International, 1996.
32. ICF Macro. Measure DHS Biomarkers Inventory. In: DHS M, editor, 2011.
33. Borghi E, de Onis M, Garza C, Van den Broeck J, Frongillo E, Grummer-Strawn L, et al. Construction of the World Health Organization child growth standards: selection of methods for attained growth curves. *Statistics in Medicine* 2006;25(2):247-65.
34. Ozaltin E, Hill K, Subramanian SV. Association of Maternal Stature with Offspring Mortality, Underweight, and Stunting in Low- to Middle-Income Countries. *JAMA* 2010;303(15):1507-16.
35. Filmer D, Pritchett LH. Estimating wealth effects without expenditure data--or tears: an application to educational enrollments in states of India. *Demography* 2001;38(1):115-32.
36. Zou G. A modified poisson regression approach to prospective studies with binary data. *Am J Epidemiol* 2004;159(7):702-06.
37. Deaton A. *The Analysis of Household Surveys: A Microeconomic Approach to Development Policy*. Baltimore: World Bank, 1997.
38. Mathews TJ, Hamilton BE. Mean age of mother, 1970-2000. *National Vital Statistics Report* 2002;51(1).
39. Bongaarts J. Does Family Planning Reduce Infant Mortality Rates? *Population and Development Review* 1987;13(2):323-34.
40. Subramanian SV, Ackerson LK, Smith GD. Parental BMI and Childhood Undernutrition in India: An Assessment of Intrauterine Influence. *Pediatrics* 2010;126(3):663-71.

**Contributors:** JEF co-led the conception and interpretation of results in this study. She assisted with drafting the manuscript. She prepared the data, empirical analysis, and tables presented in the paper. As guarantor, she accepts full responsibility for this submitted work, had access to the data, and controlled the decision to publish. EÖ assisted with conception of the article themes, compilation of the data set and empirical analysis for this study, and critical revision of the paper. DC led the conception of this study and interpretation of study findings as well as assisting with the drafting of the manuscript. Authors have seen and approved this final submitted version of the manuscript. All authors will provide final approval of the version to be published.

**Acknowledgements:** The authors thank the invaluable research assistance of Laura Khan and June Po in assisting with the preparation of the draft.

**Funding:** We thank the William and Flora Hewlett Foundation for support of this research. Conception of this paper was funded by the Centre for Global Development. Researchers operated independently from the funders on this work, and funders neither provided nor were required to provide review and approval of this research.

**Deleted:** Centre for Disease Control

**Competing Interests:** None declared

**Exclusive License:** The Corresponding Author has the right to grant on behalf of all authors and does grant on behalf of all authors, an exclusive licence (or non exclusive for government employees) on a worldwide basis to the BMJ Publishing Group Ltd and its Licensees to permit this article (if accepted) to be published in BMJ editions and any other BMJ PGL products and sublicenses to exploit all subsidiary rights, as set out in our licence (<http://resources.bmj.com/bmj/authors/checklists-forms/licence-for-publication>).

#### **Ethical Review**

The DHS data collection procedures were approved by the ICF Macro International (Calverton, Maryland) Institutional Review Board as well as by the relevant body in each country which approves research studies on human subjects. Oral informed consent for the interview/survey was obtained from respondents by interviewers. The current study was reviewed by Harvard School of Public Health Institutional Review Board (Protocol #20069-101) and was ruled exempt from full review because the study was based on an anonymous public use data set with no identifiable information on the survey participants.

1  
2  
3  
4  
5  
6  
7  
8  
9  
10  
11  
12  
13  
14  
15  
16  
17  
18  
19  
20  
21  
22  
23  
24  
25  
26  
27  
28  
29  
30  
31  
32  
33  
34  
35  
36  
37  
38  
39  
40  
41  
42  
43  
44  
45  
46  
47  
48  
49  
50  
51  
52  
53  
54  
55  
56  
57  
58  
59  
60

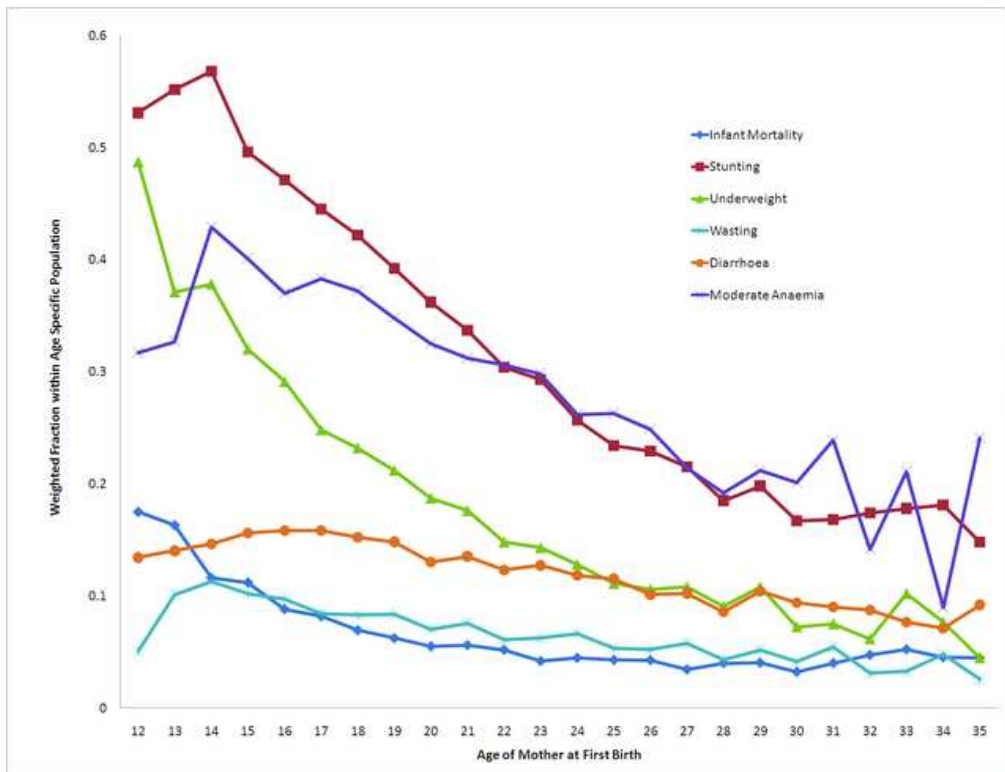

Figure 1: Child Health Indicator Weighted Prevalence by Age of Mother at First Birth  
53x41mm (300 x 300 DPI)



Figure 2: Plot of Adjusted Relative Risk Ratios and 95% Confidence Intervals as per the results tabulated in Table 4  
174x176mm (300 x 300 DPI)



1  
2  
3  
4  
5  
6  
7  
8  
9  
10  
11  
12  
13  
14  
15  
16  
17  
18  
19  
20  
21  
22  
23  
24  
25  
26  
27  
28  
29  
30  
31  
32  
33  
34  
35  
36  
37  
38  
39  
40  
41  
42  
43  
44  
45  
46  
47  
48  
49  
50  
51  
52  
53  
54  
55  
56  
57  
58  
59  
60

1  
2  
3  
4  
5  
6  
7  
8  
9  
10  
11  
12  
13  
14  
15  
16  
17  
18  
19  
20  
21  
22  
23  
24  
25  
26  
27  
28  
29  
30  
31  
32  
33  
34  
35  
36  
37  
38  
39  
40  
41  
42  
43  
44  
45  
46  
47  
48  
49  
50  
51  
52  
53  
54  
55  
56  
57  
58  
59  
60

STROBE Statement—Checklist of items that should be included in reports of *cross-sectional studies*

**All items below are included in the study entitled:** Association of Maternal Age with Infant Mortality, Child Anthropometric Failure, Diarrhoea, and Anaemia for First Births in Low- and Middle-Income Countries

|                              | Item No | Recommendation                                                                                                                                                                                                                                                                                                                             |
|------------------------------|---------|--------------------------------------------------------------------------------------------------------------------------------------------------------------------------------------------------------------------------------------------------------------------------------------------------------------------------------------------|
| <b>Title and abstract</b>    | 1       | (a) Indicate the study's design with a commonly used term in the title or the abstract<br>(b) Provide in the abstract an informative and balanced summary of what was done and what was found                                                                                                                                              |
| <b>Introduction</b>          |         |                                                                                                                                                                                                                                                                                                                                            |
| Background/rationale         | 2       | Explain the scientific background and rationale for the investigation being reported                                                                                                                                                                                                                                                       |
| Objectives                   | 3       | State specific objectives, including any prespecified hypotheses                                                                                                                                                                                                                                                                           |
| <b>Methods</b>               |         |                                                                                                                                                                                                                                                                                                                                            |
| Study design                 | 4       | Present key elements of study design early in the paper                                                                                                                                                                                                                                                                                    |
| Setting                      | 5       | Describe the setting, locations, and relevant dates, including periods of recruitment, exposure, follow-up, and data collection                                                                                                                                                                                                            |
| Participants                 | 6       | (a) Give the eligibility criteria, and the sources and methods of selection of participants                                                                                                                                                                                                                                                |
| Variables                    | 7       | Clearly define all outcomes, exposures, predictors, potential confounders, and effect modifiers. Give diagnostic criteria, if applicable                                                                                                                                                                                                   |
| Data sources/<br>measurement | 8*      | For each variable of interest, give sources of data and details of methods of assessment (measurement). Describe comparability of assessment methods if there is more than one group                                                                                                                                                       |
| Bias                         | 9       | Describe any efforts to address potential sources of bias                                                                                                                                                                                                                                                                                  |
| Study size                   | 10      | Explain how the study size was arrived at                                                                                                                                                                                                                                                                                                  |
| Quantitative variables       | 11      | Explain how quantitative variables were handled in the analyses. If applicable, describe which groupings were chosen and why                                                                                                                                                                                                               |
| Statistical methods          | 12      | (a) Describe all statistical methods, including those used to control for confounding<br>(b) Describe any methods used to examine subgroups and interactions<br>(c) Explain how missing data were addressed<br>(d) If applicable, describe analytical methods taking account of sampling strategy<br>(e) Describe any sensitivity analyses |
| <b>Results</b>               |         |                                                                                                                                                                                                                                                                                                                                            |
| Participants                 | 13*     | (a) Report numbers of individuals at each stage of study—eg numbers potentially eligible, examined for eligibility, confirmed eligible, included in the study, completing follow-up, and analysed<br>(b) Give reasons for non-participation at each stage<br>(c) Consider use of a flow diagram                                            |
| Descriptive data             | 14*     | (a) Give characteristics of study participants (eg demographic, clinical, social) and information on exposures and potential confounders<br>(b) Indicate number of participants with missing data for each variable of interest                                                                                                            |
| Outcome data                 | 15*     | Report numbers of outcome events or summary measures                                                                                                                                                                                                                                                                                       |
| Main results                 | 16      | (a) Give unadjusted estimates and, if applicable, confounder-adjusted estimates and their precision (eg, 95% confidence interval). Make clear which confounders were adjusted for and why they were included<br>(b) Report category boundaries when continuous variables were categorized                                                  |

(c) If relevant, consider translating estimates of relative risk into absolute risk for a meaningful time period

|                          |    |                                                                                                                                                                            |
|--------------------------|----|----------------------------------------------------------------------------------------------------------------------------------------------------------------------------|
| Other analyses           | 17 | Report other analyses done—eg analyses of subgroups and interactions, and sensitivity analyses                                                                             |
| <b>Discussion</b>        |    |                                                                                                                                                                            |
| Key results              | 18 | Summarise key results with reference to study objectives                                                                                                                   |
| Limitations              | 19 | Discuss limitations of the study, taking into account sources of potential bias or imprecision. Discuss both direction and magnitude of any potential bias                 |
| Interpretation           | 20 | Give a cautious overall interpretation of results considering objectives, limitations, multiplicity of analyses, results from similar studies, and other relevant evidence |
| Generalisability         | 21 | Discuss the generalisability (external validity) of the study results                                                                                                      |
| <b>Other information</b> |    |                                                                                                                                                                            |
| Funding                  | 22 | Give the source of funding and the role of the funders for the present study and, if applicable, for the original study on which the present article is based              |

\*Give information separately for exposed and unexposed groups.

**Note:** An Explanation and Elaboration article discusses each checklist item and gives methodological background and published examples of transparent reporting. The STROBE checklist is best used in conjunction with this article (freely available on the Web sites of PLoS Medicine at <http://www.plosmedicine.org/>, Annals of Internal Medicine at <http://www.annals.org/>, and Epidemiology at <http://www.epidem.com/>). Information on the STROBE Initiative is available at [www.strobe-statement.org](http://www.strobe-statement.org).
